# Supplementary material for: Recruitment strategies in randomised controlled trials of men aged 50 years and older: a systematic review
Source: PubMed Central journal article supplement — BMJ Open. 2019 Apr 3;9(4):e025580. doi: 10.1136/bmjopen-2018-025580 (PMC6500287; doi:10.1136/bmjopen-2018-025580), 2019-04-03
Supplement: bmjopen-2018-025580.draft_revisions.pdf [file bmjopen-2018-025580.draft_revisions.pdf]

# BMJ Open

BMJ Open is committed to open peer review. As part of this commitment we make the peer review history of every article we publish publicly available.

When an article is published we post the peer reviewers' comments and the authors' responses online. We also post the versions of the paper that were used during peer review. These are the versions that the peer review comments apply to.

The versions of the paper that follow are the versions that were submitted during the peer review process. They are not the versions of record or the final published versions. They should not be cited or distributed as the published version of this manuscript.

BMJ Open is an open access journal and the full, final, typeset and author-corrected version of record of the manuscript is available on our site with no access controls, subscription charges or pay-per-view fees (<http://bmjopen.bmj.com>).

If you have any questions on BMJ Open's open peer review process please email [info.bmjopen@bmj.com](mailto:info.bmjopen@bmj.com)

# BMJ Open

## Recruitment Strategies in Randomised Controlled Trials of Men Aged 50 Years and Older: A Systematic Review

|                               |                                                                                                                                                                                                                                                        |
|-------------------------------|--------------------------------------------------------------------------------------------------------------------------------------------------------------------------------------------------------------------------------------------------------|
| Journal:                      | <i>BMJ Open</i>                                                                                                                                                                                                                                        |
| Manuscript ID                 | bmjopen-2018-025580                                                                                                                                                                                                                                    |
| Article Type:                 | Research                                                                                                                                                                                                                                               |
| Date Submitted by the Author: | 23-Jul-2018                                                                                                                                                                                                                                            |
| Complete List of Authors:     | Bracken, Karen; NHMRC Clinical Trials Centre, Askie, Lisa; NHMRC Clinical Trials Centre<br>Keech, Anthony; NHMRC Clinical Trials Centre<br>Hague, Wendy; NHMRC Clinical Trials Centre<br>Wittert, Gary; University of Adelaide, Department of Medicine |
| Keywords:                     | Participant recruitment, Systematic review, Randomized Controlled Trials, Men's Health, Patient selection                                                                                                                                              |
|                               |                                                                                                                                                                                                                                                        |

SCHOLARONE™  
Manuscripts

Peer Review Only

1  
2  
3 **Recruitment Strategies in Randomised Controlled Trials of Men Aged 50**  
4  
5 **Years and Older: A Systematic Review**  
6  
7  
8  
9  
10

11 Karen Bracken, NHMRC Clinical Trials Centre, University of Sydney, 92-94 Parramatta Road,

12 Camperdown NSW 2050, [karen.bracken@ctc.usyd.edu.au](mailto:karen.bracken@ctc.usyd.edu.au) (corresponding author)  
13  
14

15  
16 Lisa Askie, NHMRC Clinical Trials Centre, University of Sydney, 92-94 Parramatta Road, Camperdown

17 NSW 2050, [lisa.askie@ctc.usyd.edu.au](mailto:lisa.askie@ctc.usyd.edu.au)  
18  
19

20  
21 Anthony Keech, NHMRC Clinical Trials Centre, University of Sydney, 92-94 Parramatta Road,

22 Camperdown NSW 2050, [tony@ctc.usyd.edu.au](mailto:tony@ctc.usyd.edu.au)  
23  
24

25  
26 Wendy Hague, NHMRC Clinical Trials Centre, University of Sydney, 92-94 Parramatta Road,

27 Camperdown NSW 2050, [wendy@ctc.usyd.edu.au](mailto:wendy@ctc.usyd.edu.au)  
28  
29

30  
31 Gary Wittert, University of Adelaide, Adelaide, SA 5005, [gary.wittert@adelaide.edu.au](mailto:gary.wittert@adelaide.edu.au)  
32  
33

34 Word count: 4,105  
35  
36  
37  
38  
39  
40  
41  
42  
43  
44  
45  
46  
47  
48  
49  
50  
51  
52  
53  
54  
55  
56  
57  
58  
59  
60

## ABSTRACT

**Background:** Recruitment to randomised controlled trials (RCTs) can be challenging and an estimated 50% of RCTs fail to achieve their recruitment targets. The potential consequences of failed RCT recruitment include wasted research resources, delays in the release of RCT results and increased likelihood of Type 2 error. Despite this, the published evidence on how best to conduct RCT recruitment is sparse.

**Objectives:** This systematic review aims to identify and review evaluations of strategies to recruit men aged over 50 years to RCTs.

**Methods:** We systematically searched MEDLINE, EMBASE, CINAHL and ORRCA, selected eligible studies and extracted data using a standardised, pre-piloted form. A narrative synthesis was performed.

**Results:** Sixteen studies were eligible for inclusion. Of included studies, one study was assessed as good quality, ten were fair quality, and five were of poor quality. Studies evaluated strategies to identify prospective participants and improve the processes for assessing participant eligibility, providing participant information and seeking consent. The most effective strategies for identifying participants were referral from an affiliated health service provider, mass mailing, and media coverage. Community outreach activities such as displaying posters and attending local community events were not effective strategies for participant identification. Trial-specific training of site recruitment staff, developed using qualitative analysis of recruitment visits, was found to improve recruitment. Provision of study information to prospective participants at a multi-disciplinary, group information session also improved recruitment compared to a standard, one-on-one consultation.

**Conclusion:** More prospectively designed evaluations of strategies to recruit men aged over 50 years to RCTs are needed.

Systematic review registration: PROSPERO CRD42017060301

**ARTICLE SUMMARY****Strengths and limitations of this study**

- This review incorporated systematic database search strategies and quality assessment tools to identify and appraise eligible studies.
- The categorisation of included studies according to the stage of the recruitment pathway they addressed is a practical approach designed to aid interpretation of the review results by trial managers.
- Many of the included studies were at risk of significant or some bias, limiting the reliability of the results presented in these papers.
- Few studies reported the cost of recruitment strategies.

## INTRODUCTION

RCTs (randomised controlled trials) are the accepted gold standard in health intervention research.

Recruitment to RCTs can be challenging and around 50% of RCTs fail to achieve their recruitment targets.[1-3] The potential consequences of failed RCT recruitment are considerable and include wasted research resources, delays in the release of RCT results and increased likelihood of Type 2 error. Clinical trial unit directors have identified the evaluation of strategies to boost recruitment as the highest priority in trial methodology research.[4]

Despite the importance of successful recruitment to the overall success of trials and the calls for research in this area, the published evidence on how best to conduct RCT recruitment is limited.[5]

Several large systematic reviews have found surprisingly few randomised evaluations of recruitment strategies with many randomised recruitment studies being underpowered, low quality, or set within hypothetical rather than real-world RCTs.[6-8]

Other recent recruitment-focused systematic reviews have concentrated on specific demographic groups or disease areas.[9-14] This approach recognises the diversity of trial populations, interventions, and designs to build a greater understanding of how recruitment strategies may influence specific participant groups.[15]

Following the release of the Guideline for the Study and Evaluation of Gender Differences in the Clinical Evaluation of Drugs by the United States Food and Drug Administration (FDA) in 1993,[16] there has been a greater focus on strategies to recruit more women to clinical trials.[17] However, research is also needed into how best to engage men in clinical trials. Men have a lower life expectancy than women, and men, especially those aged over 50 years, bear a greater disease burden.[18,19] There is disagreement on the reason for this health inequality. Some blame men for failing to care for their health and point to lower engagement by men with healthcare services, while others point to failures of healthcare services themselves to recognise and attend to men's specific healthcare needs and help-seeking preferences.[20-23] In either case, if men are less likely to engage with health services than women, then this may also impact their response to recruitment strategies

1  
2  
3 for RCTs. Despite this, to our knowledge, no systematic review has been published on strategies to  
4  
5 recruit men aged over 50 to RCTs.

6  
7 Evaluations of online and social media recruitment strategies are becoming more common with  
8  
9 promising results reported in the recruitment of adolescents and young people[10,24] and  
10  
11 women.[25,26] Facebook and other types of online promotion may achieve broader reach and be  
12  
13 more cost-effective than traditional recruitment methods such as newspaper advertising, media  
14  
15 coverage and posters.[26,27] However, a recent systematic review of recruitment using Facebook  
16  
17 found little evidence of its effectiveness in recruiting participants aged over 35 years.[24] It is  
18  
19 therefore unclear whether online and social media strategies are effective in recruiting men aged  
20  
21 over 50 to RCTs.

22  
23  
24 This review aims to identify and review evaluations of strategies to recruit men aged over 50 years  
25  
26 to RCTs in order to guide recruitment planning for future men's health RCTs.

## 27 28 **METHODS**

### 29 30 31 **Eligibility criteria**

32  
33  
34 Studies met our inclusion criteria if they evaluated a strategy or strategies intended to improve the  
35  
36 recruitment of men aged 50 years or older to an RCT. While the strategy needed to be set within the  
37  
38 context of recruitment to an RCT (the host RCT), there was no restriction placed on the study design  
39  
40 used to evaluate the recruitment strategy (the recruitment study).

41  
42 An initial scoping of the literature revealed that recruitment studies set within RCTs of both men and  
43  
44 women did not provide adequate detail to determine the effectiveness of recruitment strategies on  
45  
46 male participants alone. Therefore, to assess the impact of recruitment strategies on men, studies  
47  
48 were only eligible for inclusion if set within an RCT recruiting men only.

49  
50 The review included RCTs recruiting participants aged 50 years and older. Where the age range was  
51  
52 not specified, studies were included where the mean/median age was 60 years or older, or where  
53  
54 the disease of interest was prevalent in older men (e.g. prostate cancer).

1  
2  
3 Included studies needed to evaluate a specific recruitment strategy or strategies. Papers describing  
4 barriers and facilitators to recruitment or discussing informed consent but not presenting a specific  
5 strategy or approach to recruitment were excluded. Similarly, papers providing a brief account of  
6 recruitment without describing or evaluating specific strategies or approaches were excluded.  
7  
8  
9

10  
11  
12 The search strategy was restricted to papers published since 2000 to focus on evaluations conducted  
13 since the advent of the internet age. Internet and digital advances have provided researchers with  
14 many new opportunities for RCT recruitment, particularly in relation to communication and data  
15 systems, making evaluations published before 2000 less likely to be relevant to current trial  
16 practices.  
17  
18  
19  
20  
21  
22

### 23 **Search strategy**

24  
25  
26 A search of four databases (Medline, Embase, CINAHL and ORRCA) was performed in July 2017 and  
27 updated in December 2017. Studies published in English from 2000 onwards were considered for  
28 inclusion. Individualised search strategies (available as supplementary files) were developed for each  
29 database using a combination of keywords relating to recruitment, enrolment, men and RCTs. In  
30 addition, the reference lists of all included articles and other recruitment-related systematic reviews  
31 were searched by hand to identify other potentially relevant papers.  
32  
33  
34  
35  
36  
37  
38  
39

### 40 **Study selection and data extraction**

41  
42 Citations and abstracts were exported to Endnote® Version X8.2 and duplicates were removed. A  
43 10% random sample of citations was selected for independent screening for eligibility by two  
44 reviewers (KB and GW), with disagreement resolved by discussion. The Kappa statistic for double-  
45 screened citations indicated substantial agreement (Kappa=0.66) and the remaining 90% of articles  
46 were screened by KB alone.  
47  
48  
49  
50  
51  
52

53  
54 Data from the included studies were extracted by KB using a pre-piloted data extraction form.

55  
56 Studies were categorised according to disease area of the host RCT, type of host RCT (treatment,  
57  
58  
59



1  
2  
3 prevention or screening), number of participants in the recruitment study and recruitment study  
4  
5 design. Where reported, the number of prospective participants who received the recruitment  
6  
7 intervention and the number of those participants who went on to be screened and randomised to  
8  
9 the host RCT were extracted. The costs incurred were also extracted.  
10

### 11 **Categorisation of studies**

12  
13  
14  
15 The Qualitative Research Integrated within Trials (QuinteT) group's SEAR (Screened, Eligible,  
16  
17 Approached, Randomised) framework was developed to map each stage of the recruitment  
18  
19 pathway.[28] We adapted this framework to categorise the included studies according to the stage  
20  
21 or stages of the recruitment process they addressed: identification of participants ('Screened' in the  
22  
23 SEAR framework), assessment of eligibility ('Eligible' in the SEAR framework), and patient  
24  
25 information and consent ('Approached' in the SEAR framework).  
26  
27

### 28 **Outcome measures**

29  
30  
31 Our primary outcomes were: strategy uptake (defined as the percentage of people receiving the  
32  
33 recruitment intervention who went on to be randomised to the host RCT), strategy contribution  
34  
35 (defined as the percentage of all participants randomised to the host RCT who were randomised as a  
36  
37 result of a particular strategy) and strategy cost (defined as direct or indirect cost per participant  
38  
39 randomised).  
40  
41

### 42 **Assessment of study quality**

43  
44  
45 KB, in consultation with LA, assessed the quality of all included studies using quality assessment  
46  
47 tools adapted from the National Heart, Lung and Blood Institute Quality Assessment Tools.[29] The  
48  
49 tools listed criteria for judging study quality including study design, description of recruitment  
50  
51 interventions, description and measurement of recruitment outcomes, completeness of outcome  
52  
53 reporting, the performance of statistical testing and consideration of confounders. Based on these  
54  
55 criteria, studies were subjectively judged as being of good (least risk of bias), fair (susceptible to bias)  
56  
57  
58  
59

1  
2  
3 or poor (significant risk of bias) quality. Since this review addresses a methodological rather than a  
4  
5 clinical question, the fair quality category was broadly defined to include studies that provided  
6  
7 useful evaluation data even where some flaws were noted in the quality assessment.  
8  
9

### 10 **Methods of analysis**

11  
12 All studies, irrespective of quality, were included in the descriptive analysis in order to describe the  
13  
14 full range of strategies evaluated and to assist with hypothesis generation for future research.

15  
16 Outcome measures were only analysed for studies of fair or good quality. Estimates from poor  
17  
18 studies were excluded except where no estimates were available from studies of good or fair quality.

19  
20 In this case, the estimate is presented with a caveat that the study is of poor quality. We had  
21  
22 planned to perform a meta-analysis if studies were sufficiently homogeneous in the target  
23  
24 population and delivery of the intervention to do so.  
25  
26

27  
28 The Preferred Reporting Items for Systematic Reviews and Meta-Analyses (PRISMA) checklist was  
29  
30 completed and can be found in the supplementary files. This review was registered on the  
31  
32 international prospective register of systematic reviews, PROSPERO (registration number:  
33  
34 CRD42017060301).  
35  
36

## 37 **RESULTS**

### 38 **Study selection**

39  
40  
41  
42  
43 Nine hundred and fifty-three unique papers were extracted. Of these, 16 recruitment studies were  
44  
45 eligible for inclusion (Figure 1). These 16 recruitment studies (listed in Table 1) were conducted in  
46  
47 the context of 12 RCTs, since two RCTs hosted more than one recruitment study.  
48  
49  
50  
51  
52  
53  
54  
55  
56  
57  
58  
59  
60

1  
2  
3  
4  
5  
6  
7  
8  
9  
10  
11  
12  
13  
14  
15  
16  
17  
18  
19  
20  
21  
22  
23  
24  
25  
26  
27  
28  
29  
30  
31  
32  
33  
34  
35  
36  
37  
38  
39  
40  
41  
42  
43  
44  
45  
46  
47

Table 1: Key characteristics, summary of findings and quality assessment of included studies

| Author, year         | Host RCT acronym | Host RCT therapeutic area  | Recruitment stage studied      | Recruitment study design | # screened/ eligible/ randomised <sup>1</sup> | Intervention/s                                                                        | Summary of findings                                                                                                                                                                                                                                                                           | Quality assessment |
|----------------------|------------------|----------------------------|--------------------------------|--------------------------|-----------------------------------------------|---------------------------------------------------------------------------------------|-----------------------------------------------------------------------------------------------------------------------------------------------------------------------------------------------------------------------------------------------------------------------------------------------|--------------------|
| Bhar, 2013[30]       | Not specified    | Suicide prevention         | Identification of participants | Quantitative descriptive | 233/48/33                                     | Various mass mailing and health service referral strategies                           | Seeking referrals from a co-investigator's clinic was the most effective strategy and also had the highest uptake rate. Seeking referrals from non-collaborating health services and mass mailings were not effective strategies.                                                             | Fair               |
| Cauley, 2015[31]     | T trials         | Low testosterone treatment | Identification of participants | Quantitative descriptive | 51,085/931/790                                | Various mass mailing, media and community outreach strategies                         | Mass mailing was the most effective recruitment strategy and was also the lowest cost per man screened. TV, radio and print advertisements, clinicaltrials.gov listing, posters and flyers and presentations at events resulted in very few men being screened.                               | Poor               |
| Chlebowski, 2010[32] | SELECT           | Prostate cancer prevention | Identification of participants | Quantitative descriptive | 4022/NR/634                                   | Mailing to male homeowners vs mailing to previous female research participant spouses | Mailing previous female research participants' spouses resulted in higher recruitment uptake than mailing men and was also more cost-effective. Mailing women contributed fewer participants than mailing men due to the relatively small size of the past research participant mailing list. | Fair               |

|    |          |               |             |                 |              |              |                        |                                   |      |
|----|----------|---------------|-------------|-----------------|--------------|--------------|------------------------|-----------------------------------|------|
| 1  |          |               |             |                 |              |              |                        |                                   |      |
| 2  |          |               |             |                 |              |              |                        |                                   |      |
| 3  |          |               |             |                 |              |              |                        |                                   |      |
| 4  |          |               |             |                 |              |              |                        |                                   |      |
| 5  | Cook,    | SELECT        | Prostate    | Identification  | Non-         | NR/NR/8532   | Various site-directed  | Sites awarded grants increased    | Poor |
| 6  | 2010[33] |               | cancer      | of participants | randomised   |              | minority-targeted      | recruitment of African American   |      |
| 7  |          |               | prevention  |                 | controlled   |              | recruitment strategies | men significantly more than       |      |
| 8  |          |               |             |                 | trial        |              | funded by minority     | matched comparison sites.         |      |
| 9  |          |               |             |                 |              |              | recruitment            | Overall recruitment was also      |      |
| 10 |          |               |             |                 |              |              | enhancement grants     | increased at grant sites.         |      |
| 11 | Heiney,  | EASE          | Prostate    | Identification  | Quantitative | 440/178/59   | Various mass mailing,  | Mass mailing and health service   | Fair |
| 12 | 2010[34] |               | cancer      | of participants | descriptive  |              | media, health service  | referral strategies were          |      |
| 13 |          |               | treatment   |                 |              |              | referral and           | moderately effective.             |      |
| 14 |          |               |             |                 |              |              | community outreach     | Recruitment uptake was highest    |      |
| 15 |          |               |             |                 |              |              | strategies             | in participants identified        |      |
| 16 |          |               |             |                 |              |              |                        | through health service referral.  |      |
| 17 |          |               |             |                 |              |              |                        |                                   |      |
| 18 |          |               |             |                 |              |              |                        |                                   |      |
| 19 | Kumar,   | Not specified | Prostate    | Identification  | Quantitative | 3547/167/74  | Various media, health  | Principal investigator referral   | Poor |
| 20 | 2012[35] |               | cancer      | of participants | descriptive  |              | service referral and   | was the only effective            |      |
| 21 |          |               | prevention  |                 |              |              | community outreach     | recruitment strategy. Television, |      |
| 22 |          |               |             |                 |              |              | strategies             | newspaper, print and web-         |      |
| 23 |          |               |             |                 |              |              |                        | based communications and          |      |
| 24 |          |               |             |                 |              |              |                        | distribution of posters and       |      |
| 25 |          |               |             |                 |              |              |                        | flyers resulted in very few       |      |
| 26 |          |               |             |                 |              |              |                        | screenings.                       |      |
| 27 | Kusek,   | MTOPS         | Benign      | Identification  | Quantitative | 4170/NR/2931 | Various mass mailing,  | Newspaper advertising and         | Fair |
| 28 | 2002[36] |               | prostatic   | of participants | descriptive  |              | media, health service  | stories, and mass mailings were   |      |
| 29 |          |               | hyperplasia |                 |              |              | referral and           | the most effective recruitment    |      |
| 30 |          |               | treatment   |                 |              |              | community outreach     | strategies.                       |      |
| 31 |          |               |             |                 |              |              | strategies             |                                   |      |
| 32 |          |               |             |                 |              |              |                        |                                   |      |
| 33 |          |               |             |                 |              |              |                        |                                   |      |
| 34 |          |               |             |                 |              |              |                        |                                   |      |
| 35 |          |               |             |                 |              |              |                        |                                   |      |
| 36 |          |               |             |                 |              |              |                        |                                   |      |
| 37 |          |               |             |                 |              |              |                        |                                   |      |
| 38 |          |               |             |                 |              |              |                        |                                   |      |
| 39 |          |               |             |                 |              |              |                        |                                   |      |
| 40 |          |               |             |                 |              |              |                        |                                   |      |
| 41 |          |               |             |                 |              |              |                        |                                   |      |
| 42 | 10       |               |             |                 |              |              |                        |                                   |      |
| 43 |          |               |             |                 |              |              |                        |                                   |      |
| 44 |          |               |             |                 |              |              |                        |                                   |      |
| 45 |          |               |             |                 |              |              |                        |                                   |      |
| 46 |          |               |             |                 |              |              |                        |                                   |      |
| 47 |          |               |             |                 |              |              |                        |                                   |      |

1  
2  
3  
4  
5  
6  
7  
8  
9  
10  
11  
12  
13  
14  
15  
16  
17  
18  
19  
20  
21  
22  
23  
24  
25  
26  
27  
28  
29  
30  
31  
32  
33  
34  
35  
36  
37  
38  
39  
40  
41  
42  
43  
44  
45  
46  
47

|                    |                       |                                        |                                     |                          |                           |                                                                                                            |                                                                                                                                                                       |      |
|--------------------|-----------------------|----------------------------------------|-------------------------------------|--------------------------|---------------------------|------------------------------------------------------------------------------------------------------------|-----------------------------------------------------------------------------------------------------------------------------------------------------------------------|------|
| Lee, 2011[37]      | CAMUS                 | Benign prostatic hyperplasia treatment | Identification of participants      | Quantitative descriptive | 1032/NR/369               | Various mass mailing, media, health service referral and community outreach strategies                     | Newspaper, radio and online advertising, and mass mailing were the most effective recruitment strategies. Emailing was less effective than traditional mailing.       | Fair |
| Moinpour, 2000[38] | PCPT                  | Prostate cancer prevention             | Identification of participants      | Before and after         | NR/NR/18,822 <sup>2</sup> | Site-directed minority-targeted recruitment strategies conducted by funded minority recruiter site staff   | Minority-targeted recruitment strategies were not effective at four of the five sites awarded funds for a minority recruiter.                                         | Poor |
| Donovan, 2002[39]  | PROTECT (feasibility) | Prostate cancer treatment              | Participant information and consent | Before and after         | NR/155/108                | Site training and guidance documents to address recruitment issues identified through qualitative research | Recruitment rates increased after introduction of the recruitment-focused site training and guidance.                                                                 | Fair |
| Donovan, 2003[40]  | PROTECT (feasibility) | Prostate cancer treatment              | Participant information and consent | RCT                      | NR/ 167/103               | Recruitment visit conducted by nurse vs recruitment visit conducted by urologist                           | Recruitment rates in the urologist and the nurse groups were not significantly different. Recruitment by nurse was more cost-effective than recruitment by urologist. | Good |

|    |                      |                          |                                                            |                                                                                                                    |                     |                           |                                                                                                                                                    |                                                                                                                                                                                                                                                                                                       |      |
|----|----------------------|--------------------------|------------------------------------------------------------|--------------------------------------------------------------------------------------------------------------------|---------------------|---------------------------|----------------------------------------------------------------------------------------------------------------------------------------------------|-------------------------------------------------------------------------------------------------------------------------------------------------------------------------------------------------------------------------------------------------------------------------------------------------------|------|
| 1  |                      |                          |                                                            |                                                                                                                    |                     |                           |                                                                                                                                                    |                                                                                                                                                                                                                                                                                                       |      |
| 2  |                      |                          |                                                            |                                                                                                                    |                     |                           |                                                                                                                                                    |                                                                                                                                                                                                                                                                                                       |      |
| 3  |                      |                          |                                                            |                                                                                                                    |                     |                           |                                                                                                                                                    |                                                                                                                                                                                                                                                                                                       |      |
| 4  |                      |                          |                                                            |                                                                                                                    |                     |                           |                                                                                                                                                    |                                                                                                                                                                                                                                                                                                       |      |
| 5  | Donovan,<br>2009[41] | PROTECT                  | Prostate<br>cancer<br>treatment                            | Participant<br>information<br>and consent                                                                          | Before and<br>after | NR/2664/1643 <sup>2</sup> | Site training and<br>guidance documents<br>to address<br>recruitment issues<br>identified through<br>qualitative research                          | Recruitment rates fell slightly<br>after introduction of the<br>recruitment-focused site<br>training and guidance.                                                                                                                                                                                    | Fair |
| 6  |                      |                          |                                                            |                                                                                                                    |                     |                           |                                                                                                                                                    |                                                                                                                                                                                                                                                                                                       |      |
| 7  |                      |                          |                                                            |                                                                                                                    |                     |                           |                                                                                                                                                    |                                                                                                                                                                                                                                                                                                       |      |
| 8  |                      |                          |                                                            |                                                                                                                    |                     |                           |                                                                                                                                                    |                                                                                                                                                                                                                                                                                                       |      |
| 9  |                      |                          |                                                            |                                                                                                                    |                     |                           |                                                                                                                                                    |                                                                                                                                                                                                                                                                                                       |      |
| 10 |                      |                          |                                                            |                                                                                                                    |                     |                           |                                                                                                                                                    |                                                                                                                                                                                                                                                                                                       |      |
| 11 |                      |                          |                                                            |                                                                                                                    |                     |                           |                                                                                                                                                    |                                                                                                                                                                                                                                                                                                       |      |
| 12 | Eccles,<br>2013[42]  | SABRE 1<br>(feasibility) | Prostate<br>cancer<br>treatment                            | Participant<br>information<br>and consent                                                                          | RCT                 | 286/30/4                  | 30-minute decision aid<br>video providing trial<br>information vs control<br>(standard information)                                                | Too few participants were<br>recruited to assess effectiveness<br>of the decision aid video. Some<br>indication that the video may<br>have decreased the recruitment<br>rate when compared to control.                                                                                                | Fair |
| 13 |                      |                          |                                                            |                                                                                                                    |                     |                           |                                                                                                                                                    |                                                                                                                                                                                                                                                                                                       |      |
| 14 |                      |                          |                                                            |                                                                                                                    |                     |                           |                                                                                                                                                    |                                                                                                                                                                                                                                                                                                       |      |
| 15 |                      |                          |                                                            |                                                                                                                    |                     |                           |                                                                                                                                                    |                                                                                                                                                                                                                                                                                                       |      |
| 16 |                      |                          |                                                            |                                                                                                                    |                     |                           |                                                                                                                                                    |                                                                                                                                                                                                                                                                                                       |      |
| 17 |                      |                          |                                                            |                                                                                                                    |                     |                           |                                                                                                                                                    |                                                                                                                                                                                                                                                                                                       |      |
| 18 |                      |                          |                                                            |                                                                                                                    |                     |                           |                                                                                                                                                    |                                                                                                                                                                                                                                                                                                       |      |
| 19 | Wallace,<br>2006[43] | SPIRIT                   | Prostate<br>cancer<br>treatment                            | Participant<br>information<br>and consent                                                                          | Before and<br>after | NR/290/32                 | Multi-disciplinary<br>group information<br>session prior to<br>recruitment vs one-<br>on-one recruitment<br>visit                                  | Recruitment rates increased<br>after introduction of the multi-<br>disciplinary group information<br>sessions.                                                                                                                                                                                        | Fair |
| 20 |                      |                          |                                                            |                                                                                                                    |                     |                           |                                                                                                                                                    |                                                                                                                                                                                                                                                                                                       |      |
| 21 |                      |                          |                                                            |                                                                                                                    |                     |                           |                                                                                                                                                    |                                                                                                                                                                                                                                                                                                       |      |
| 22 |                      |                          |                                                            |                                                                                                                    |                     |                           |                                                                                                                                                    |                                                                                                                                                                                                                                                                                                       |      |
| 23 |                      |                          |                                                            |                                                                                                                    |                     |                           |                                                                                                                                                    |                                                                                                                                                                                                                                                                                                       |      |
| 24 |                      |                          |                                                            |                                                                                                                    |                     |                           |                                                                                                                                                    |                                                                                                                                                                                                                                                                                                       |      |
| 25 |                      |                          |                                                            |                                                                                                                    |                     |                           |                                                                                                                                                    |                                                                                                                                                                                                                                                                                                       |      |
| 26 |                      |                          |                                                            |                                                                                                                    |                     |                           |                                                                                                                                                    |                                                                                                                                                                                                                                                                                                       |      |
| 27 | Ford,<br>2004[44]    | PLCO/AAMEN<br>project    | Prostate,<br>lung and<br>colorectal<br>cancer<br>screening | Identification<br>of<br>participants,<br>assessment of<br>eligibility and<br>patient<br>information<br>and consent | RCT                 | 17,770/12,400/<br>376     | Three recruitment<br>approaches of<br>increasing intensity<br>targeted at African<br>American men,<br>compared to standard<br>recruitment approach | The most intensive approach to<br>screening, which included face-<br>to-face screening in a church<br>setting, resulted in a higher<br>recruitment rate than control.<br>The improvement was<br>statistically significant but small.<br>Other less intense approaches<br>were no better than control. | Fair |
| 28 |                      |                          |                                                            |                                                                                                                    |                     |                           |                                                                                                                                                    |                                                                                                                                                                                                                                                                                                       |      |
| 29 |                      |                          |                                                            |                                                                                                                    |                     |                           |                                                                                                                                                    |                                                                                                                                                                                                                                                                                                       |      |
| 30 |                      |                          |                                                            |                                                                                                                    |                     |                           |                                                                                                                                                    |                                                                                                                                                                                                                                                                                                       |      |
| 31 |                      |                          |                                                            |                                                                                                                    |                     |                           |                                                                                                                                                    |                                                                                                                                                                                                                                                                                                       |      |
| 32 |                      |                          |                                                            |                                                                                                                    |                     |                           |                                                                                                                                                    |                                                                                                                                                                                                                                                                                                       |      |
| 33 |                      |                          |                                                            |                                                                                                                    |                     |                           |                                                                                                                                                    |                                                                                                                                                                                                                                                                                                       |      |
| 34 |                      |                          |                                                            |                                                                                                                    |                     |                           |                                                                                                                                                    |                                                                                                                                                                                                                                                                                                       |      |
| 35 |                      |                          |                                                            |                                                                                                                    |                     |                           |                                                                                                                                                    |                                                                                                                                                                                                                                                                                                       |      |
| 36 |                      |                          |                                                            |                                                                                                                    |                     |                           |                                                                                                                                                    |                                                                                                                                                                                                                                                                                                       |      |
| 37 |                      |                          |                                                            |                                                                                                                    |                     |                           |                                                                                                                                                    |                                                                                                                                                                                                                                                                                                       |      |
| 38 |                      |                          |                                                            |                                                                                                                    |                     |                           |                                                                                                                                                    |                                                                                                                                                                                                                                                                                                       |      |
| 39 |                      |                          |                                                            |                                                                                                                    |                     |                           |                                                                                                                                                    |                                                                                                                                                                                                                                                                                                       |      |
| 40 |                      |                          |                                                            |                                                                                                                    |                     |                           |                                                                                                                                                    |                                                                                                                                                                                                                                                                                                       |      |
| 41 |                      |                          |                                                            |                                                                                                                    |                     |                           |                                                                                                                                                    |                                                                                                                                                                                                                                                                                                       |      |
| 42 |                      |                          |                                                            |                                                                                                                    |                     |                           |                                                                                                                                                    |                                                                                                                                                                                                                                                                                                       |      |
| 43 |                      |                          |                                                            |                                                                                                                    |                     |                           |                                                                                                                                                    |                                                                                                                                                                                                                                                                                                       |      |
| 44 |                      |                          |                                                            |                                                                                                                    |                     |                           |                                                                                                                                                    |                                                                                                                                                                                                                                                                                                       |      |
| 45 |                      |                          |                                                            |                                                                                                                    |                     |                           |                                                                                                                                                    |                                                                                                                                                                                                                                                                                                       |      |
| 46 |                      |                          |                                                            |                                                                                                                    |                     |                           |                                                                                                                                                    |                                                                                                                                                                                                                                                                                                       |      |
| 47 |                      |                          |                                                            |                                                                                                                    |                     |                           |                                                                                                                                                    |                                                                                                                                                                                                                                                                                                       |      |

1  
2  
3  
4  
5  
6  
7  
8  
9  
10  
11  
12  
13  
14  
15  
16  
17  
18  
19  
20  
21  
22  
23  
24  
25  
26  
27  
28  
29  
30  
31  
32  
33  
34  
35  
36  
37  
38  
39  
40  
41  
42  
43  
44  
45  
46  
47

|                |         |                           |                                                                   |                  |                           |                                       |                                                                                                                                                                                                                                                                                                              |      |
|----------------|---------|---------------------------|-------------------------------------------------------------------|------------------|---------------------------|---------------------------------------|--------------------------------------------------------------------------------------------------------------------------------------------------------------------------------------------------------------------------------------------------------------------------------------------------------------|------|
| Lane, 2011[45] | PROTECT | Prostate cancer treatment | Assessment of eligibility and participant information and consent | Before and after | NR/2664/1643 <sup>2</sup> | Peer-conducted site monitoring visits | Recruitment issues were identified at two out of eight monitored sites. Specific recruitment metrics (consent form return rate, reduction in health-related exclusions) improved at these two sites following monitoring. The impact of the monitoring intervention on overall recruitment was not reported. | Poor |
|----------------|---------|---------------------------|-------------------------------------------------------------------|------------------|---------------------------|---------------------------------------|--------------------------------------------------------------------------------------------------------------------------------------------------------------------------------------------------------------------------------------------------------------------------------------------------------------|------|

NR = not reported

<sup>1</sup> Refers to number of participants screened (including pre-screening), eligible (approached for consent) and randomised to the host RCT as part of the recruitment study

<sup>2</sup> Study did not report number of participants included in the recruitment evaluation. Instead total numbers of participants in host RCT are reported

For peer review only

### Study characteristics

The characteristics of included studies are described in Table 2. As one might expect in trials recruiting exclusively older men, most selected studies reported recruitment to prostate cancer trials (10 studies), with other studies reporting recruitment to trials in other cancers, benign prostatic hyperplasia, low testosterone and suicide prevention. Three studies focused on the recruitment of men from minority ethnic groups. Recruitment studies ranged in size from 155 to 51,085 participants and most commonly used a quantitative descriptive design.

Table 2: Summary characteristics of included studies

| Description                                   | No of studies |
|-----------------------------------------------|---------------|
| Therapeutic area of host RCT                  |               |
| Cancer - prostate                             | 11            |
| Benign prostatic hyperplasia                  | 2             |
| Testosterone                                  | 1             |
| Suicide                                       | 1             |
| Cancer – various                              | 1             |
| Host RCT type                                 |               |
| Treatment                                     | 10            |
| Prevention                                    | 5             |
| Screening                                     | 1             |
| Recruitment study design                      |               |
| Quantitative descriptive                      | 10            |
| Randomised controlled trial                   | 3             |
| Before and after study                        | 2             |
| Non-randomised controlled study               | 1             |
| No of study participants in recruitment study |               |
| 0–999                                         | 6             |
| 1000–4999                                     | 5             |
| 5000–9999                                     | 2             |
| 10,000+                                       | 3             |
| <b>TOTAL recruitment studies included</b>     | <b>16</b>     |

### Quality assessment

Most (10 of 16) studies were assessed as being of fair quality in relation to the recruitment outcomes of interest in this review. One study was evaluated as good, and five were evaluated as poor. The quality assessments of the included studies are shown in Table 1, and quality assessment checklists are included in the supplementary files. In general, all studies addressed a clear study



1  
2  
3 question and enrolled a representative sample of participants. Recruitment outcomes were reliably  
4  
5 measured and clearly reported, although few studies reported recruitment cost. However, the  
6  
7 description and measurement of intervention delivery were often incomplete or missing. Some  
8  
9 studies reported that interventions were delivered inconsistently across study sites, but this  
10  
11 inconsistency was not accounted for in the reporting of outcomes. This limitation made comparisons  
12  
13 within and between studies problematic. Possible confounding was also a common issue. Of the 16  
14  
15 recruitment studies, only three had a randomised design, and one additional, non-randomised study  
16  
17 reported baseline demographic data by intervention group. In the remaining 12 studies, differences  
18  
19 between the intervention groups in baseline characteristics could not be assessed. Therefore,  
20  
21 differences in recruitment between groups may have been influenced by the characteristics of the  
22  
23 individuals studied rather than the interventions evaluated. Furthermore, in some studies, several  
24  
25 recruitment activities were implemented concurrently, but no study discussed the possible impact of  
26  
27 this on the observed recruitment outcomes. Another common limitation was the lack of prospective  
28  
29 study design. Three studies reported a prospective design; six reported a retrospective design and  
30  
31 the remaining seven did not specify.  
32  
33

34  
35 One study, which was otherwise of good quality, was assessed as fair due to inadequate sample  
36  
37 size.[42] Another study that was otherwise of fair quality was assessed as poor because the  
38  
39 recruitment outcomes of interest to this review were not adequately reported even though other  
40  
41 qualitative and non-recruitment-related outcomes (feedback from site staff and overall site  
42  
43 performance metrics) were well reported.[45]  
44  
45

#### 46 **Stages of recruitment and associated outcomes**

47  
48  
49 The included studies addressed three recruitment stages: (i) identification of prospective  
50  
51 participants, (ii) assessment of eligibility, and (iii) provision of participant information combined with  
52  
53 seeking of consent. The strategies addressing each stage of recruitment are summarised below along  
54  
55 with their reported recruitment outcomes. Outcomes are shown in Table 3 (studies that reported  
56  
57  
58  
59

1  
2  
3 strategy uptake), Table 4 (studies that reported strategy contribution) and Table 5 (studies that  
4  
5 reported strategy cost).  
6  
7  
8  
9  
10  
11  
12  
13  
14  
15  
16  
17  
18  
19  
20  
21  
22  
23  
24  
25  
26  
27  
28  
29  
30  
31  
32  
33  
34  
35  
36  
37  
38  
39  
40  
41  
42  
43  
44  
45  
46  
47  
48  
49  
50  
51  
52  
53  
54  
55  
56  
57  
58  
59  
60

For peer review only

Table 3: Strategy uptake in included studies<sup>1</sup>

| Author, year                                           | Intervention/s                                                                                             | # Received recruitment intervention | # Randomised to host RCT (%) | Statistical testing | Statistically significant? |
|--------------------------------------------------------|------------------------------------------------------------------------------------------------------------|-------------------------------------|------------------------------|---------------------|----------------------------|
| Recruitment stage: Identification of participants      |                                                                                                            |                                     |                              |                     |                            |
| Bhar, 2013[30]                                         | Referrals from co-investigator's Veteran's Affairs mental health clinic                                    | 63                                  | 24 (38%)                     |                     |                            |
|                                                        | Referrals from psychiatric outpatient clinic                                                               | 18                                  | 3 (17%)                      |                     |                            |
|                                                        | Mass mailing to primary care patients mailing list                                                         | 869                                 | 6 (1%)                       |                     |                            |
|                                                        | Referrals from inpatient psychiatric unit                                                                  | 5                                   | 0 (0%)                       |                     |                            |
|                                                        | Referrals from primary care physicians                                                                     | 0                                   | 0 (N/A)                      | NR                  | NR                         |
| Chlebowski, 2010[32]                                   | Mass mailing to male homeowners                                                                            | 60,000                              | 600 (1%)                     |                     |                            |
|                                                        | Mass mailing to spouses of previous female research participant                                            | 800                                 | 34 (4%)                      | NR                  | NR                         |
| Heiney, 2010[34]                                       | Referral by physician                                                                                      | 24                                  | 13 (54%)                     |                     |                            |
|                                                        | Referral from previous health research study                                                               | 206                                 | 11 (5%)                      |                     |                            |
|                                                        | Mass mailing to oncology clinic list                                                                       | 1,384                               | 15 (1%)                      |                     |                            |
|                                                        | Mass mailing to urology clinic list                                                                        | 759                                 | 8 (1%)                       |                     |                            |
|                                                        | Mass mailing to support services department list                                                           | 350                                 | 2 (1%)                       |                     |                            |
|                                                        | Posters, newspaper articles, other                                                                         | NR                                  | 10 (N/A)                     | NR                  | NR                         |
| Lee, 2011[37]                                          | Mass mailing by post to former trial participants, health system users and commercial direct mailing lists | 34,064                              | 143 (0.4%)                   |                     |                            |
|                                                        | Newspaper, radio and online advertising                                                                    | NR                                  | 129 (N/A)                    |                     |                            |
|                                                        | Mass mailing by email to university employees, physicians, database of people interested in research       | 35,000                              | 31 (0.1%)                    |                     |                            |
|                                                        | Referral from urology clinic                                                                               | 63                                  | 30 (48%)                     |                     |                            |
|                                                        | Posters and flyers                                                                                         | NR                                  | 8 (N/A)                      |                     |                            |
|                                                        | Other                                                                                                      | NR                                  | 28 (N/A)                     | NR                  | NR                         |
| Recruitment stage: Participant information and consent |                                                                                                            |                                     |                              |                     |                            |
| Donovan, 2002[39]                                      | Before: Not specified                                                                                      | 30                                  | NR ("30-40%")                |                     |                            |

|                                                                                                                                     |                                                                                                                                                         |                              |                                          |                                         |     |
|-------------------------------------------------------------------------------------------------------------------------------------|---------------------------------------------------------------------------------------------------------------------------------------------------------|------------------------------|------------------------------------------|-----------------------------------------|-----|
|                                                                                                                                     | After: Recruitment training and documentation informed by qualitative research                                                                          | 155                          | 108 (70%)                                | NR                                      | NR  |
| Donovan, 2003[40]                                                                                                                   | Recruitment visit conducted by urologist                                                                                                                | 75                           | 53 (71%)                                 |                                         |     |
|                                                                                                                                     | Recruitment visit conducted by nurse                                                                                                                    | 75                           | 50 (67%)                                 | RD=4% (95% CI -10.8%, +18.8%<br>p=0.60) | No  |
| Donovan, 2009[41]                                                                                                                   | Before: Standard recruitment training and documentation                                                                                                 | NR                           | NR (69%)                                 |                                         |     |
|                                                                                                                                     | After: Recruitment training and documentation informed by qualitative research                                                                          | NR                           | NR (65%)                                 | NR                                      | NR  |
|                                                                                                                                     | Before: No site review                                                                                                                                  | Centre A: 24<br>Centre B: 46 | Centre A: 11 (45%)<br>Centre B: 23 (50%) |                                         |     |
|                                                                                                                                     | After: Recruitment-focused site review triggered by low performance                                                                                     | Centre A: 14<br>Centre B: 40 | Centre A: 12 (86%)<br>Centre B: 31 (78%) | Centre A: p=0.020<br>Centre B: p=0.013  | Yes |
| Eccles, 2013[42]                                                                                                                    | Standard study information at recruitment visit                                                                                                         | 15                           | 3 (20%)                                  |                                         |     |
|                                                                                                                                     | Decision aid video at recruitment visit                                                                                                                 | 15                           | 1 (7%)                                   | NR                                      | NR  |
| Wallace, 2006[43]                                                                                                                   | Before: one-on-one information session                                                                                                                  | 27                           | 0 (0%)                                   |                                         |     |
|                                                                                                                                     | After: Multi-disciplinary group information session                                                                                                     | 263                          | 32 (12%)                                 | NR                                      | NR  |
| Recruitment stage: Multiple stages (Identification of participants, assessment of eligibility, participant information and consent) |                                                                                                                                                         |                              |                                          |                                         |     |
| Ford, 2004[44]                                                                                                                      | Arm A: Enhanced mailed invitation, telephone screening by African American interviewer, collection of baseline data by mail                             | 3079                         | 78 (3%)                                  | Arm A v Arm D:<br>p<0.01                | Yes |
|                                                                                                                                     | Arm B: Enhanced mailed invitation, telephone screening by African American interviewer, collection of baseline data by phone                            | 3075                         | 87 (3%)                                  |                                         |     |
|                                                                                                                                     | Arm C: Enhanced mailed invitation, telephone screening by African American interviewer, collection of baseline data in person at church project session | 2949                         | 116 (4%)                                 |                                         |     |
|                                                                                                                                     | Arm D (control): Standard mailed invitation, telephone screening by African American or Caucasian interviewer,                                          | 3297                         | 95 (3%)                                  | Difference between arms B,              | No  |

1  
2  
3  
4  
5  
6  
7  
8  
9  
10  
11  
12  
13  
14  
15  
16  
17  
18  
19  
20  
21  
22  
23  
24  
25  
26  
27  
28  
29  
30  
31  
32  
33  
34  
35  
36  
37  
38  
39  
40  
41  
42  
43  
44  
45  
46  
47

collection of baseline data by mail

C and D: p=0.66

<sup>1</sup> Strategy uptake defined as the percentage of people receiving the recruitment intervention who went on to be randomised to the host RCT. Studies that did not report the number of participants receiving the recruitment intervention excluded. Poor quality studies excluded.  
NR = not reported

For peer review only

Table 4: Contribution of participant identification strategies to recruitment<sup>1</sup>

| Author, year         | Type of intervention    | Details                                                                              | # screened | # randomised (% of screened) | Contribution % <sup>2</sup> |
|----------------------|-------------------------|--------------------------------------------------------------------------------------|------------|------------------------------|-----------------------------|
| Bhar, 2013[30]       | Health service referral | Co-investigator's Veteran's Affairs mental health clinic                             | 45         | 24 (53%)                     | 73%                         |
|                      | Mass mailing            | Primary care patients mailing list                                                   | 174        | 6 (3%)                       | 18%                         |
|                      | Health service referral | Psychiatric outpatient clinic                                                        | 12         | 3 (25%)                      | 9%                          |
|                      | Health service referral | Inpatient psychiatric unit                                                           | 2          | 0 (0%)                       | 0%                          |
|                      | Health service referral | Primary care physicians                                                              | 0          | 0 (0%)                       | 0%                          |
| Chlebowski, 2010[32] | Mass mailing            | Male homeowners                                                                      | 3961       | 600 (15%)                    | 95%                         |
|                      | Mass mailing            | Spouses of previous female research participant                                      | 61         | 34 (56%)                     | 5%                          |
| Heiney, 2010[34]     | Mass mailing            | Oncology clinic list                                                                 | 78         | 15 (19%)                     | 25%                         |
|                      | Health service referral | Physician                                                                            | 24         | 13 (54%)                     | 22%                         |
|                      | Health service referral | Previous health research study                                                       | 161        | 11 (7%)                      | 19%                         |
|                      | Other                   | Posters, newspaper articles, other                                                   | 33         | 10 (30%)                     | 17%                         |
|                      | Mass mailing            | Urology clinic list                                                                  | 52         | 8 (15%)                      | 14%                         |
|                      | Mass mailing            | Support services department list                                                     | 12         | 2 (17%)                      | 3%                          |
| Kusek, 2002[36]      | Media                   | Newspaper advertising and new stories                                                | 1,140      | 876 (77%)                    | 30%                         |
|                      | Mass mailing            | Department of Motor Vehicles, screening lists and patient databases                  | 1,022      | 783 (77%)                    | 27%                         |
|                      | Health service referral | Urology clinic                                                                       | 361        | 280 (78%)                    | 10%                         |
|                      | Media                   | Radio advertising                                                                    | 326        | 257 (79%)                    | 9%                          |
|                      | Media                   | Inclusion in newsletters to military retirees and participating medical institutions | 325        | 245 (75%)                    | 8%                          |

1  
2  
3  
4  
5  
6  
7  
8  
9  
10  
11  
12  
13  
14  
15  
16  
17  
18  
19  
20  
21  
22  
23  
24  
25  
26  
27  
28  
29  
30  
31  
32  
33  
34  
35  
36  
37  
38  
39  
40  
41  
42  
43  
44  
45  
46  
47

|               |                         |                                                                                                         |     |           |     |
|---------------|-------------------------|---------------------------------------------------------------------------------------------------------|-----|-----------|-----|
|               | Media                   | Television news stories and public service announcements                                                | 223 | 192 (86%) | 7%  |
|               | Other                   | Word of mouth                                                                                           | 150 | 122 (81%) | 4%  |
|               | Community outreach      | Poster/display                                                                                          | 132 | 94 (71%)  | 3%  |
|               | Other                   | Not specified/unknown                                                                                   | 461 | 57 (12%)  | 2%  |
|               | Community outreach      | Prostate health screening event                                                                         | 30  | 25 (83%)  | 1%  |
| Lee, 2011[37] | Mass mailing            | Postal invite - former trial participants, health system users and commercial direct mailing lists      | 608 | 143 (24%) | 39% |
|               | Media                   | Newspaper, radio and online advertising                                                                 | 273 | 129 (47%) | 35% |
|               | Mass mailing            | Email invite - university employees, physicians, database of people who registered interest in research | 87  | 31 (36%)  | 8%  |
|               | Health service referral | Urology clinic (chart review)                                                                           | 52  | 30 (58%)  | 8%  |
|               | Other                   | Not specified                                                                                           | NR  | 28 (NR)   | 8%  |
|               | Community outreach      | Posters and flyers                                                                                      | 12  | 8 (67%)   | 2%  |

<sup>1</sup> Poor quality studies excluded

<sup>2</sup> Contribution defined as the percentage of all participants randomised to the host RCT who were randomised as a result of a particular recruitment strategy

Table 5: Cost of recruitment strategies <sup>1</sup>

| Author, year         | Cost metric reported                                             | Recruitment phase                   | Intervention/s                                                                      | # randomised | Total cost  | Cost metric per participant |
|----------------------|------------------------------------------------------------------|-------------------------------------|-------------------------------------------------------------------------------------|--------------|-------------|-----------------------------|
| Bhar, 2013[30]       | Total cost (direct and indirect cost) per participant randomised | Identification of participants      | Mass mailing - primary care patients mailing list                                   | 6            | US\$3,813   | US\$636                     |
|                      |                                                                  |                                     | Health services referral - co-investigator's Veteran's Affairs mental health clinic | 24           | US\$1,066   | US\$44                      |
|                      |                                                                  |                                     | Health services referral - psychiatric outpatient clinic                            | 3            | US\$497     | US\$166                     |
|                      |                                                                  |                                     | Health services referral - primary care physicians                                  | 0            | US\$643     | N/A                         |
|                      |                                                                  |                                     | Health services referral - inpatient psychiatric unit                               | 0            | US\$519     | N/A                         |
| Chlebowski, 2010[32] | Direct cost per participant randomised                           | Identification of participants      | Mass mailing - male homeowners                                                      | 600          | US\$155,596 | US\$259                     |
|                      |                                                                  |                                     | Mass mailing - spouses of previous female participant                               | 34           | US\$2,000   | US\$59                      |
| Donovan, 2003[40]    | Cost of staff time per participant approached                    | Participant information and consent | Recruitment visit performed by urologist                                            | 53           | NR          | £43.29                      |
|                      |                                                                  |                                     | Recruitment visit performed by nurse                                                | 50           | NR          | £36.40                      |

<sup>1</sup> Poor quality studies excluded



### Identification of prospective participants

Participant identification strategies were evaluated in nine studies.[30-38] Excluding poor quality studies, all studies reported the contribution of participant identification strategies to enrolment (shown in Table 4) while only four studies reported strategy uptake (shown in Table 3) and two studies reported strategy cost (Table 5). Within the participant identification category, we further grouped strategies as mass mailings, media coverage and advertising, health service referrals, or community outreach activities. This categorisation was adapted from previous recruitment research.[46,47] The data from Table 4 have been summarised in Table 6 to aid comparison between studies. The most frequently evaluated strategy were mass mailings and community outreach strategies (seven studies). Media strategies were evaluated in six studies and health service referrals in five studies.

Table 6: A summary of the contribution of participant identifications strategies to RCT recruitment <sup>1,2</sup>

|                      | Mass mailing | Media coverage & advertising | Health service referrals | Community outreach | Other, unspecified, unknown | Total # participants enrolled |
|----------------------|--------------|------------------------------|--------------------------|--------------------|-----------------------------|-------------------------------|
| Kusek, 2002[36]      | 783 (27%)    | 1570 (54%)                   | 280 (10%)                | 119 (4%)           | 179 (6%)                    | 2,931(100%)                   |
| Chlebowski, 2010[32] | 634 (100%)   | --                           | --                       | --                 | --                          | 634 (100%)                    |
| Lee, 2011[37]        | 174 (47%)    | 129 (35%)                    | 30 (8%)                  | 8 (2%)             | 28 (8%)                     | 369 (100%)                    |
| Heiney, 2010[34]     | 25 (42%)     | NR                           | 24 (41%)                 | NR                 | --                          | 59 (100%)                     |
| Bhar, 2013[30]       | 6 (18%)      | --                           | 27 (82%)                 | --                 | --                          | 33 (100%)                     |

<sup>1</sup> Contribution defined as the number of participants randomised as a result of each strategy (percentage of all participants randomised)

<sup>2</sup> Poor quality studies excluded

NR = not reported separately. In total, media and community strategies accounted for 17% of enrolled participants in this study.

## Mass mailing

Recruitment by mass mailing involved sending study information and a letter of invitation to the members of one or more acquired mailing lists. Seven studies sent postal invitations[30-34,36,37] and one study also sent email invitations.[37] Mailing lists were obtained from a variety of sources including the Department of Veterans Affairs database, Department of Motor Vehicles database, homeowner database, participant lists from previous health research, patient databases, commercial mailing lists, volunteer databases and lists of physicians and university employees.

Excluding poor studies, mailing referrals contributed 18-100% of enrolled participants in the studies that used mailings.[30,32,34,36,37] Uptake was very low across all studies (0.09%-1.0% of mail recipients went on to be randomised to the host RCT).[30,32,34,37] The direct cost of mailings ranged from \$59 to \$259 per participant enrolled.[30,32] In one study, postal invitations had a higher uptake than email invitations (0.4% of mail recipients enrolled vs 0.1% of email recipients).[37] However, mail and email lists were drawn from dissimilar populations making a direct, unadjusted comparison problematic.

In one study,[32] mailing women who were past research participants and asking them to invite their spouses resulted in higher recruitment uptake (4.3% vs 1.0% enrolled) and lower cost per participant (\$59 per enrolment vs \$259 per enrolment) compared to mailing men on a homeowners database. However, the homeowners mailing list was much larger than the past-participant mailing list (60,000 vs 800 members), and so 95% of participants were recruited through the homeowners mailing list despite the lower uptake rate.[32]

## Media coverage and advertising

Six studies[31,33-37] described a variety of media strategies including news stories on television[36] and in newspapers,[34] advertising on television,[31,35,36] radio[31,36,37] and in

1  
2  
3 newspapers;[31,35-37] listing the study on the clinicaltrials.gov website;[31,35] other online  
4  
5 advertising;[37] and inclusion in military retiree and medical institution newsletters.[36]  
6

7  
8 Two studies reported that media strategies were effective, accounting for 35%[37] and 54%[36] of  
9  
10 enrolments. The remaining four studies were excluded for poor quality or lack of media-related  
11  
12 outcome reporting. One study[36] reported that newspapers were the largest source of recruited  
13  
14 participants (30%) followed by radio (9%), newsletters (8%) and television (7%). Although five  
15  
16 studies mentioned using paid advertising only one poor quality study[31] reported costs with  
17  
18 television being the cheapest (\$46 per screening), followed by radio advertising (\$51 per screening)  
19  
20 and print most expensive (\$105 per screening). All were more expensive than mass mailing (\$38 per  
21  
22 screening).  
23

#### 24 25 Health service referral

26  
27  
28 Health service referral was defined as identification of prospective participants by a health service  
29  
30 provider. Only strategies which involved the health service provider having performed some initial  
31  
32 screening were included. Where mass mail outs were performed using clinic lists without prior  
33  
34 clinical screening, these were categorised as a mass mailing. Five studies[30,34-37] sought referrals  
35  
36 from a variety of sources including outpatient clinics and medical centres, physicians (both site  
37  
38 investigators and community physicians), hospital inpatient lists and lists of previous prostate cancer  
39  
40 research participants.  
41

42  
43  
44 In studies of fair quality, the health service referral sources fell into two broad categories; those that  
45  
46 were affiliated with a study site (i.e. referrals through an existing clinical pathway or a study  
47  
48 investigator's clinic) and those that were not. For studies that could draw referrals from affiliated  
49  
50 health services,[30,34] health service referral was the most effective participant referral strategy  
51  
52 contributing 41%[34] and 82%[30] of participants. For the remaining two studies, which sought  
53  
54  
55  
56  
57  
58  
59  
60

1  
2  
3 referrals from health services not linked to the study, health services referrals were comparatively  
4 ineffective, contributing only 8%<sup>[37]</sup> and 10%<sup>[36]</sup> of participants.  
5  
6

7  
8 Recruitment uptake from health services referral was generally higher than other strategies but was  
9 highly variable, ranging from 0% to 54% of referrals being randomised to the host RCT.<sup>[30,34,37]</sup>  
10  
11 Only one study<sup>[30]</sup> reported cost-effectiveness. Referrals from a variety of health services cost \$101  
12 per participant randomised on average (see Table 5 for details). Referral from an affiliated health  
13 service was the cheapest referral source (\$44 per participant randomised).<sup>[30]</sup>  
14  
15  
16  
17

#### 18 19 Community outreach

20  
21  
22 Seven studies evaluated community outreach strategies<sup>[31,33-38]</sup> including posters displayed in  
23 community locations and healthcare clinics, and presentations to health service providers and the  
24 public.  
25  
26  
27

28  
29 Two studies reported that community outreach activities were ineffective, accounting for only  
30 2%<sup>[37]</sup> and 4%<sup>[36]</sup> of participants. The remaining five studies were excluded due to poor quality or  
31 failure to report the outcome of community outreach activities.  
32  
33  
34  
35

#### 36 **Patient information and consent**

37  
38  
39 Five studies evaluated strategies to improve the patient information and consent process.<sup>[39-43]</sup>  
40  
41 The strategy uptake reported in each of these studies is shown in Table 3. The studies aimed to  
42 improve either the content of the information provided to the participant at the recruitment visit or  
43 the mechanism by which that information was provided. All studies in this category were hosted  
44 within prostate cancer treatment trials, perhaps reflecting the challenges inherent in recruiting  
45 participants to prostate cancer trials where treatment options may be diverse, e.g. surgery, radiation  
46 and watchful waiting.  
47  
48  
49  
50  
51  
52  
53  
54  
55  
56  
57  
58  
59  
60

1  
2  
3 Two papers evaluated a trial-specific recruitment training intervention delivered to site-based  
4 recruitment staff and implemented within the feasibility and main phases of the PROTECT  
5 trial.[39,41] The intervention involved audio-taping recruitment interviews and performing  
6 qualitative to investigate how trial information was delivered to participants at the recruitment visit  
7 and how this may impact consent rates. Results of this analysis then guided the development of the  
8 training intervention. After the implementation of the intervention, the recruitment rate was  
9 observed to increase from 30-40% to 70% during the feasibility stage and to remain between 69%  
10 and 65% during the main study. An evaluation of a secondary, intensive training process for  
11 underperforming sites found that recruitment rates increased from 45% to 86% ( $p=0.020$ ) at one site  
12 and from 50% to 78% ( $p=0.013$ ) at another site but numbers at these two sites were small.[41]  
13  
14 Other participant information and consent interventions were evaluated in one study each.  
15 Recruitment by nurses was found to be more cost-effective than recruitment by urologists (£36.40  
16 vs £43.29 per screening) and resulted in similar rates of consent (67% vs 71%  $p=0.60$ ).[40] Multi-  
17 disciplinary, group information sessions increased the consent rate from 0% to 16% when compared  
18 to a one-on-one recruitment consultation.[43] A 30-minute decision aid video presented at the  
19 recruitment visit may have reduced the consent rate in one study although the study was  
20 underpowered.[42]

### 21 22 23 24 25 26 27 28 29 30 31 32 33 34 35 36 37 38 39 40 **Strategies addressing multiple stages of the recruitment process**

41  
42  
43 Two studies evaluated strategies that addressed the recruitment process as a whole (identification  
44 of participants, assessment of eligibility, provision of participant information and seeking of consent)  
45 rather than one specific stage of recruitment. One study evaluated the impact of peer-conducted  
46 site monitoring visits on recruitment.[45] The study reported that of the eight sites visited  
47 monitoring identified specific recruitment process issues at two sites. After monitoring, one site  
48 altered their process for participant reminders and subsequently consent form return rates  
49 increased by 5%. At another site, monitoring uncovered that eligibility criteria were being incorrectly  
50  
51  
52  
53  
54  
55  
56  
57  
58  
59  
60

1  
2  
3 applied and subsequently incorrect exclusion of prospective participants decreased by 5%. While  
4 these improvements to site processes are likely to have improved recruitment, the study did not  
5 report the impact on overall recruitment.  
6  
7

8  
9  
10 Another study evaluated four different approaches to recruit African American men to a cancer  
11 screening trial.[44] The study found that the most intensive intervention (mailing invitation  
12 endorsed by African American community leader, phone screening by African American interviewer  
13 and gathering baseline information at a church-based group session with transport provided)  
14 increased recruitment uptake from 2.9% to 3.9% compared to control (standard mailed invitation,  
15 phone screening by African American or non-African American interviewer and collection of baseline  
16 forms by mail). While this difference was statistically significant ( $p < 0.01$ ), it was small in absolute  
17 magnitude, and the cost of the most intensive intervention is likely to have been high although cost  
18 data were not reported. Other approaches that included less intensive combinations of mailing  
19 invitation endorsed by an African American community leader, phone screening by African American  
20 interviewer and gathering baseline information by phone did not result in a statistically significant  
21 increase in recruitment uptake compared to control.  
22  
23  
24  
25  
26  
27  
28  
29  
30  
31  
32  
33  
34  
35

## 36 **DISCUSSION**

### 37 **Principal findings**

38  
39 In this review, we aimed to evaluate recruitment strategies for RCTs of men aged 50 years and older.  
40  
41 We found that the best approaches for identifying participants were referral through an affiliated  
42 health service provider, media coverage and mass mailings. Community outreach activities and  
43 referrals from unaffiliated health service providers were not effective strategies for improving  
44 recruitment. Recruitment was also improved by trial-specific training informed by qualitative  
45 analysis of the recruitment visit and delivered to site-based recruitment staff.  
46  
47  
48  
49  
50  
51  
52  
53  
54  
55  
56  
57  
58  
59  
60

1  
2  
3 Despite their frequency of use, community outreach activities had a limited effect on recruitment,  
4 perhaps because they likely reached fewer prospective participants than media and mailing  
5 strategies. The frequent use of community outreach strategies may be explained by the fact that,  
6 while time-consuming to conduct, they are straightforward from an ethical review perspective and  
7 are inexpensive in terms of direct cost. By contrast, mass media advertising may involve  
8 considerable direct cost[48], and online promotions (for example through Facebook or Google)  
9 involve additional ethical considerations[49] and are more technologically challenging to  
10 conduct.[50] While studies frequently reported recruitment through community outreach activities,  
11 none of the included studies described patient and public involvement (PPI) in the planning and  
12 design of promotional strategies and materials. This is an area for future research.[51]  
13  
14  
15  
16  
17  
18  
19  
20  
21  
22  
23

24 This review is strengthened by the adaption of the SEAR framework to categorise the included  
25 studies. Research into recruitment strategies is fragmented[5] and researchers seeking evidence-  
26 based solutions to their recruitment challenges may find the current evidence difficult to digest.  
27 Categorising studies according to the stage of the recruitment process rather than categorising by  
28 intervention characteristics has a number of advantages. Firstly, it is intuitive to use and understand  
29 since it mirrors real-world trial processes. Secondly, for researchers using the SEAR framework to  
30 collect recruitment data and identify recruitment challenges, our review provides a roadmap for  
31 navigating the available evidence and selecting the most promising interventions to address these  
32 challenges.  
33  
34  
35  
36  
37  
38  
39  
40  
41  
42  
43

44 By grouping studies according to the SEAR framework, our review uncovered inconsistencies in how  
45 strategies to identify prospective participants were evaluated. All studies in this category reported  
46 strategy contributions to overall recruitment but only four studies reported strategy uptake and two  
47 reported strategy costs. There was a lack of consensus across studies on which of these outcomes  
48 was most appropriate and it was unclear how studies decided whether strategies were effective or  
49 not. Intuitively, these three possible outcomes (contribution, uptake and cost) are, individually,  
50  
51  
52  
53  
54  
55  
56  
57  
58  
59  
60

1  
2  
3 insufficient to evaluate overall strategy effectiveness. For example, if a strategy contributed 80% of  
4  
5 study participants does this indicate that the strategy was effective or simply that few other  
6  
7 strategies were used? Likewise, if a strategy was low cost but resulted in few participants being  
8  
9 randomised was it more or less effective than an expensive strategy that delivered large numbers of  
10  
11 participants? Greater transparency in how strategies to identify participants are selected and  
12  
13 assessed, and the costs involved would assist with the interpretation of study results in this area.  
14  
15

### 16 **Limitations**

17  
18  
19 Of the estimated large number of men's health RCTs conducted worldwide since 2000, only 16  
20  
21 studies of recruitment strategy evaluation were found. Consequently, the review likely describes  
22  
23 only a small fraction of the recruitment practices used to recruit men aged 50 years and older to  
24  
25 RCTs and may be subject to publication bias. Despite this limitation, it is encouraging to note that  
26  
27 the review identified published accounts of both effective and ineffective strategies. The restriction  
28  
29 of our search to papers published since 2000 and the exclusion of studies reporting recruitment of  
30  
31 both men and women to RCTs may also have led to the exclusion of some useful evaluations.  
32  
33

### 34 **Implications for research**

35  
36  
37 Our review uncovered areas of uncertainty across all stages of the recruitment process. In the area  
38  
39 of participant identification, further evaluations are needed comparing media formats (television,  
40  
41 radio, newspaper, online and social media), evaluating the content of participant identification  
42  
43 materials and reporting the costs associated with media advertising and mass mail outs.  
44  
45

46  
47 We found that the generalisability of the included studies was hampered by flawed recruitment  
48  
49 study design and insufficient reporting of intervention content and delivery. Future research may  
50  
51 benefit from being conducted as a prospectively designed Study Within a Trial (SWAT), following the  
52  
53 recent guidance provided by Trial Forge[52]. Since there are many uncertainties in recruitment  
54  
55 methods, research should address one or more of the priority recruitment questions recently  
56  
57  
58  
59  
60



1  
2  
3 identified by the Prioritising Recruitment in Randomised Trials (PRioRiTy) study.[53] This will not only  
4  
5 improve the impact of individual studies but also deepen the body of recruitment evidence in  
6  
7 general.[8]  
8  
9

## 10 **ABBREVIATIONS**

11  
12 CINAHL: Cumulative Index to Nursing and Allied Health Literature  
13  
14

15  
16 ORRCA: Online Resource for Recruitment Research in Clinical Trials  
17  
18

19  
20 PPI: Patient and public involvement  
21  
22

23  
24 PRioRiTy study: Prioritising Recruitment in Randomised Trials study  
25  
26

27  
28 PRISMA: Preferred Reporting Items for Systematic Reviews and Meta-Analyses  
29  
30

31  
32 QuinteT: Qualitative Research Integrated within Trials  
33  
34

35  
36 RCT: randomised controlled trial  
37  
38

39  
40 SEAR framework: Screened, Eligible, Approached, Randomised framework  
41  
42

## 43 **DECLARATIONS**

### 44 **Funding**

45  
46 KB is supported by a postgraduate scholarship from the NHMRC Clinical Trials Centre, University of  
47  
48 Sydney.  
49  
50

### 51 **Competing interests**

52  
53 None to declare  
54  
55

### 56 **Author contributions**

1  
2  
3 The review was conceived by KB and GW. KB performed the database searches. KB and GW  
4 performed eligibility checking. KB extracted the data from included studies and KB and LA performed  
5 the quality assessments. KB wrote the first draft of the manuscript. All authors reviewed and refined  
6 the manuscript and approved the final manuscript.  
7  
8  
9

### 10 11 12 **Acknowledgements**

13  
14  
15 We thank Rod Dyson and Sherilyn Goldstone for their contributions to this work.  
16

### 17 18 **Data sharing**

19  
20 Data set available on request from the corresponding author ([karen.bracken@ctc.usyd.edu.au](mailto:karen.bracken@ctc.usyd.edu.au))  
21  
22

### 23 24 **Ethics approval and consent to participate**

25  
26 Not applicable  
27  
28  
29  
30  
31  
32  
33  
34  
35  
36  
37  
38  
39  
40  
41  
42  
43  
44  
45  
46  
47  
48  
49  
50  
51  
52  
53  
54  
55  
56  
57  
58  
59  
60

## REFERENCES

1. Walters SJ, Bonacho dos Anjos Henriques-Cadby I, Bortolami O, et al. Recruitment and retention of participants in randomised controlled trials: a review of trials funded and published by the United Kingdom Health Technology Assessment Programme. *BMJ Open* 2017;7:e015276. doi: 10.1136/bmjopen-2016-015276
2. Sully BGO, Julius SA, Nicholl J. A reinvestigation of recruitment to randomised, controlled, multicentre trials: a review of trials funded by two UK funding agencies. *Trials* 2013;14:166. doi: 10.1186/1745-6215-14-166
3. McDonald AM, Knight RC, Campbell MK, et al. What influences recruitment to randomised controlled trials? A review of trials funded by two UK funding agencies. *Trials* 2006;7:9. doi: 10.1186/1745-6215-7-9
4. Tudur Smith C, Hickey H, Clarke M, et al. The trials methodological research agenda: results from a priority setting exercise. *Trials* 2014;15:32. doi: 10.1186/1745-6215-15-32
5. Bower P, Brueton V, Gamble C, et al. Interventions to improve recruitment and retention in clinical trials: a survey and workshop to assess current practice and future priorities. *Trials* 2014;15:399. doi: 10.1186/1745-6215-15-399
6. Treweek S, Lockhart P, Pitkethly M, et al. Methods to improve recruitment to randomised controlled trials: Cochrane systematic review and meta-analysis. *BMJ Open* 2013;3:e002360. doi: 10.1136/bmjopen-2012-002360
7. Caldwell PH, Hamilton S, Tan A, et al. Strategies for increasing recruitment to randomised controlled trials: systematic review. *PLoS Med* 2010;7:e1000368.
8. Treweek S, Pitkethly M, Cook J, et al. Strategies to improve recruitment to randomised trials. *Cochrane Database Syst Rev* 2018:MR000013. doi: 10.1002/14651858.MR000013.pub6
9. Trivedi RB, Szarka JG, Beaver K, et al. Recruitment and retention rates in behavioral trials involving patients and a support person: a systematic review. *Contemp Clin Trials* 2013;36:307-18. doi: 10.1016/j.cct.2013.07.009
10. Amon KL, Campbell AJ, Hawke C, et al. Facebook as a recruitment tool for adolescent health research: a systematic review. *Acad Pediatr* 2014;14:439-47.e4. doi: 10.1016/j.acap.2014.05.049
11. Cooper C, Ketley D, Livingston G. Systematic review and meta-analysis to estimate potential recruitment to dementia intervention studies. *Int J Geriatr Psychiatry* 2014;29:515-25. doi: 10.1002/gps.4034
12. Provencher V, Mortenson WB, Tanguay-Garneau L, et al. Challenges and strategies pertaining to recruitment and retention of frail elderly in research studies: a systematic review. *Arch Gerontol Geriatr* 2014;59:18-24. doi: 10.1016/j.archger.2014.03.006
13. Boland J, Currow DC, Wilcock A, et al. A systematic review of strategies used to increase recruitment of people with cancer or organ failure into clinical trials: implications for palliative care research. *J Pain Symptom Manage* 2015;49:762-72.e5. doi: 10.1016/j.jpainsymman.2014.09.018
14. Lam E, Partridge SR, Allman-Farinelli M. Strategies for successful recruitment of young adults to healthy lifestyle programmes for the prevention of weight gain: a systematic review. *Obes Rev* 2016;17:178-200. doi: 10.1111/obr.12350
15. Galli L, Knight R, Robertson S, et al. Using marketing theory to inform strategies for recruitment: a recruitment optimisation model and the txt2stop experience. *Trials* 2014;15:182. doi: 10.1186/1745-6215-15-182
16. Food U, Administration D. Guideline for the study and evaluation of gender differences in the clinical evaluation of drugs; notice. *Fed Regist* 1993;58:39406.
17. Coakley M, Fadiran EO, Parrish LJ, et al. Dialogues on diversifying clinical trials: successful strategies for engaging women and minorities in clinical trials. *J Womens Health* 2012;21:713-16.

18. Australian Burden of Disease Study. Impact and causes of illness and death in Australia: Australian Institute of Health and Welfare; 2011 revised 2016 Available from: <https://www.aihw.gov.au/getmedia/d4df9251-c4b6-452f-a877-8370b6124219/196663.pdf.aspx?inline=true> accessed 23 March 2018.
19. The Health of Australian Males: Australian Institute of Health and Welfare; 2017 Available from: <https://www.aihw.gov.au/reports/men-women/male-health/contents/who-are> accessed 23 March 2018.
20. Milner A, Kavanagh A, King T, et al. The Influence of Masculine Norms and Occupational Factors on Mental Health: Evidence From the Baseline of the Australian Longitudinal Study on Male Health. *Am J Mens Health* 2018;1557988317752607. doi: 10.1177/1557988317752607
21. O'Dowd T. Men's Health Journal. *BMJ* 2001;323:1432. doi: 10.1136/bmj.323.7326.1432
22. Smith JA, Braunack-Mayer A, Wittert G. What do we know about men's help-seeking and health service use? *Med J Aust* 2006;184:81-3.
23. Yousaf O, Grunfeld EA, Hunter MS. A systematic review of the factors associated with delays in medical and psychological help-seeking among men. *Health Psychol Rev* 2015;9:264-76. doi: 10.1080/17437199.2013.840954
24. Whitaker C, Stevelink S, Fear N. The Use of Facebook in Recruiting Participants for Health Research Purposes: A Systematic Review. *J Med Internet Res* 2017;19:e290. doi: 10.2196/jmir.7071
25. Huesch MD, Mukherjee D, Saunders EFH. E-recruitment into a bipolar disorder trial using Facebook tailored advertising. *Clin Trials* 2018;1740774518784018. doi: 10.1177/1740774518784018
26. Christensen T, Riis AH, Hatch EE, et al. Costs and Efficiency of Online and Offline Recruitment Methods: A Web-Based Cohort Study. *J Med Internet Res* 2017;19:e58. doi: 10.2196/jmir.6716
27. Carter-Harris L, Bartlett Ellis R, Warrick A, et al. Beyond Traditional Newspaper Advertisement: Leveraging Facebook-Targeted Advertisement to Recruit Long-Term Smokers for Research. *J Med Internet Res* 2016;18:e117. doi: 10.2196/jmir.5502
28. Wilson C, Rooshenas L, Paramasivan S, et al. Development of a framework to improve the process of recruitment to randomised controlled trials (RCTs): the SEAR (Screened, Eligible, Approached, Randomised) framework. *Trials* 2018;19:50. doi: 10.1186/s13063-017-2413-6
29. Study Quality Assessment Tools: National Heart, Lung, and Blood Institute; Available from: <https://www.nhlbi.nih.gov/health-topics/study-quality-assessment-tools> accessed 28 November 2017.
30. Bhar SS, Wiltsey-Stirman S, Zembroski D, et al. Recruiting older men for geriatric suicide research. *Int Psychogeriatr* 2013;25:88-95.
31. Cauley JA, Fluharty L, Ellenberg SS, et al. Recruitment and Screening for the Testosterone Trials. *J Gerontol A Biol Sci Med Sci* 2015;70:1105-11. doi: 10.1093/gerona/glv031
32. Chlebowski RT, Menon R, Chaisanguanthum RM, et al. Prospective evaluation of two recruitment strategies for a randomized controlled cancer prevention trial. *Clin Trials* 2010;7:744-8. doi: 10.1177/1740774510383886
33. Cook ED, Arnold KB, Hermos JA, et al. Impact of supplemental site grants to increase African American accrual for the Selenium and Vitamin E Cancer Prevention Trial. *Clin Trials* 2010;7:90-99.
34. Heiney SP, Arp Adams S, Drake BF, et al. Successful subject recruitment for a prostate cancer behavioral intervention trial. *Clin Trials* 2010;7:411-7. doi: 10.1177/1740774510373491
35. Kumar N, Crocker T, Smith T, et al. Challenges and potential solutions to meeting accrual goals in a Phase II chemoprevention trial for prostate cancer. *Contemp Clin Trials* 2012;33:279-85. doi: 10.1016/j.cct.2011.11.004
36. Kusek JW, Ahrens A, Burrows PK, et al. Recruitment for a clinical trial of drug treatment for benign prostatic hyperplasia. *Urology* 2002;59:63-7.

- 1  
2  
3 37. Lee JY, Foster HE, Jr., McVary KT, et al. Recruitment of participants to a clinical trial of botanical  
4 therapy for benign prostatic hyperplasia. *J Altern Complement Med* 2011;17:469-72.
- 5 38. Moinpour CM, Atkinson JO, Thomas SM, et al. Minority recruitment in the prostate cancer  
6 prevention trial. *Ann Epidemiol* 2000;10:S85-91.
- 7 39. Donovan J, Mills N, Smith M, et al. Improving design and conduct of randomised trials by  
8 embedding them in qualitative research: ProtecT (prostate testing for cancer and treatment)  
9 study. *Br Med J* 2002;325:766-70.
- 10 40. Donovan JL, Peters TJ, Noble S, et al. Who can best recruit to randomized trials? Randomized trial  
11 comparing surgeons and nurses recruiting patients to a trial of treatments for localized  
12 prostate cancer (the ProtecT study). *J Clin Epidemiol* 2003;56:605-9.
- 13 41. Donovan JL, Lane JA, Peters TJ, et al. Development of a complex intervention improved  
14 randomization and informed consent in a randomized controlled trial. *J Clin Epidemiol*  
15 2009;62:29-36. doi: 10.1016/j.jclinepi.2008.02.010
- 16 42. Eccles BK, Cross W, Rosario DJ, et al. SABRE 1 (Surgery Against Brachytherapy—a Randomised  
17 Evaluation): feasibility randomised controlled trial (RCT) of brachytherapy vs radical  
18 prostatectomy in low–intermediate risk clinically localised prostate cancer. *BJU Int*  
19 2013;112:330-37.
- 20 43. Wallace K, Fleshner N, Jewett M, et al. Impact of a multi-disciplinary patient education session on  
21 accrual to a difficult clinical trial: the Toronto experience with the surgical prostatectomy  
22 versus interstitial radiation intervention trial. *J Clin Oncol* 2006;24:4158-62. doi:  
23 10.1200/JCO.2006.06.3875
- 24 44. Ford ME, Havstad SL, Davis SD. A randomized trial of recruitment methods for older African  
25 American men in the Prostate, Lung, Colorectal and Ovarian (PLCO) Cancer Screening Trial.  
26 *Clin Trials* 2004;1:343-51. doi: 10.1191/1740774504cn029oa
- 27 45. Lane JA, Wade J, Down L, et al. A Peer Review Intervention for Monitoring and Evaluating sites  
28 (PRIME) that improved randomized controlled trial conduct and performance. *J Clin*  
29 *Epidemiol* 2011;64:628-36. doi: 10.1016/j.jclinepi.2010.10.003
- 30 46. Huynh L, Johns B, Liu SH, et al. Cost-effectiveness of health research study participant  
31 recruitment strategies: a systematic review. *Clin Trials* 2014;11:576-83. doi:  
32 10.1177/1740774514540371
- 33 47. Silagy CA, Campion K, McNeil JJ, et al. Comparison of recruitment strategies for a large-scale  
34 clinical trial in the elderly. *J Clin Epidemiol* 1991;44:1105-14. doi: 10.1016/0895-  
35 4356(91)90013-Y
- 36 48. Tate DF, LaRose JG, Griffin LP, et al. Recruitment of young adults into a randomized controlled  
37 trial of weight gain prevention: message development, methods, and cost. *Trials*  
38 2014;15:326. doi: 10.1186/1745-6215-15-326
- 39 49. Gelinas L, Pierce R, Winkler S, et al. Using Social Media as a Research Recruitment Tool: Ethical  
40 Issues and Recommendations. *The American Journal of Bioethics* 2017;17:3-14. doi:  
41 10.1080/15265161.2016.1276644
- 42 50. Morgan AJ, Jorm AF, Mackinnon AJ. Internet-based recruitment to a depression prevention  
43 intervention: lessons from the Mood Memos study. *J Med Internet Res* 2013;15:e31. doi:  
44 10.2196/jmir.2262
- 45 51. Fergusson D, Monfaredi Z, Pussegoda K, et al. The prevalence of patient engagement in  
46 published trials: a systematic review. *Res Involv Engagem* 2018;4:17. doi: 10.1186/s40900-  
47 018-0099-x
- 48 52. Treweek S, Bevan S, Bower P, et al. Trial Forge Guidance 1: what is a Study Within A Trial  
49 (SWAT)? *Trials* 2018;19:139. doi: 10.1186/s13063-018-2535-5
- 50 53. Healy P, Galvin S, Williamson PR, et al. Identifying trial recruitment uncertainties using a James  
51 Lind Alliance Priority Setting Partnership – the PRioRiT (Prioritising Recruitment in  
52 Randomised Trials) study. *Trials* 2018;19:147. doi: 10.1186/s13063-018-2544-4
- 53  
54  
55  
56  
57  
58  
59  
60

Figure 1: Search and screening results

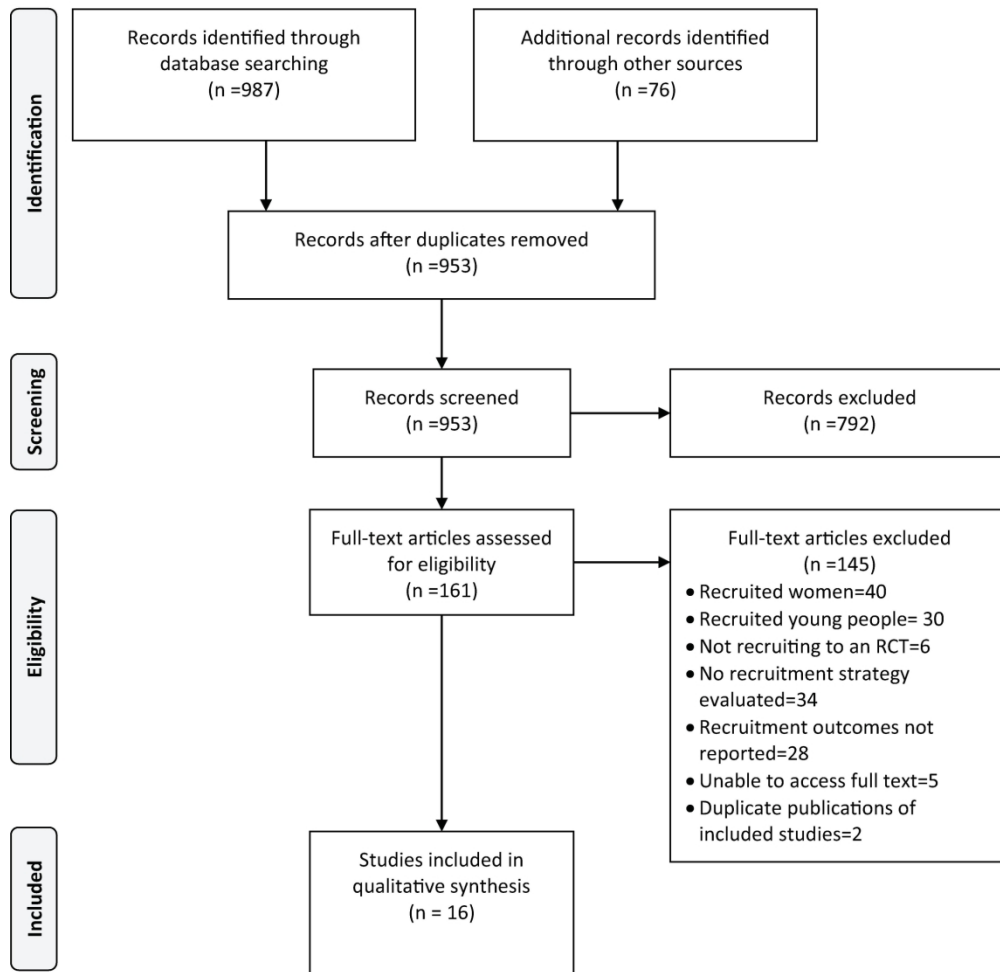

Figure 1: Search and screening results

192x205mm (300 x 300 DPI)

### Database search strategies

Searches undertaken 28-30 August 2017 and updated 1 December 2017

Database(s): Ovid MEDLINE(R) 1946 to November Week 4 2017

Search Strategy:

- 1 Patient Selection/ (62722)
- 2 (recruit\* or enrol\*).ti. (29374)
- 3 1 or 2 (89212)
- 4 (male or men or men's or mens or man).tw. (1328352)
- 5 3 and 4 (4910)
- 6 randomized controlled trial.pt. (505126)
- 7 controlled clinical trial.pt. (100403)
- 8 randomized.ab. (391531)
- 9 placebo.ab. (189148)
- 10 clinical trials as topic.sh. (197003)
- 11 randomly.ab. (266025)
- 12 trial.ti. (175432)
- 13 or/6-12 (1131407)
- 14 exp animals/ not humans.sh. (4742733)
- 15 13 not 14 (1035827)
- 16 5 and 15 (881)
- 17 limit 16 to (english language and yr="2000 - 2017") (717)

Database(s): Embase Classic 1947 to 1973, Embase 1974 to 2017 November 29

Search Strategy:

- 1 patient selection/ (82554)
- 2 (recruit\* or enrol\*).ti. (37067)
- 3 1 or 2 (118188)
- 4 male/ (7776297)
- 5 (male or men or men's or mens or man).tw. (2046754)
- 6 4 or 5 (8236464)
- 7 Randomized Controlled Trial/ (485342)
- 8 rct.tw. (26750)
- 9 7 or 8 (502579)
- 10 3 and 6 and 9 (2490)
- 11 limit 10 to (human and english language and exclude medline journals and yr="2000 -Current") (112)

Database: CINAHL

Search strategy:

- S1 ((MH "Research Subject Recruitment")) OR (TI recruit\*) OR (TI enrol\*)
- S2 ((MH "Male") OR (MH "Men")) OR (TI (men OR male\* OR man OR mens OR men's))
- S3 (MH "Clinical Trials+")
- S4 S1 and S2 and S3
- S5 S4 Limiters - English Language; Published Date: 20000101-20171231; Exclude MEDLINE records (108)

1  
2  
3 Database: ORRCA

4 Search strategy:

5  
6 Inclusion:

- 7 • Gender = Male only

8  
9 Exclusion:

- 10 • Aged <18 years
  - 11 • Published before 2000
  - 12 • Study outcome "Reason for participant refusal" only
- 13  
14  
15  
16  
17  
18  
19  
20  
21  
22  
23  
24  
25  
26  
27  
28  
29  
30  
31  
32  
33  
34  
35  
36  
37  
38  
39  
40  
41  
42  
43  
44  
45  
46  
47  
48  
49  
50  
51  
52  
53  
54  
55  
56  
57  
58  
59  
60



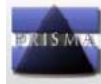

# PRISMA 2009 Checklist

| Section/topic                      | #  | Checklist item                                                                                                                                                                                                                                                                                              | Reported on page #   |
|------------------------------------|----|-------------------------------------------------------------------------------------------------------------------------------------------------------------------------------------------------------------------------------------------------------------------------------------------------------------|----------------------|
| <b>TITLE</b>                       |    |                                                                                                                                                                                                                                                                                                             |                      |
| Title                              | 1  | Identify the report as a systematic review, meta-analysis, or both.                                                                                                                                                                                                                                         | 1                    |
| <b>ABSTRACT</b>                    |    |                                                                                                                                                                                                                                                                                                             |                      |
| Structured summary                 | 2  | Provide a structured summary including, as applicable: background; objectives; data sources; study eligibility criteria, participants, and interventions; study appraisal and synthesis methods; results; limitations; conclusions and implications of key findings; systematic review registration number. | 2                    |
| <b>INTRODUCTION</b>                |    |                                                                                                                                                                                                                                                                                                             |                      |
| Rationale                          | 3  | Describe the rationale for the review in the context of what is already known.                                                                                                                                                                                                                              | 4-5                  |
| Objectives                         | 4  | Provide an explicit statement of questions being addressed with reference to participants, interventions, comparisons, outcomes, and study design (PICOS).                                                                                                                                                  | 5                    |
| <b>METHODS</b>                     |    |                                                                                                                                                                                                                                                                                                             |                      |
| Protocol and registration          | 5  | Indicate if a review protocol exists, if and where it can be accessed (e.g., Web address), and, if available, provide registration information including registration number.                                                                                                                               | 8                    |
| Eligibility criteria               | 6  | Specify study characteristics (e.g., PICOS, length of follow-up) and report characteristics (e.g., years considered, language, publication status) used as criteria for eligibility, giving rationale.                                                                                                      | 5-6                  |
| Information sources                | 7  | Describe all information sources (e.g., databases with dates of coverage, contact with study authors to identify additional studies) in the search and date last searched.                                                                                                                                  | 6                    |
| Search                             | 8  | Present full electronic search strategy for at least one database, including any limits used, such that it could be repeated.                                                                                                                                                                               | Supplementary file 1 |
| Study selection                    | 9  | State the process for selecting studies (i.e., screening, eligibility, included in systematic review, and, if applicable, included in the meta-analysis).                                                                                                                                                   | 6-7                  |
| Data collection process            | 10 | Describe method of data extraction from reports (e.g., piloted forms, independently, in duplicate) and any processes for obtaining and confirming data from investigators.                                                                                                                                  | 7                    |
| Data items                         | 11 | List and define all variables for which data were sought (e.g., PICOS, funding sources) and any assumptions and simplifications made.                                                                                                                                                                       | 7                    |
| Risk of bias in individual studies | 12 | Describe methods used for assessing risk of bias of individual studies (including specification of whether this was done at the study or outcome level), and how this information is to be used in any data synthesis.                                                                                      | 7-8                  |
| Summary measures                   | 13 | State the principal summary measures (e.g., risk ratio, difference in means).                                                                                                                                                                                                                               | 7                    |
| Synthesis of results               | 14 | Describe the methods of handling data and combining results of studies, if done, including measures of consistency (e.g., $I^2$ ) for each meta-analysis.                                                                                                                                                   | 8                    |

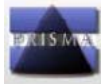

# PRISMA 2009 Checklist

| Section/topic                 | #  | Checklist item                                                                                                                                                                                           | Reported on page #               |
|-------------------------------|----|----------------------------------------------------------------------------------------------------------------------------------------------------------------------------------------------------------|----------------------------------|
| Risk of bias across studies   | 15 | Specify any assessment of risk of bias that may affect the cumulative evidence (e.g., publication bias, selective reporting within studies).                                                             | N/A                              |
| Additional analyses           | 16 | Describe methods of additional analyses (e.g., sensitivity or subgroup analyses, meta-regression), if done, indicating which were pre-specified.                                                         | N/A                              |
| <b>RESULTS</b>                |    |                                                                                                                                                                                                          |                                  |
| Study selection               | 17 | Give numbers of studies screened, assessed for eligibility, and included in the review, with reasons for exclusions at each stage, ideally with a flow diagram.                                          | 8-9 + Figure 1                   |
| Study characteristics         | 18 | For each study, present characteristics for which data were extracted (e.g., study size, PICOS, follow-up period) and provide the citations.                                                             | Table 1                          |
| Risk of bias within studies   | 19 | Present data on risk of bias of each study and, if available, any outcome level assessment (see item 12).                                                                                                | Table 1 and supplementary file 3 |
| Results of individual studies | 20 | For all outcomes considered (benefits or harms), present, for each study: (a) simple summary data for each intervention group (b) effect estimates and confidence intervals, ideally with a forest plot. | A) Tables 3-6<br>B) N/A          |
| Synthesis of results          | 21 | Present results of each meta-analysis done, including confidence intervals and measures of consistency.                                                                                                  | N/A                              |
| Risk of bias across studies   | 22 | Present results of any assessment of risk of bias across studies (see Item 15).                                                                                                                          | N/A                              |
| Additional analysis           | 23 | Give results of additional analyses, if done (e.g., sensitivity or subgroup analyses, meta-regression [see Item 16]).                                                                                    | N/A                              |
| <b>DISCUSSION</b>             |    |                                                                                                                                                                                                          |                                  |
| Summary of evidence           | 24 | Summarize the main findings including the strength of evidence for each main outcome; consider their relevance to key groups (e.g., healthcare providers, users, and policy makers).                     | 29-31                            |
| Limitations                   | 25 | Discuss limitations at study and outcome level (e.g., risk of bias), and at review-level (e.g., incomplete retrieval of identified research, reporting bias).                                            | 31                               |
| Conclusions                   | 26 | Provide a general interpretation of the results in the context of other evidence, and implications for future research.                                                                                  | 29-31                            |
| <b>FUNDING</b>                |    |                                                                                                                                                                                                          |                                  |
| Funding                       | 27 | Describe sources of funding for the systematic review and other support (e.g., supply of data); role of funders for the systematic review.                                                               | 33                               |

From: Moher D, Liberati A, Tetzlaff J, Altman DG, The PRISMA Group (2009). Preferred Reporting Items for Systematic Reviews and Meta-Analyses: The PRISMA Statement. PLoS Med 6(7): e1000097. doi:10.1371/journal.pmed1000097

For more information, visit: [www.prisma-statement.org](http://www.prisma-statement.org).

For peer review only - <http://bmjopen.bmj.com/site/about/guidelines.xhtml>

Quality assessment checklists by study design^

Controlled trials

| Study ID      | Described as RCT | Adequate randomisation | Allocation concealment | Double-blind group assignment | Blind outcome assessment | Groups balanced on characteristics | Drop out <=20% | Differential drop out <=15% | High protocol adherence | Other interventions avoided | Outcomes: valid, reliable and consistent | Sufficient sample size | Outcomes and sub-groups pre-specified | Intention to treat | Quality rating* |
|---------------|------------------|------------------------|------------------------|-------------------------------|--------------------------|------------------------------------|----------------|-----------------------------|-------------------------|-----------------------------|------------------------------------------|------------------------|---------------------------------------|--------------------|-----------------|
| Cook, 2010    | N                | NA                     | NA                     | N                             | ?                        | Y                                  | Y              | Y                           | ?                       | ?                           | Y                                        | ?                      | ?                                     | Y                  | POOR            |
| Donovan, 2003 | Y                | Y                      | Y                      | N                             | ?                        | ?                                  | Y              | Y                           | Y                       | Y                           | Y                                        | Y                      | Y                                     | Y                  | GOOD            |
| Eccles, 2013  | Y                | Y                      | Y                      | N                             | N                        | ?                                  | Y              | Y                           | Y                       | Y                           | Y                                        | N                      | Y                                     | Y                  | FAIR            |
| Ford, 2004    | Y                | ?                      | ?                      | N                             | N                        | ?                                  | N              | ?                           | ?                       | Y                           | Y                                        | Y                      | Y                                     | N                  | FAIR            |

^ Quality assessment checklists adapted from Study Quality Assessment Tools: National Heart, Lung, and Blood Institute [Available from: [https://www.nhlbi.nih.gov/health-topics/study-quality-assessment-tools.](https://www.nhlbi.nih.gov/health-topics/study-quality-assessment-tools)]

\* Quality rated as good, fair or poor with respect to the recruitment-related outcomes of interest in this systematic review

Y: Yes

N: No

NA: Not applicable

?: Not reported/unable to determine

## Descriptive studies

| Study ID         | Clear objective | Study pop'n clear | Participation >=50% | Participants: same time period and pop'n. Criteria: pre-specified and uniform | Sample size: justification, power. Effect: estimate and variance | Exposure: measure prior to outcome measure | Sufficient time: exposure to outcome | Level of exposure measured | Exposure: clear, valid, reliable and consistent | Exposure: assessment more than once | Outcome: clear, valid, reliable and consistent | Outcome: blinded assessment | Loss to follow-up <=20% | Confounders: measured and adjusted for | Quality rating* |
|------------------|-----------------|-------------------|---------------------|-------------------------------------------------------------------------------|------------------------------------------------------------------|--------------------------------------------|--------------------------------------|----------------------------|-------------------------------------------------|-------------------------------------|------------------------------------------------|-----------------------------|-------------------------|----------------------------------------|-----------------|
| Bhar, 2013       | Y               | Y                 | Y                   | N                                                                             | N                                                                | Y                                          | Y                                    | NA                         | Y                                               | NA                                  | Y                                              | N                           | N                       | N                                      | FAIR            |
| Cauley, 2015     | Y               | Y                 | ?                   | N                                                                             | N                                                                | N                                          | Y                                    | N                          | ?                                               | NA                                  | N                                              | N                           | Y                       | N                                      | POOR            |
| Chlebovski, 2010 | Y               | Y                 | Y                   | ?                                                                             | N                                                                | Y                                          | Y                                    | N                          | Y                                               | NA                                  | Y                                              | N                           | ?                       | N                                      | FAIR            |
| Heiney, 2010     | Y               | Y                 | Y                   | ?                                                                             | N                                                                | Y                                          | Y                                    | NA                         | Y                                               | NA                                  | Y                                              | N                           | N                       | N                                      | FAIR            |
| Kumar, 2012      | y               | y                 | ?                   | ?                                                                             | N                                                                | ?                                          | Y                                    | NA                         | N                                               | NA                                  | N                                              | N                           | Y                       | N                                      | POOR            |
| Kusek, 2002      | Y               | Y                 | ?                   | ?                                                                             | N                                                                | Y                                          | Y                                    | N                          | Y                                               | NA                                  | Y                                              | N                           | ?                       | N                                      | FAIR            |
| Lee, 2011        | Y               | Y                 | ?                   | N                                                                             | N                                                                | Y                                          | Y                                    | N                          | Y                                               | NA                                  | Y                                              | N                           | N                       | N                                      | FAIR            |

\* Quality rated as good, fair or poor with respect to the recruitment-related outcomes of interest in this systematic review

Y: Yes

N: No

NA: Not applicable

?: Not reported/unable to determine

1  
2  
3  
4  
5  
6  
7  
8  
9  
10  
11  
12  
13  
14  
15  
16  
17  
18  
19  
20  
21  
22  
23  
24  
25  
26  
27  
28  
29  
30  
31  
32  
33  
34  
35  
36  
37  
38  
39  
40  
41  
42  
43  
44  
45  
46  
47

Before and after studies

| Study ID       | Clear objective | Selection criteria: clear and pre-specified | Participants representative | All eligible participants enrolled | Sufficient sample size | Intervention: clear and consistently | Outcomes: clear, pre-specified, valid, reliable and consistently assessed | Blind outcome assessment | Loss to followup <20%. Loss to followup accounted for | Stats methods used. P values reported     | Multiple measures of outcome | Group level statistical analysis | Quality rating* |
|----------------|-----------------|---------------------------------------------|-----------------------------|------------------------------------|------------------------|--------------------------------------|---------------------------------------------------------------------------|--------------------------|-------------------------------------------------------|-------------------------------------------|------------------------------|----------------------------------|-----------------|
| Donovan, 2002  | Y               | Y                                           | Y                           | Y                                  | ?                      | Y                                    | Y                                                                         | N                        | Y                                                     | N                                         | Y                            | N                                | FAIR            |
| Donovan, 2009  | Y               | Y                                           | Y                           | Y                                  | ?                      | Y                                    | Y                                                                         | N                        | Y                                                     | All sites: N<br>Under-performing sites: Y | Y                            | N                                | FAIR            |
| Lane, 2011     | Y               | Y                                           | Y                           | Y                                  | ?                      | Y                                    | N                                                                         | N                        | Y                                                     | Y                                         | NA                           | N                                | POOR            |
| Moinpour, 2000 | Y               | Y                                           | Y                           | ?                                  | ?                      | N                                    | Y                                                                         | N                        | ?                                                     | N                                         | NA                           | N                                | POOR            |
| Wallace, 2006  | Y               | Y                                           | Y                           | Y                                  | ?                      | Y                                    | Y                                                                         | N                        | Y                                                     | N                                         | NA                           | N                                | FAIR            |

\* Quality rated as good, fair or poor with respect to the recruitment-related outcomes of interest in this systematic review  
 Y: Yes  
 N: No  
 NA: Not applicable  
 ?: Not reported/unable to determine

# BMJ Open

## Recruitment Strategies in Randomised Controlled Trials of Men Aged 50 Years and Older: A Systematic Review

|                                 |                                                                                                                                                                                                                                                        |
|---------------------------------|--------------------------------------------------------------------------------------------------------------------------------------------------------------------------------------------------------------------------------------------------------|
| Journal:                        | <i>BMJ Open</i>                                                                                                                                                                                                                                        |
| Manuscript ID                   | bmjopen-2018-025580.R1                                                                                                                                                                                                                                 |
| Article Type:                   | Research                                                                                                                                                                                                                                               |
| Date Submitted by the Author:   | 17-Dec-2018                                                                                                                                                                                                                                            |
| Complete List of Authors:       | Bracken, Karen; NHMRC Clinical Trials Centre, Askie, Lisa; NHMRC Clinical Trials Centre<br>Keech, Anthony; NHMRC Clinical Trials Centre<br>Hague, Wendy; NHMRC Clinical Trials Centre<br>Wittert, Gary; University of Adelaide, Department of Medicine |
| <b>Primary Subject Heading</b>: | Research methods                                                                                                                                                                                                                                       |
| Secondary Subject Heading:      | Communication                                                                                                                                                                                                                                          |
| Keywords:                       | Participant recruitment, Systematic review, Randomized Controlled Trials, Men's Health, Patient selection                                                                                                                                              |
|                                 |                                                                                                                                                                                                                                                        |

SCHOLARONE™  
Manuscripts

# Recruitment Strategies in Randomised Controlled Trials of Men Aged 50 Years and Older: A Systematic Review

Karen Bracken, NHMRC Clinical Trials Centre, University of Sydney, 92-94 Parramatta Road,  
Camperdown NSW 2050, [karen.bracken@ctc.usyd.edu.au](mailto:karen.bracken@ctc.usyd.edu.au) (corresponding author)

Lisa Askie, NHMRC Clinical Trials Centre, University of Sydney, 92-94 Parramatta Road, Camperdown  
NSW 2050, [lisa.askie@ctc.usyd.edu.au](mailto:lisa.askie@ctc.usyd.edu.au)

Anthony Keech, NHMRC Clinical Trials Centre, University of Sydney, 92-94 Parramatta Road,  
Camperdown NSW 2050, [tony@ctc.usyd.edu.au](mailto:tony@ctc.usyd.edu.au)

Wendy Hague, NHMRC Clinical Trials Centre, University of Sydney, 92-94 Parramatta Road,  
Camperdown NSW 2050, [wendy@ctc.usyd.edu.au](mailto:wendy@ctc.usyd.edu.au)

Gary Wittert, University of Adelaide, Adelaide, SA 5005, [gary.wittert@adelaide.edu.au](mailto:gary.wittert@adelaide.edu.au)

Word count: 4,502

## ABSTRACT

**Objectives:** To identify and review evaluations of strategies to recruit men aged 50 years and over to randomised controlled trials (RCTs).

**Design:** Systematic review and narrative synthesis

**Data sources:** MEDLINE, EMBASE, CINAHL and ORRCA databases were searched to 1 December 2017

**Eligibility criteria:** Studies using quantitative methods to evaluate recruitment strategies to RCTs of men aged 50 years and older.

**Data extraction and synthesis:** A single reviewer extracted data (for each strategy, number of participants approached, screened and randomised, and cost). Study quality was assessed using National Heart, Lung and Blood Institute Quality Assessment Tools and considered study design, description of interventions, description and measurement of outcomes, completeness of outcome reporting, performance of statistical testing and consideration of confounders. Recruitment strategies were categorised by the recruitment stage they addressed.

**Results:** Sixteen studies (N>14,000) were included: one good quality, ten fair quality and five poor quality. Studies evaluated strategies to identify prospective participants, and to improve the processes for assessing participant eligibility, providing participant information and seeking consent. In good and fair quality studies, the most effective strategies for identifying participants were referral from an affiliated health service provider (2 studies), mass mailing (5 studies), and media coverage (2 studies). Community outreach activities such as displaying posters and attending local community events were not effective (2 studies). Trial-specific training of site recruitment staff, developed using qualitative analysis of recruitment visits (2 studies), and provision of study information to prospective participants at a multi-disciplinary, group information session (1 study) both improved recruitment.



1  
2  
3 **Conclusion:** Improved engagement of men aged 50 years and older in RCTs is needed. A gender-  
4 sensitized approach to RCT recruitment may help to address this need. We have identified several  
5 promising recruitment strategies that merit further evaluation.  
6  
7  
8

9  
10  
11 **Systematic review registration:** PROSPERO CRD42017060301  
12

## 13 **ARTICLE SUMMARY**

### 14 **Strengths and limitations of this study**

- 15  
16  
17  
18  
19  
20  
21  
22  
23  
24  
25  
26  
27  
28  
29  
30  
31  
32  
33  
34  
35  
36  
37  
38  
39  
40  
41  
42  
43  
44  
45  
46  
47  
48  
49  
50  
51  
52  
53  
54  
55  
56  
57  
58  
59  
60
- This review incorporated systematic database search strategies and quality assessment tools to identify and appraise eligible studies.
  - The categorisation of included studies according to the stage of the recruitment pathway they addressed is a practical approach designed to aid interpretation of the review results by trial managers.
  - Many of the included studies were at risk of significant or some bias, limiting the reliability of the results presented in these papers.
  - Few studies reported the cost of recruitment strategies.

## INTRODUCTION

RCTs (randomised controlled trials) are the accepted gold standard in health intervention research. Recruitment to RCTs can be challenging, and around 50% of RCTs fail to achieve their recruitment targets.[1-3] The potential consequences of failed RCT recruitment are considerable and include wasted research resources, delays in the release of RCT results and increased likelihood of Type 2 error. RCTs expose trial participants to potential risk and inconvenience, and trials that fail to recruit fully may waste the goodwill and commitment of the participants that they do recruit. Clinical trial unit directors have identified the evaluation of strategies to boost recruitment as the highest priority in trial methodology research.[4]

Despite the importance of successful recruitment to the overall success of trials and the calls for research in this area, the published evidence on how best to conduct RCT recruitment is limited.[5] Several large systematic reviews have found surprisingly few randomised evaluations of recruitment strategies with many randomised recruitment studies being underpowered, low quality, or set within hypothetical rather than real-world RCTs.[6-8] Other recent recruitment-focused systematic reviews have concentrated on specific demographic groups or disease areas.[9-14] This approach recognises the diversity of trial populations, interventions, and designs to build a greater understanding of how recruitment strategies may influence specific participant groups.[15]

It is well-established that the differences in disease incidence and health outcomes observed in men and women are determined not only by biological sex differences but also by socially constructed gender roles and norms. There is an increasing focus on gender-sensitive health service delivery to address health inequities for both men and women.[16,17] Women have been historically underrepresented in clinical trials, and so gendered approaches to trial recruitment have often focused on the recruitment of women. [18,19] However, research is also needed to better engage men in clinical trials. Men have a lower life expectancy than women, and men, especially those aged over 50 years, bear a greater disease burden.[20,21] In the past, men have been characterised as disengaged with healthcare services but it is now recognised that men will engage willingly and

1  
2  
3 effectively with healthcare that recognises, and is tailored to, men's preferences.[22,23] An  
4  
5 exploration of gender-sensitized strategies to recruit men to RCTs may, therefore, be  
6  
7 worthwhile,[24] particularly since men may be underrepresented in RCTs of disease prevention[25]  
8  
9 and health promotion.[26,27]  
10

11  
12 Evaluations of online and social media recruitment strategies are becoming more common with  
13  
14 promising results reported in the recruitment of adolescents and young people[10,28] and  
15  
16 women.[29,30] Facebook and other types of online promotion may achieve a broader reach and be  
17  
18 more cost-effective than traditional recruitment methods such as newspaper advertising, media  
19  
20 coverage and posters.[30,31] However, a recent systematic review of recruitment using Facebook  
21  
22 found little evidence of its effectiveness in recruiting participants aged over 35 years.[28] It is  
23  
24 therefore unclear whether online and social media strategies are effective in recruiting men aged  
25  
26 over 50 to RCTs.  
27  
28

29  
30 This review aims to identify and review evaluations of strategies to recruit men aged over 50 years  
31  
32 to RCTs in order to guide recruitment planning for future men's health RCTs.  
33  
34

## 35 **METHODS**

### 36 **Eligibility criteria**

37  
38 Studies met our inclusion criteria if they evaluated a strategy or strategies intended to improve the  
39  
40 recruitment of men aged 50 years or older to an RCT. Studies must have reported at least one of the  
41  
42 defined, quantitative, recruitment outcome measures. Studies were eligible irrespective of whether  
43  
44 they recruited patients or healthy volunteers.  
45  
46

47  
48 An initial scoping of the literature revealed that recruitment studies set within RCTs of both men and  
49  
50 women often failed to provide adequate detail to determine the effectiveness of recruitment  
51  
52 strategies on male participants alone. Therefore, to assess the impact of recruitment strategies on  
53  
54 men, studies were only eligible for inclusion if set within an RCT recruiting men only.  
55  
56  
57  
58  
59  
60

1  
2  
3 The review included RCTs recruiting participants aged 50 years and older. Where the age range was  
4 not specified, studies were included where the mean/median age was 60 years or older, or where  
5 the disease of interest was prevalent in older men (e.g. prostate cancer).  
6  
7

8  
9 Included studies needed to evaluate a specific recruitment strategy or strategies; papers describing  
10 barriers and facilitators to recruitment or discussing informed consent but not presenting a specific  
11 strategy or approach to recruitment were excluded. Similarly, papers providing a brief account of  
12 recruitment without describing or evaluating specific strategies or approaches were excluded.  
13  
14

15  
16 The search strategy was restricted to papers published since 2000. Communication channels and  
17 data management practices are central to recruitment research. Both of these areas have been  
18 transformed in the past 18 years by the growth of internet access. Evaluations published before  
19 2000 are therefore less likely to be relevant to current trial practices, particularly those reporting  
20 advertising and media-related strategies.  
21  
22

### 23 24 25 26 27 28 29 30 31 32 **Search strategy**

33  
34 A search of four databases (Medline, Embase, CINAHL and ORRCA) was performed in July 2017 and  
35 updated in December 2017. Studies published in English from 2000 onwards were considered for  
36 inclusion. Individualised search strategies (available in supplementary file 1) were developed for  
37 each database using a combination of keywords relating to recruitment, enrolment, men and RCTs.  
38  
39 In addition, the reference lists of all included articles and other recruitment-related systematic  
40 reviews were searched by hand to identify other potentially relevant papers.  
41  
42

### 43 44 45 46 47 48 49 **Study selection and data extraction**

50  
51 Citations and abstracts were exported to Endnote® Version X8.2 and duplicates were removed. A  
52 10% random sample of citations was selected for independent screening for eligibility by two  
53 reviewers (KB and GW), with disagreement resolved by discussion. The Kappa statistic for double-  
54  
55  
56  
57  
58  
59  
60

1  
2  
3 screened citations indicated substantial agreement ( $\text{Kappa}=0.66$ ) and the remaining 90% of articles  
4  
5 were screened by KB alone.  
6  
7

8 Data from the included studies were extracted by KB using a pre-piloted data extraction form.  
9

10 Studies were categorised according to disease area of the host RCT, type of host RCT (treatment,  
11 prevention or screening), number of participants in the recruitment study and recruitment study  
12 design. Where reported, the number of prospective participants who received the recruitment  
13 intervention and the number of those participants who went on to be screened and randomised to  
14 the host RCT were extracted. The costs incurred were also extracted.  
15  
16  
17  
18  
19  
20  
21  
22

### 23 **Categorisation of studies**

24  
25 The Qualitative Research Integrated within Trials (QuinteT) group's SEAR (Screened, Eligible,  
26 Approached, Randomised) framework was developed to map each stage of the recruitment  
27 pathway.[32] We adapted this framework to categorise the included studies according to the stage  
28 or stages of the recruitment process they addressed: identification of participants ('Screened' in the  
29 SEAR framework), assessment of eligibility ('Eligible' in the SEAR framework), and patient  
30 information and consent ('Approached' in the SEAR framework).  
31  
32  
33  
34  
35  
36  
37  
38  
39

### 40 **Outcome measures**

41  
42 Our primary outcomes were: strategy uptake (defined as the percentage of people receiving the  
43 recruitment intervention who went on to be randomised to the host RCT), strategy contribution  
44 (defined as the percentage of all participants randomised to the host RCT who were randomised as a  
45 result of a particular strategy) and strategy cost (defined as direct or indirect cost per participant  
46 randomised).  
47  
48  
49  
50  
51  
52  
53  
54

### 55 **Assessment of study quality**

56  
57  
58  
59  
60

1  
2  
3 Six tools to assess study quality or risk of bias were identified from recent systematic reviews of  
4 recruitment strategies and were piloted for suitability and useability. After piloting, the National  
5 Heart, Lung and Blood Institute Quality Assessment Tools[33] were selected as they addressed all  
6 included quantitative study designs, assessed key quality components and could be easily adapted  
7 for the assessment of non-clinical data. The tools listed criteria for judging study quality including  
8 study design, description of recruitment interventions, description and measurement of recruitment  
9 outcomes, completeness of outcome reporting, the performance of statistical testing and  
10 consideration of confounders. Based on these criteria, studies were subjectively judged by KB, in  
11 consultation with LA, as being of good (least risk of bias), fair (susceptible to bias) or poor (significant  
12 risk of bias) quality. Since this review addresses a methodological rather than a clinical question, the  
13 fair quality category was broadly defined to include studies that provided useful evaluation data  
14 even where some flaws were noted in the quality assessment. Quality assessments were performed  
15 with respect to the quantitative, recruitment-related outcomes of interest in this review only. The  
16 qualitative components of included mixed methods papers were not assessed as they were outside  
17 the scope of this review.

### 37 **Methods of analysis**

38  
39  
40 All studies, irrespective of quality, were included in the descriptive analysis in order to describe the  
41 full range of strategies evaluated and to assist with hypothesis generation for future research.  
42  
43 Outcome measures were only analysed for studies of fair or good quality. Estimates from poor  
44 studies were excluded except where no estimates were available from studies of good or fair quality.  
45  
46 In this case, the estimate is presented with a caveat that the study is of poor quality. We had  
47  
48 planned to perform a meta-analysis if studies were sufficiently homogeneous in the target  
49  
50 population and delivery of the intervention to do so.  
51  
52  
53  
54  
55  
56  
57  
58  
59  
60

1  
2  
3 The Preferred Reporting Items for Systematic Reviews and Meta-Analyses (PRISMA) checklist was  
4 completed and can be found in supplementary file 2. This review was registered on the international  
5 prospective register of systematic reviews, PROSPERO (registration number: CRD42017060301).  
6  
7  
8  
9

### 10 **Patient and public involvement**

11 Patients were not involved in the design or conduct of this systematic review. It is not possible to  
12 disseminate the results of this review to the participants of the included studies.  
13  
14  
15  
16  
17

## 18 **RESULTS**

### 19 **Study selection**

20  
21  
22  
23  
24 Nine hundred and fifty-three unique papers were extracted. Of these, 16 recruitment studies were  
25 eligible for inclusion (Figure 1). These 16 recruitment studies (listed in Table 1) were conducted in  
26 the context of 12 RCTs since two RCTs hosted more than one recruitment study.  
27  
28  
29  
30  
31  
32  
33  
34  
35  
36  
37  
38  
39  
40  
41  
42  
43  
44  
45  
46  
47  
48  
49  
50  
51  
52  
53  
54  
55  
56  
57  
58  
59  
60

Table 1: Key characteristics, summary of findings and quality assessment of included studies

| Author, year         | Host RCT acronym | Host RCT therapeutic area  | Recruitment stage studied      | Recruitment study design | # screened/ eligible/ randomised <sup>1</sup> | Intervention/s                                                                        | Summary of findings                                                                                                                                                                                                                                                                           | Quality assessment <sup>2</sup> |
|----------------------|------------------|----------------------------|--------------------------------|--------------------------|-----------------------------------------------|---------------------------------------------------------------------------------------|-----------------------------------------------------------------------------------------------------------------------------------------------------------------------------------------------------------------------------------------------------------------------------------------------|---------------------------------|
| Bhar, 2013[34]       | Not specified    | Suicide prevention         | Identification of participants | Quantitative descriptive | 233/48/33                                     | Various mass mailing and health service referral strategies                           | Seeking referrals from a co-investigator's clinic was the most effective strategy and also had the highest uptake rate. Seeking referrals from non-collaborating health services and mass mailings were not effective strategies.                                                             | Fair                            |
| Cauley, 2015[35]     | T trials         | Low testosterone treatment | Identification of participants | Quantitative descriptive | 51,085/931/790                                | Various mass mailing, media and community outreach strategies                         | Mass mailing was the most effective recruitment strategy and was also the lowest cost per man screened. TV, radio and print advertisements, clinicaltrials.gov listing, posters and flyers and presentations at events resulted in very few men being screened.                               | Poor                            |
| Chlebowski, 2010[36] | SELECT           | Prostate cancer prevention | Identification of participants | Quantitative descriptive | 4022/NR/634                                   | Mailing to male homeowners vs mailing to previous female research participant spouses | Mailing previous female research participants' spouses resulted in higher recruitment uptake than mailing men and was also more cost-effective. Mailing women contributed fewer participants than mailing men due to the relatively small size of the past research participant mailing list. | Fair                            |



1  
2  
3  
4  
5  
6  
7  
8  
9  
10  
11  
12  
13  
14  
15  
16  
17  
18  
19  
20  
21  
22  
23  
24  
25  
26  
27  
28  
29  
30  
31  
32  
33  
34  
35  
36  
37  
38  
39  
40  
41  
42  
43  
44  
45  
46

|                  |               |                                        |                                |                                 |              |                                                                                                                  |                                                                                                                                                                                                                |      |
|------------------|---------------|----------------------------------------|--------------------------------|---------------------------------|--------------|------------------------------------------------------------------------------------------------------------------|----------------------------------------------------------------------------------------------------------------------------------------------------------------------------------------------------------------|------|
| Cook, 2010[37]   | SELECT        | Prostate cancer prevention             | Identification of participants | Non-randomised controlled trial | NR/NR/8532   | Various site-directed minority-targeted recruitment strategies funded by minority recruitment enhancement grants | Sites awarded grants increased recruitment of African American men significantly more than matched comparison sites. Overall recruitment was also increased at grant sites.                                    | Poor |
| Heiney, 2010[38] | EASE          | Prostate cancer treatment              | Identification of participants | Quantitative descriptive        | 440/178/59   | Various mass mailing, media, health service referral and community outreach strategies                           | Mass mailing and health service referral strategies were moderately effective. Recruitment uptake was highest in participants identified through health service referral.                                      | Fair |
| Kumar, 2012[39]  | Not specified | Prostate cancer prevention             | Identification of participants | Quantitative descriptive        | 3547/167/74  | Various media, health service referral and community outreach strategies                                         | Principal investigator referral was the only effective recruitment strategy. Television, newspaper, print and web-based communications and distribution of posters and flyers resulted in very few screenings. | Poor |
| Kusek, 2002[40]  | MTOPS         | Benign prostatic hyperplasia treatment | Identification of participants | Quantitative descriptive        | 4170/NR/2931 | Various mass mailing, media, health service referral and community outreach strategies                           | Newspaper advertising and stories, and mass mailings were the most effective recruitment strategies.                                                                                                           | Fair |

|    |           |               |             |                 |              |                           |                         |                                   |      |
|----|-----------|---------------|-------------|-----------------|--------------|---------------------------|-------------------------|-----------------------------------|------|
| 1  |           |               |             |                 |              |                           |                         |                                   |      |
| 2  |           |               |             |                 |              |                           |                         |                                   |      |
| 3  | Lee,      | CAMUS         | Benign      | Identification  | Quantitative | 1032/NR/369               | Various mass mailing,   | Newspaper, radio and online       | Fair |
| 4  | 2011[41]  |               | prostatic   | of participants | descriptive  |                           | media, health service   | advertising, and mass mailing     |      |
| 5  |           |               | hyperplasia |                 |              |                           | referral and            | were the most effective           |      |
| 6  |           |               | treatment   |                 |              |                           | community outreach      | recruitment strategies. Emailing  |      |
| 7  |           |               |             |                 |              |                           | strategies              | was less effective than           |      |
| 8  |           |               |             |                 |              |                           |                         | traditional mailing.              |      |
| 9  |           |               |             |                 |              |                           |                         |                                   |      |
| 10 |           |               |             |                 |              |                           |                         |                                   |      |
| 11 | Moinpour, | PCPT          | Prostate    | Identification  | Before and   | NR/NR/18,822 <sup>3</sup> | Site-directed minority- | Minority-targeted recruitment     | Poor |
| 12 | 2000[42]  |               | cancer      | of participants | after        |                           | targeted recruitment    | strategies were not effective at  |      |
| 13 |           |               | prevention  |                 |              |                           | strategies conducted    | four of the five sites awarded    |      |
| 14 |           |               |             |                 |              |                           | by funded minority      | funds for a minority recruiter.   |      |
| 15 |           |               |             |                 |              |                           | recruiter site staff    |                                   |      |
| 16 |           |               |             |                 |              |                           |                         |                                   |      |
| 17 |           |               |             |                 |              |                           |                         |                                   |      |
| 18 | Donovan,  | PROTECT       | Prostate    | Participant     | Before and   | NR/155/108                | Site training and       | Recruitment rates increased       | Fair |
| 19 | 2002[43]  | (feasibility) | cancer      | information     | after        |                           | guidance documents      | after introduction of the         |      |
| 20 |           |               | treatment   | and consent     |              |                           | to address              | recruitment-focused site          |      |
| 21 |           |               |             |                 |              |                           | recruitment issues      | training and guidance.            |      |
| 22 |           |               |             |                 |              |                           | identified through      |                                   |      |
| 23 |           |               |             |                 |              |                           | qualitative research    |                                   |      |
| 24 |           |               |             |                 |              |                           |                         |                                   |      |
| 25 |           |               |             |                 |              |                           |                         |                                   |      |
| 26 | Donovan,  | PROTECT       | Prostate    | Participant     | RCT          | NR/ 167/103               | Recruitment visit       | Recruitment rates in the          | Good |
| 27 | 2003[44]  | (feasibility) | cancer      | information     |              |                           | conducted by nurse vs   | urologist and the nurse groups    |      |
| 28 |           |               | treatment   | and consent     |              |                           | recruitment visit       | were not significantly different. |      |
| 29 |           |               |             |                 |              |                           | conducted by urologist  | Recruitment by nurse was more     |      |
| 30 |           |               |             |                 |              |                           |                         | cost-effective than recruitment   |      |
| 31 |           |               |             |                 |              |                           |                         | by urologist.                     |      |
| 32 |           |               |             |                 |              |                           |                         |                                   |      |
| 33 |           |               |             |                 |              |                           |                         |                                   |      |
| 34 |           |               |             |                 |              |                           |                         |                                   |      |
| 35 |           |               |             |                 |              |                           |                         |                                   |      |
| 36 |           |               |             |                 |              |                           |                         |                                   |      |
| 37 |           |               |             |                 |              |                           |                         |                                   |      |
| 38 |           |               |             |                 |              |                           |                         |                                   |      |
| 39 |           |               |             |                 |              |                           |                         |                                   |      |
| 40 |           |               |             |                 |              |                           |                         |                                   |      |
| 41 |           |               |             |                 |              |                           |                         |                                   |      |
| 42 |           |               |             |                 |              |                           |                         |                                   |      |
| 43 | 12        |               |             |                 |              |                           |                         |                                   |      |
| 44 |           |               |             |                 |              |                           |                         |                                   |      |
| 45 |           |               |             |                 |              |                           |                         |                                   |      |
| 46 |           |               |             |                 |              |                           |                         |                                   |      |

1  
2  
3  
4  
5  
6  
7  
8  
9  
10  
11  
12  
13  
14  
15  
16  
17  
18  
19  
20  
21  
22  
23  
24  
25  
26  
27  
28  
29  
30  
31  
32  
33  
34  
35  
36  
37  
38  
39  
40  
41  
42  
43  
44  
45  
46

|                   |                       |                                                |                                                                                               |                  |                           |                                                                                                                                  |                                                                                                                                                                                                                                                                              |      |
|-------------------|-----------------------|------------------------------------------------|-----------------------------------------------------------------------------------------------|------------------|---------------------------|----------------------------------------------------------------------------------------------------------------------------------|------------------------------------------------------------------------------------------------------------------------------------------------------------------------------------------------------------------------------------------------------------------------------|------|
| Donovan, 2009[45] | PROTECT               | Prostate cancer treatment                      | Participant information and consent                                                           | Before and after | NR/2664/1643 <sup>3</sup> | Site training and guidance documents to address recruitment issues identified through qualitative research                       | Recruitment rates fell slightly after introduction of the recruitment-focused site training and guidance.                                                                                                                                                                    | Fair |
| Eccles, 2013[46]  | SABRE 1 (feasibility) | Prostate cancer treatment                      | Participant information and consent                                                           | RCT              | 286/30/4                  | 30-minute decision aid video providing trial information vs control (standard information)                                       | Too few participants were recruited to assess effectiveness of the decision aid video. Some indication that the video may have decreased the recruitment rate when compared to control.                                                                                      | Fair |
| Wallace, 2006[47] | SPIRIT                | Prostate cancer treatment                      | Participant information and consent                                                           | Before and after | NR/290/32                 | Multi-disciplinary group information session prior to recruitment vs one-on-one recruitment visit                                | Recruitment rates increased after introduction of the multi-disciplinary group information sessions.                                                                                                                                                                         | Fair |
| Ford, 2004[48]    | PLCO/AAMEN project    | Prostate, lung and colorectal cancer screening | Identification of participants, assessment of eligibility and patient information and consent | RCT              | 17,770/12,400/376         | Three recruitment approaches of increasing intensity targeted at African American men, compared to standard recruitment approach | The most intensive approach to screening, which included face-to-face screening in a church setting, resulted in a higher recruitment rate than control. The improvement was statistically significant but small. Other less intense approaches were no better than control. | Fair |

|    |          |         |           |                 |            |                           |                     |                                |      |
|----|----------|---------|-----------|-----------------|------------|---------------------------|---------------------|--------------------------------|------|
| 1  |          |         |           |                 |            |                           |                     |                                |      |
| 2  |          |         |           |                 |            |                           |                     |                                |      |
| 3  | Lane,    | PROTECT | Prostate  | Assessment of   | Before and | NR/2664/1643 <sup>3</sup> | Peer-conducted site | Recruitment issues were        | Poor |
| 4  | 2011[49] |         | cancer    | eligibility and | after      |                           | monitoring visits   | identified at two out of eight |      |
| 5  |          |         | treatment | participant     |            |                           |                     | monitored sites. Specific      |      |
| 6  |          |         |           | information     |            |                           |                     | recruitment metrics (consent   |      |
| 7  |          |         |           | and consent     |            |                           |                     | form return rate, reduction in |      |
| 8  |          |         |           |                 |            |                           |                     | health-related exclusions)     |      |
| 9  |          |         |           |                 |            |                           |                     | improved at these two sites    |      |
| 10 |          |         |           |                 |            |                           |                     | following monitoring. The      |      |
| 11 |          |         |           |                 |            |                           |                     | impact of the monitoring       |      |
| 12 |          |         |           |                 |            |                           |                     | intervention on overall        |      |
| 13 |          |         |           |                 |            |                           |                     | recruitment was not reported.  |      |
| 14 |          |         |           |                 |            |                           |                     |                                |      |
| 15 |          |         |           |                 |            |                           |                     |                                |      |
| 16 |          |         |           |                 |            |                           |                     |                                |      |

17 NR = not reported

18 <sup>1</sup> Refers to number of participants screened (including pre-screening), eligible (approached for consent) and randomised to the host RCT as part of the  
19 recruitment study

20 <sup>2</sup> Quality rated as good, fair or poor with respect to the quantitative recruitment-related outcomes of interest in this systematic review

21 <sup>3</sup> Study did not report number of participants included in the recruitment evaluation. Instead total numbers of participants in host RCT are reported

### Study characteristics

The characteristics of included studies are described in Table 2. As one might expect in trials recruiting exclusively older men, most selected studies reported recruitment to prostate cancer trials (11 studies plus one additional study in various cancers including prostate), with other studies reporting recruitment to trials in benign prostatic hyperplasia, low testosterone and suicide prevention. Three studies focused on the recruitment of men from minority ethnic groups. Recruitment studies ranged in size from 155 to 51,085 screened participants and most commonly used a quantitative descriptive design.

Table 2: Summary characteristics of included studies

| Description                                   | No of studies |
|-----------------------------------------------|---------------|
| Therapeutic area of host RCT                  |               |
| Cancer - prostate                             | 11            |
| Benign prostatic hyperplasia                  | 2             |
| Testosterone                                  | 1             |
| Suicide                                       | 1             |
| Cancer – various                              | 1             |
| Host RCT type                                 |               |
| Treatment                                     | 10            |
| Prevention                                    | 5             |
| Screening                                     | 1             |
| Recruitment study design                      |               |
| Quantitative descriptive                      | 10            |
| Randomised controlled trial                   | 3             |
| Before and after study                        | 2             |
| Non-randomised controlled study               | 1             |
| No of study participants in recruitment study |               |
| 0–999                                         | 6             |
| 1000–4999                                     | 5             |
| 5000–9999                                     | 2             |
| 10,000+                                       | 3             |
| <b>TOTAL recruitment studies included</b>     | <b>16</b>     |

### Quality assessment

Most (10 of 16) studies were assessed as being of fair quality in relation to the recruitment outcomes of interest in this review. One study was evaluated as good, and five were evaluated as poor (Tables 3-5). In general, all studies addressed a clear study question and enrolled a

1  
2  
3 representative sample of participants. Recruitment outcomes were reliably measured and clearly  
4 reported, although few studies reported recruitment cost. However, the description and  
5 measurement of intervention delivery were often incomplete or missing. Some studies reported that  
6 interventions were delivered inconsistently across study sites, but this inconsistency was not  
7 accounted for in the reporting of outcomes. This limitation made comparisons within and between  
8 studies problematic. Possible confounding was also a common issue. Of the 16 recruitment studies,  
9 only three had a randomised design, and one additional, non-randomised study reported baseline  
10 demographic data by intervention group. In the remaining 12 studies, differences between the  
11 intervention groups in baseline characteristics could not be assessed. Therefore, differences in  
12 recruitment between groups may have been influenced by the characteristics of the individuals  
13 studied rather than the interventions evaluated. Furthermore, in some studies, several recruitment  
14 activities were implemented concurrently, but no study discussed the possible impact of this on the  
15 observed recruitment outcomes. Another common limitation was the lack of prospective study  
16 design. Three studies reported a prospective design; six reported a retrospective design and the  
17 remaining seven did not specify.

18  
19 One study, which was otherwise of good quality, was assessed as fair due to inadequate sample  
20 size.[46] Several studies incorporated both quantitative and qualitative designs, but were assessed  
21 for quality based on only quantitative analysis and outcomes.[43,45,49]

Table 3: Summary of quality assessments – controlled trials ^

| Study ID      | Described as RCT | Adequate randomisation | Allocation concealment | Double-blind group assignment | Blind outcome assessment | Groups balanced on characteristics | Drop out <=20% | Differential drop out <=15% | High protocol adherence | Other interventions avoided | Outcomes: valid, reliable and consistent | Sufficient sample size | Outcomes and sub-groups pre-specified | Intention to treat | Quality rating - quantitative outcomes* |
|---------------|------------------|------------------------|------------------------|-------------------------------|--------------------------|------------------------------------|----------------|-----------------------------|-------------------------|-----------------------------|------------------------------------------|------------------------|---------------------------------------|--------------------|-----------------------------------------|
| Cook, 2010    | N                | NA                     | NA                     | N                             | ?                        | Y                                  | Y              | Y                           | ?                       | ?                           | Y                                        | ?                      | ?                                     | Y                  | POOR                                    |
| Donovan, 2003 | Y                | Y                      | Y                      | N                             | ?                        | ?                                  | Y              | Y                           | Y                       | Y                           | Y                                        | Y                      | Y                                     | Y                  | GOOD                                    |
| Eccles, 2013  | Y                | Y                      | Y                      | N                             | N                        | ?                                  | Y              | Y                           | Y                       | Y                           | Y                                        | N                      | Y                                     | Y                  | FAIR                                    |
| Ford, 2004    | Y                | ?                      | ?                      | N                             | N                        | ?                                  | N              | ?                           | ?                       | Y                           | Y                                        | Y                      | Y                                     | N                  | FAIR                                    |

^ Quality assessment checklists adapted from Study Quality Assessment Tools: National Heart, Lung, and Blood Institute. [Available from: <https://www.nhlbi.nih.gov/health-topics/study-quality-assessment-tools>]

\* Quality rated as good, fair or poor with respect to the quantitative recruitment-related outcomes of interest in this systematic review

Y: Yes

N: No

NA: Not applicable

?: Not reported/unable to determine

Table 4: Summary of quality assessments – descriptive studies ^

| Study ID         | Clear objective | Study pop'n clear | Participation >=50% | Participants: same time period and pop'n. Criteria: pre-specified and uniform | Sample size: justification, power. Effect: estimate and variance | Exposure: measure prior to outcome measure | Sufficient time: exposure to outcome | Level of exposure measured | Exposure: clear, valid, reliable and consistent | Exposure: assessment more than once | Outcome: clear, valide, reliable and consistent | Outcome: blinded assessment | Loss to follow-up <=20% | Confounders: measured and adjusted for | Quality rating - quantitative outcomes* |
|------------------|-----------------|-------------------|---------------------|-------------------------------------------------------------------------------|------------------------------------------------------------------|--------------------------------------------|--------------------------------------|----------------------------|-------------------------------------------------|-------------------------------------|-------------------------------------------------|-----------------------------|-------------------------|----------------------------------------|-----------------------------------------|
| Bhar, 2013       | Y               | Y                 | Y                   | N                                                                             | N                                                                | Y                                          | Y                                    | NA                         | Y                                               | NA                                  | Y                                               | N                           | N                       | N                                      | FAIR                                    |
| Cauley, 2015     | Y               | Y                 | ?                   | N                                                                             | N                                                                | N                                          | Y                                    | N                          | ?                                               | NA                                  | N                                               | N                           | Y                       | N                                      | POOR                                    |
| Chlebovski, 2010 | Y               | Y                 | Y                   | ?                                                                             | N                                                                | Y                                          | Y                                    | N                          | Y                                               | NA                                  | Y                                               | N                           | ?                       | N                                      | FAIR                                    |
| Heiney, 2010     | Y               | Y                 | Y                   | ?                                                                             | N                                                                | Y                                          | Y                                    | NA                         | Y                                               | NA                                  | Y                                               | N                           | N                       | N                                      | FAIR                                    |
| Kumar, 2012      | Y               | Y                 | ?                   | ?                                                                             | N                                                                | ?                                          | Y                                    | NA                         | N                                               | NA                                  | N                                               | N                           | Y                       | N                                      | POOR                                    |
| Kusek, 2002      | Y               | Y                 | ?                   | ?                                                                             | N                                                                | Y                                          | Y                                    | N                          | Y                                               | NA                                  | Y                                               | N                           | ?                       | N                                      | FAIR                                    |



1  
2  
3  
4  
5  
6  
7  
8  
9  
10  
11  
12  
13  
14  
15  
16  
17  
18  
19  
20  
21  
22  
23  
24  
25  
26  
27  
28  
29  
30  
31  
32  
33  
34  
35  
36  
37  
38  
39  
40  
41  
42  
43  
44  
45  
46

|              |   |   |   |   |   |   |   |   |   |    |   |   |   |   |      |
|--------------|---|---|---|---|---|---|---|---|---|----|---|---|---|---|------|
| Lee,<br>2011 | Y | Y | ? | N | N | Y | Y | N | Y | NA | Y | N | N | N | FAIR |
|--------------|---|---|---|---|---|---|---|---|---|----|---|---|---|---|------|

---

^ Quality assessment checklists adapted from Study Quality Assessment Tools: National Heart, Lung, and Blood Institute. [Available from: <https://www.nhlbi.nih.gov/health-topics/study-quality-assessment-tools>]

\* Quality rated as good, fair or poor with respect to the quantitative recruitment-related outcomes of interest in this systematic review

Y: Yes  
 N: No  
 NA: Not applicable  
 ?: Not reported/unable to determine

For peer review only

Table 5: Summary of quality assessments – before and after studies ^

| Study ID       | Clear objective | Selection criteria: clear and pre-specified | Participants representative | All eligible participants enrolled | Sufficient sample size | Intervention: clear and consistently assessed | Outcomes: clear, pre-specified, valid, reliable and consistently assessed | Blind outcome assessment | Loss to followup <20%. Loss to followup accounted for | Stats methods used. P values reported     | Multiple measures of outcome | Group level statistical analysis | Quality rating - quantitative outcomes* |
|----------------|-----------------|---------------------------------------------|-----------------------------|------------------------------------|------------------------|-----------------------------------------------|---------------------------------------------------------------------------|--------------------------|-------------------------------------------------------|-------------------------------------------|------------------------------|----------------------------------|-----------------------------------------|
| Donovan, 2002  | Y               | Y                                           | Y                           | Y                                  | ?                      | Y                                             | Y                                                                         | N                        | Y                                                     | N                                         | Y                            | N                                | FAIR                                    |
| Donovan, 2009  | Y               | Y                                           | Y                           | Y                                  | ?                      | Y                                             | Y                                                                         | N                        | Y                                                     | All sites: N<br>Under-performing sites: Y | Y                            | N                                | FAIR                                    |
| Lane, 2011     | Y               | Y                                           | Y                           | Y                                  | ?                      | Y                                             | N                                                                         | N                        | Y                                                     | Y                                         | NA                           | N                                | POOR                                    |
| Moinpour, 2000 | Y               | Y                                           | Y                           | ?                                  | ?                      | N                                             | Y                                                                         | N                        | ?                                                     | N                                         | NA                           | N                                | POOR                                    |
| Wallace, 2006  | Y               | Y                                           | Y                           | Y                                  | ?                      | Y                                             | Y                                                                         | N                        | Y                                                     | N                                         | NA                           | N                                | FAIR                                    |

1  
2  
3  
4  
5  
6  
7  
8  
9  
10  
11  
12  
13  
14  
15  
16  
17  
18  
19  
20  
21  
22  
23  
24  
25  
26  
27  
28  
29  
30  
31  
32  
33  
34  
35  
36  
37  
38  
39  
40  
41  
42  
43  
44  
45  
46

^ Quality assessment checklists adapted from Study Quality Assessment Tools: National Heart, Lung, and Blood Institute. [Available from: <https://www.nhlbi.nih.gov/health-topics/study-quality-assessment-tools>]

\* Quality rated as good, fair or poor with respect to the quantitative recruitment-related outcomes of interest in this systematic review

Y: Yes

N: No

NA: Not applicable

?: Not reported/unable to determine

For peer review only

## Stages of recruitment and associated outcomes

The included studies addressed three recruitment stages: (i) identification of prospective participants, (ii) assessment of eligibility, and (iii) provision of participant information combined with seeking of consent. The strategies addressing each stage of recruitment are summarised below along with their reported recruitment outcomes. Outcomes are shown in Table 6 (studies that reported strategy uptake), Table 7 (studies that reported strategy contribution) and Table 8 (studies that reported strategy cost).

Table 6: Strategy uptake in included studies<sup>1</sup>

| Author, year                                      | Intervention/s                                                                                             | # Received recruitment intervention | # Randomised to host RCT (%) | Statistical testing | Statistically significant? |
|---------------------------------------------------|------------------------------------------------------------------------------------------------------------|-------------------------------------|------------------------------|---------------------|----------------------------|
| Recruitment stage: Identification of participants |                                                                                                            |                                     |                              |                     |                            |
| Bhar, 2013[34]                                    | Referrals from co-investigator's Veteran's Affairs mental health clinic                                    | 63                                  | 24 (38%)                     |                     |                            |
|                                                   | Referrals from psychiatric outpatient clinic                                                               | 18                                  | 3 (17%)                      |                     |                            |
|                                                   | Mass mailing to primary care patients mailing list                                                         | 869                                 | 6 (1%)                       |                     |                            |
|                                                   | Referrals from inpatient psychiatric unit                                                                  | 5                                   | 0 (0%)                       |                     |                            |
|                                                   | Referrals from primary care physicians                                                                     | 0                                   | 0 (N/A)                      | NR                  | NR                         |
| Chlebowski, 2010[36]                              | Mass mailing to male homeowners                                                                            | 60,000                              | 600 (1%)                     |                     |                            |
|                                                   | Mass mailing to spouses of previous female research participant                                            | 800                                 | 34 (4%)                      | NR                  | NR                         |
| Heiney, 2010[38]                                  | Referral by physician                                                                                      | 24                                  | 13 (54%)                     |                     |                            |
|                                                   | Referral from previous health research study                                                               | 206                                 | 11 (5%)                      |                     |                            |
|                                                   | Mass mailing to oncology clinic list                                                                       | 1,384                               | 15 (1%)                      |                     |                            |
|                                                   | Mass mailing to urology clinic list                                                                        | 759                                 | 8 (1%)                       |                     |                            |
|                                                   | Mass mailing to support services department list                                                           | 350                                 | 2 (1%)                       |                     |                            |
|                                                   | Posters, newspaper articles, other                                                                         | NR                                  | 10 (N/A)                     | NR                  | NR                         |
| Lee, 2011[41]                                     | Mass mailing by post to former trial participants, health system users and commercial direct mailing lists | 34,064                              | 143 (0.4%)                   |                     |                            |
|                                                   | Newspaper, radio and online advertising                                                                    | NR                                  | 129 (N/A)                    |                     |                            |
|                                                   | Mass mailing by email to university employees, physicians, database of people interested in research       | 35,000                              | 31 (0.1%)                    |                     |                            |
|                                                   | Referral from urology clinic                                                                               | 63                                  | 30 (48%)                     |                     |                            |
|                                                   | Posters and flyers                                                                                         | NR                                  | 8 (N/A)                      |                     |                            |
|                                                   | Other                                                                                                      | NR                                  | 28 (N/A)                     | NR                  | NR                         |
|                                                   | Recruitment stage: Participant information and consent                                                     |                                     |                              |                     |                            |
| Donovan, 2002[43]                                 | Before: Not specified                                                                                      | 30                                  | NR ("30-40%")                |                     |                            |

|                                                                                                                                     |                                                                                                                                                         |                              |                                          |                                         |     |
|-------------------------------------------------------------------------------------------------------------------------------------|---------------------------------------------------------------------------------------------------------------------------------------------------------|------------------------------|------------------------------------------|-----------------------------------------|-----|
|                                                                                                                                     | After: Recruitment training and documentation informed by qualitative research                                                                          | 155                          | 108 (70%)                                | NR                                      | NR  |
| Donovan, 2003[44]                                                                                                                   | Recruitment visit conducted by urologist                                                                                                                | 75                           | 53 (71%)                                 |                                         |     |
|                                                                                                                                     | Recruitment visit conducted by nurse                                                                                                                    | 75                           | 50 (67%)                                 | RD=4% (95% CI -10.8%, +18.8%<br>p=0.60) | No  |
| Donovan, 2009[45]                                                                                                                   | Before: Standard recruitment training and documentation                                                                                                 | NR                           | NR (69%)                                 |                                         |     |
|                                                                                                                                     | After: Recruitment training and documentation informed by qualitative research                                                                          | NR                           | NR (65%)                                 | NR                                      | NR  |
|                                                                                                                                     | Before: No site review                                                                                                                                  | Centre A: 24<br>Centre B: 46 | Centre A: 11 (45%)<br>Centre B: 23 (50%) |                                         |     |
|                                                                                                                                     | After: Recruitment-focused site review triggered by low performance                                                                                     | Centre A: 14<br>Centre B: 40 | Centre A: 12 (86%)<br>Centre B: 31 (78%) | Centre A: p=0.020<br>Centre B: p=0.013  | Yes |
| Eccles, 2013[46]                                                                                                                    | Standard study information at recruitment visit                                                                                                         | 15                           | 3 (20%)                                  |                                         |     |
|                                                                                                                                     | Decision aid video at recruitment visit                                                                                                                 | 15                           | 1 (7%)                                   | NR                                      | NR  |
| Wallace, 2006[47]                                                                                                                   | Before: one-on-one information session                                                                                                                  | 27                           | 0 (0%)                                   |                                         |     |
|                                                                                                                                     | After: Multi-disciplinary group information session                                                                                                     | 263                          | 32 (12%)                                 | NR                                      | NR  |
| Recruitment stage: Multiple stages (Identification of participants, assessment of eligibility, participant information and consent) |                                                                                                                                                         |                              |                                          |                                         |     |
| Ford, 2004[48]                                                                                                                      | Arm A: Enhanced mailed invitation, telephone screening by African American interviewer, collection of baseline data by mail                             | 3079                         | 78 (3%)                                  | Arm A v Arm D:<br>p<0.01                | Yes |
|                                                                                                                                     | Arm B: Enhanced mailed invitation, telephone screening by African American interviewer, collection of baseline data by phone                            | 3075                         | 87 (3%)                                  |                                         |     |
|                                                                                                                                     | Arm C: Enhanced mailed invitation, telephone screening by African American interviewer, collection of baseline data in person at church project session | 2949                         | 116 (4%)                                 |                                         |     |
|                                                                                                                                     | Arm D (control): Standard mailed invitation, telephone screening by African American or Caucasian interviewer,                                          | 3297                         | 95 (3%)                                  | Difference between arms B,              | No  |

1  
2  
3  
4  
5  
6  
7  
8  
9  
10  
11  
12  
13  
14  
15  
16  
17  
18  
19  
20  
21  
22  
23  
24  
25  
26  
27  
28  
29  
30  
31  
32  
33  
34  
35  
36  
37  
38  
39  
40  
41  
42  
43  
44  
45  
46

collection of baseline data by mail

C and D: p=0.66

---

<sup>1</sup> Strategy uptake defined as the percentage of people receiving the recruitment intervention who went on to be randomised to the host RCT. Studies that did not report the number of participants receiving the recruitment intervention excluded. Poor quality studies excluded.

NR = not reported

For peer review only

Table 7: Contribution of participant identification strategies to recruitment <sup>1</sup>

| Author, year         | Type of intervention    | Details                                                                              | # screened | # randomised (% of screened) | Contribution % <sup>2</sup> |
|----------------------|-------------------------|--------------------------------------------------------------------------------------|------------|------------------------------|-----------------------------|
| Bhar, 2013[34]       | Health service referral | Co-investigator's Veteran's Affairs mental health clinic                             | 45         | 24 (53%)                     | 73%                         |
|                      | Mass mailing            | Primary care patients mailing list                                                   | 174        | 6 (3%)                       | 18%                         |
|                      | Health service referral | Psychiatric outpatient clinic                                                        | 12         | 3 (25%)                      | 9%                          |
|                      | Health service referral | Inpatient psychiatric unit                                                           | 2          | 0 (0%)                       | 0%                          |
|                      | Health service referral | Primary care physicians                                                              | 0          | 0 (0%)                       | 0%                          |
| Chlebowski, 2010[36] | Mass mailing            | Male homeowners                                                                      | 3961       | 600 (15%)                    | 95%                         |
|                      | Mass mailing            | Spouses of previous female research participant                                      | 61         | 34 (56%)                     | 5%                          |
| Heiney, 2010[38]     | Mass mailing            | Oncology clinic list                                                                 | 78         | 15 (19%)                     | 25%                         |
|                      | Health service referral | Physician                                                                            | 24         | 13 (54%)                     | 22%                         |
|                      | Health service referral | Previous health research study                                                       | 161        | 11 (7%)                      | 19%                         |
|                      | Other                   | Posters, newspaper articles, other                                                   | 33         | 10 (30%)                     | 17%                         |
|                      | Mass mailing            | Urology clinic list                                                                  | 52         | 8 (15%)                      | 14%                         |
|                      | Mass mailing            | Support services department list                                                     | 12         | 2 (17%)                      | 3%                          |
| Kusek, 2002[40]      | Media                   | Newspaper advertising and new stories                                                | 1,140      | 876 (77%)                    | 30%                         |
|                      | Mass mailing            | Department of Motor Vehicles, screening lists and patient databases                  | 1,022      | 783 (77%)                    | 27%                         |
|                      | Health service referral | Urology clinic                                                                       | 361        | 280 (78%)                    | 10%                         |
|                      | Media                   | Radio advertising                                                                    | 326        | 257 (79%)                    | 9%                          |
|                      | Media                   | Inclusion in newsletters to military retirees and participating medical institutions | 325        | 245 (75%)                    | 8%                          |



1  
2  
3  
4  
5  
6  
7  
8  
9  
10  
11  
12  
13  
14  
15  
16  
17  
18  
19  
20  
21  
22  
23  
24  
25  
26  
27  
28  
29  
30  
31  
32  
33  
34  
35  
36  
37  
38  
39  
40  
41  
42  
43  
44  
45  
46

|               |                         |                                                                                                         |     |           |     |
|---------------|-------------------------|---------------------------------------------------------------------------------------------------------|-----|-----------|-----|
|               | Media                   | Television news stories and public service announcements                                                | 223 | 192 (86%) | 7%  |
|               | Other                   | Word of mouth                                                                                           | 150 | 122 (81%) | 4%  |
|               | Community outreach      | Poster/display                                                                                          | 132 | 94 (71%)  | 3%  |
|               | Other                   | Not specified/unknown                                                                                   | 461 | 57 (12%)  | 2%  |
|               | Community outreach      | Prostate health screening event                                                                         | 30  | 25 (83%)  | 1%  |
| Lee, 2011[41] | Mass mailing            | Postal invite - former trial participants, health system users and commercial direct mailing lists      | 608 | 143 (24%) | 39% |
|               | Media                   | Newspaper, radio and online advertising                                                                 | 273 | 129 (47%) | 35% |
|               | Mass mailing            | Email invite - university employees, physicians, database of people who registered interest in research | 87  | 31 (36%)  | 8%  |
|               | Health service referral | Urology clinic (chart review)                                                                           | 52  | 30 (58%)  | 8%  |
|               | Other                   | Not specified                                                                                           | NR  | 28 (NR)   | 8%  |
|               | Community outreach      | Posters and flyers                                                                                      | 12  | 8 (67%)   | 2%  |

<sup>1</sup> Poor quality studies excluded

<sup>2</sup> Contribution defined as the percentage of all participants randomised to the host RCT who were randomised as a result of a particular recruitment strategy

Table 8: Cost of recruitment strategies <sup>1</sup>

| Author, year         | Costs reported                                                                             | Recruitment phase                   | Intervention/s                                                                      | # randomised | Cost        | Cost per participant |
|----------------------|--------------------------------------------------------------------------------------------|-------------------------------------|-------------------------------------------------------------------------------------|--------------|-------------|----------------------|
| Bhar, 2013[34]       | Direct cost (stationary, postage, phone calls and catering) and indirect cost (staff time) | Identification of participants      | Mass mailing - primary care patients mailing list                                   | 6            | US\$3,813   | US\$636              |
|                      |                                                                                            |                                     | Health services referral - co-investigator's Veteran's Affairs mental health clinic | 24           | US\$1,066   | US\$44               |
|                      |                                                                                            |                                     | Health services referral - psychiatric outpatient clinic                            | 3            | US\$497     | US\$166              |
|                      |                                                                                            |                                     | Health services referral - primary care physicians                                  | 0            | US\$643     | N/A                  |
|                      |                                                                                            |                                     | Health services referral - inpatient psychiatric unit                               | 0            | US\$519     | N/A                  |
| Chlebowski, 2010[36] | Mailing cost (not further specified)                                                       | Identification of participants      | Mass mailing - male homeowners                                                      | 600          | US\$155,596 | US\$259              |
|                      |                                                                                            |                                     | Mass mailing - spouses of previous female participant                               | 34           | US\$2,000   | US\$59               |
| Donovan, 2003[44]    | Salary and on-costs for staff time                                                         | Participant information and consent | Recruitment visit performed by urologist                                            | 53           | NR          | £43.29               |
|                      |                                                                                            |                                     | Recruitment visit performed by nurse                                                | 50           | NR          | £36.40               |

<sup>1</sup> Poor quality studies excluded

### Identification of prospective participants

Participant identification strategies were evaluated in nine studies.[34-42] Excluding poor quality studies, all studies reported the contribution of participant identification strategies to enrolment (shown in Table 7) while only four studies reported strategy uptake (shown in Table 6) and two studies reported strategy cost (Table 8). Within the participant identification category, we further grouped strategies as mass mailings, media coverage and advertising, health service referrals, or community outreach activities. This categorisation was adapted from previous recruitment research.[50,51] The data from Table 7 have been summarised in Table 9 to aid comparison between studies. The most frequently evaluated strategy were mass mailings and community outreach strategies (seven studies). Media strategies were evaluated in six studies and health service referrals in five studies.

Table 9: A summary of the contribution of participant identifications strategies to RCT recruitment <sup>1,2</sup>

|                      | Mass mailing | Media coverage & advertising | Health service referrals | Community outreach | Other, unspecified, unknown | Total # participants enrolled |
|----------------------|--------------|------------------------------|--------------------------|--------------------|-----------------------------|-------------------------------|
| Kusek, 2002[40]      | 783 (27%)    | 1570 (54%)                   | 280 (10%)                | 119 (4%)           | 179 (6%)                    | 2,931(100%)                   |
| Chlebowski, 2010[36] | 634 (100%)   | --                           | --                       | --                 | --                          | 634 (100%)                    |
| Lee, 2011[41]        | 174 (47%)    | 129 (35%)                    | 30 (8%)                  | 8 (2%)             | 28 (8%)                     | 369 (100%)                    |
| Heiney, 2010[38]     | 25 (42%)     | NR                           | 24 (41%)                 | NR                 | --                          | 59 (100%)                     |
| Bhar, 2013[34]       | 6 (18%)      | --                           | 27 (82%)                 | --                 | --                          | 33 (100%)                     |

<sup>1</sup> Contribution defined as the number of participants randomised as a result of each strategy (percentage of all participants randomised)

<sup>2</sup> Poor quality studies excluded

NR = not reported separately. In total, media and community strategies accounted for 17% of enrolled participants in this study.

## Mass mailing

Recruitment by mass mailing involved sending study information and a letter of invitation to the members of one or more acquired mailing lists. Seven studies sent postal invitations[34-38,40,41] and one study also sent email invitations.[41] Mailing lists were obtained from a variety of sources including the Department of Veterans Affairs database, Department of Motor Vehicles database, homeowner database, participant lists from previous health research, patient databases, commercial mailing lists, volunteer databases and lists of physicians and university employees.

Excluding poor studies, mailing referrals contributed 18-100% of enrolled participants in the studies that used mailings.[34,36,38,40,41] Uptake was very low across all studies (0.09%-1.0% of mail recipients went on to be randomised to the host RCT).[34,36,38,41] The direct cost of mailings ranged from \$59 to \$259 per participant enrolled.[34,36] In one study, postal invitations had a higher uptake than email invitations (0.4% of mail recipients enrolled vs 0.1% of email recipients).[41] However, mail and email lists were drawn from dissimilar populations making a direct, unadjusted comparison problematic.

In one study,[36] mailing women who were past research participants and asking them to invite their spouses resulted in higher recruitment uptake (4.3% vs 1.0% enrolled) and lower cost per participant (\$59 per enrolment vs \$259 per enrolment) compared to mailing men on a homeowners database. However, the homeowners mailing list was much larger than the past-participant mailing list (60,000 vs 800 members), and so 95% of participants were recruited through the homeowners mailing list despite the lower uptake rate.[36]

## Media coverage and advertising

Six studies[35,37-41] described a variety of media strategies including news stories on television[40] and in newspapers;[38] advertising on television,[35,39,40] radio[35,40,41] and in

1  
2  
3 newspapers;[35,39-41] listing the study on the clinicaltrials.gov website;[35,39] other online  
4  
5 advertising;[41] and inclusion in military retiree and medical institution newsletters.[40]  
6  
7

8 Two studies reported that media strategies were effective, accounting for 35%[41] and 54%[40] of  
9  
10 enrolments. The remaining four studies were excluded for poor quality or lack of media-related  
11  
12 outcome reporting. One study[40] reported that newspapers were the largest source of recruited  
13  
14 participants (30%) followed by radio (9%), newsletters (8%) and television (7%). Although five  
15  
16 studies mentioned using paid advertising only one poor quality study[35] reported costs with  
17  
18 television being the cheapest (\$46 per screening), followed by radio advertising (\$51 per screening)  
19  
20 and print most expensive (\$105 per screening). All were more expensive than mass mailing (\$38 per  
21  
22 screening).  
23  
24  
25

#### 26 27 Health service referral

28  
29  
30 Health service referral was defined as identification of prospective participants by a health service  
31  
32 provider. Only strategies which involved the health service provider having performed some initial  
33  
34 screening were included. Where mass mail outs were performed using clinic lists without prior  
35  
36 clinical screening, these were categorised as a mass mailing. Five studies[34,38-41] sought referrals  
37  
38 from a variety of sources including outpatient clinics and medical centres, physicians (both site  
39  
40 investigators and community physicians), hospital inpatient lists and lists of previous prostate cancer  
41  
42 research participants.  
43  
44  
45

46  
47 In studies of fair quality, the health service referral sources fell into two broad categories; those that  
48  
49 were affiliated with a study site (i.e. referrals through an existing clinical pathway or a study  
50  
51 investigator's clinic) and those that were not. For studies that could draw referrals from affiliated  
52  
53 health services,[34,38] health service referral was the most effective participant referral strategy  
54  
55 contributing 41%[38] and 82%[34] of participants. For the remaining two studies, which sought  
56  
57  
58  
59  
60

1  
2  
3 referrals from health services not linked to the study, health services referrals were comparatively  
4  
5 ineffective, contributing only 8%<sup>[41]</sup> and 10%<sup>[40]</sup> of participants.  
6  
7

8 Recruitment uptake from health services referral was generally higher than other strategies but was  
9  
10 highly variable, ranging from 0% to 54% of referrals being randomised to the host RCT.<sup>[34,38,41]</sup>  
11  
12 Only one study<sup>[34]</sup> reported cost-effectiveness. Referrals from a variety of health services cost \$101  
13  
14 per participant randomised on average (see Table 8 for details). Referral from an affiliated health  
15  
16 service was the cheapest referral source (\$44 per participant randomised).<sup>[34]</sup>  
17  
18

### 19 20 21 Community outreach

22  
23 Seven studies evaluated community outreach strategies<sup>[35,37-42]</sup> including posters displayed in  
24  
25 community locations and healthcare clinics, and presentations to health service providers and the  
26  
27 public.  
28  
29

30  
31 Two studies reported that community outreach activities were ineffective, accounting for only  
32  
33 2%<sup>[41]</sup> and 4%<sup>[40]</sup> of participants. The remaining five studies were excluded due to poor quality or  
34  
35 failure to report the outcome of community outreach activities.  
36  
37

### 38 39 Patient information and consent

40  
41 Five studies evaluated strategies to improve the patient information and consent process.<sup>[43-47]</sup>  
42  
43 The strategy uptake reported in each of these studies is shown in Table 6. The studies aimed to  
44  
45 improve either the content of the information provided to the participant at the recruitment visit or  
46  
47 the mechanism by which that information was provided. All studies in this category were hosted  
48  
49 within prostate cancer treatment trials, perhaps reflecting the challenges inherent in recruiting  
50  
51 participants to prostate cancer trials where treatment options may be diverse, e.g. surgery, radiation  
52  
53 and watchful waiting.  
54  
55  
56  
57  
58  
59  
60

1  
2  
3 Two papers evaluated a trial-specific recruitment training intervention delivered to site-based  
4 recruitment staff and implemented within the feasibility and main phases of the PROTECT  
5 trial.[43,45] The intervention involved audio-taping recruitment interviews and performing  
6 qualitative to investigate how trial information was delivered to participants at the recruitment visit  
7 and how this may impact consent rates. Results of this analysis then guided the development of the  
8 training intervention. After the implementation of the intervention, the recruitment rate was  
9 observed to increase from 30-40% to 70% during the feasibility stage and to remain between 69%  
10 and 65% during the main study. An evaluation of a secondary, intensive training process for  
11 underperforming sites found that recruitment rates increased from 45% to 86% ( $p=0.020$ ) at one site  
12 and from 50% to 78% ( $p=0.013$ ) at another site but numbers at these two sites were small.[45]

13  
14 Other participant information and consent interventions were evaluated in one study each.  
15 Recruitment by nurses was found to be more cost-effective than recruitment by urologists (£36.40  
16 vs £43.29 per screening) and resulted in similar rates of consent (67% vs 71%  $p=0.60$ ).[44] Multi-  
17 disciplinary, group information sessions increased the consent rate from 0% to 16% when compared  
18 to a one-on-one recruitment consultation.[47] A 30-minute decision aid video presented at the  
19 recruitment visit may have reduced the consent rate in one study although the study was  
20 underpowered.[46]

### 21 **Strategies addressing multiple stages of the recruitment process**

22  
23 Two studies evaluated strategies that addressed the recruitment process as a whole (identification  
24 of participants, assessment of eligibility, provision of participant information and seeking of consent)  
25 rather than one specific stage of recruitment. One study evaluated the impact of peer-conducted  
26 site monitoring visits on recruitment.[49] The study reported that of the eight sites visited  
27 monitoring identified specific recruitment process issues at two sites. After monitoring, one site  
28 altered their process for participant reminders and subsequently consent form return rates  
29 increased by 5%. At another site, monitoring uncovered that eligibility criteria were being incorrectly  
30

1  
2  
3 applied and subsequently incorrect exclusion of prospective participants decreased by 5%. While  
4 these improvements to site processes are likely to have improved recruitment, the study did not  
5 report the impact on overall recruitment.  
6  
7  
8

9  
10 Another study evaluated four different approaches to recruit African American men to a cancer  
11 screening trial.[48] The study found that the most intensive intervention (mailing invitation  
12 endorsed by African American community leader, phone screening by African American interviewer  
13 and gathering baseline information at a church-based group session with transport provided)  
14 increased recruitment uptake from 2.9% to 3.9% compared to control (standard mailed invitation,  
15 phone screening by African American or non-African American interviewer and collection of baseline  
16 forms by mail). While this difference was statistically significant ( $p < 0.01$ ), it was small in absolute  
17 magnitude, and the cost of the most intensive intervention is likely to have been high although cost  
18 data were not reported. Other approaches that included less intensive combinations of mailing  
19 invitation endorsed by an African American community leader, phone screening by African American  
20 interviewer and gathering baseline information by phone did not result in a statistically significant  
21 increase in recruitment uptake compared to control.  
22  
23  
24  
25  
26  
27  
28  
29  
30  
31  
32  
33  
34  
35  
36  
37

## 38 **DISCUSSION**

### 39 **Principal findings**

40  
41 In this review, we aimed to evaluate recruitment strategies in RCTs of men aged 50 years and older.  
42  
43 We found that the best approaches for identifying participants were referral through an affiliated  
44 health service provider, media coverage and mass mailings. Community outreach activities and  
45 referrals from unaffiliated health service providers were not effective strategies for improving  
46 recruitment. Recruitment was improved by trial-specific training informed by qualitative analysis of  
47 the recruitment visit and delivered to site-based recruitment staff.  
48  
49  
50  
51  
52  
53  
54  
55  
56  
57

### 58 **Context within the existing literature**



1  
2  
3 This review included only recruitment evaluations in RCTs of men aged 50 years and over and was  
4 dominated by RCTs in prostate cancer. However, our findings were broadly consistent with  
5 recruitment studies in both men and women, ranging in age from young adults[14] to the  
6 elderly,[12] and across primary care,[52] disease prevention[25], health screening[53,54], and  
7 cancer and surgical[55] research. Nonetheless, some previous studies have reported differences in  
8 strategy effectiveness based on age and gender. Mass mailing strategies were more effective in men  
9 than women, and effectiveness increased with age.[25] By contrast, online advertising strategies  
10 were more effective in women than men,[29,56] and most recruited participants were adolescents  
11 and young adults.[28] Community outreach activities appeared to have limited effectiveness in the  
12 general population,[26,30,57] with some suggestion that they were more effective in women than in  
13 men.[51] Elsewhere, two reviews reported that community outreach activities might be effective  
14 when recruiting hard-to-reach participants such as vulnerable[58]and elderly[12] populations. These  
15 reviews reported community outreach activities tailored to the specific target populations. Some  
16 tailoring was evident in the studies included in the current review (for example, holding screening  
17 sessions at men's health events[39,40] and producing brochures in colours expected to appeal to  
18 men [38]) but the context and content of community outreach activities were not described in  
19 detail. It is unknown whether further tailoring could have improved the effectiveness of community  
20 outreach activities in the recruitment of men aged 50 years and over. An upcoming Cochrane review  
21 may elucidate how age and gender modify the effect of specific recruitment strategies.[59]

### 22 23 24 25 26 27 28 29 30 31 32 33 34 35 36 37 38 39 40 41 42 43 44 45 46 47 **Strengths and limitations**

48  
49 This review is strengthened by the adaption of the SEAR framework to categorise the included  
50 studies. Research into recruitment strategies is fragmented[5], and researchers seeking evidence-  
51 based solutions to their recruitment challenges may find the current evidence difficult to digest.  
52  
53  
54  
55  
56  
57  
58  
59  
60  
61  
62  
63  
64  
65  
66  
67  
68  
69  
70  
71  
72  
73  
74  
75  
76  
77  
78  
79  
80  
81  
82  
83  
84  
85  
86  
87  
88  
89  
90  
91  
92  
93  
94  
95  
96  
97  
98  
99  
100  
Categorising studies according to the stage of the recruitment process rather than categorising by  
intervention characteristics has a number of advantages. Firstly, it is intuitive to use and understand

1  
2  
3 since it mirrors real-world trial processes. Secondly, for researchers using the SEAR framework to  
4 collect recruitment data and identify recruitment challenges, our review provides a roadmap for  
5 navigating the available evidence and selecting the most promising interventions to address these  
6 challenges.  
7  
8  
9

10  
11  
12  
13 By grouping studies according to the SEAR framework, our review uncovered inconsistencies in how  
14 strategies to identify prospective participants were evaluated. All studies in this category reported  
15 strategy contributions to overall recruitment but only four studies reported strategy uptake and two  
16 reported strategy costs. There was a lack of consensus across studies on which of these outcomes  
17 was most appropriate and it was unclear how studies decided whether strategies were effective or  
18 not. Intuitively, these three possible outcomes (contribution, uptake and cost) are, individually,  
19 insufficient to evaluate overall strategy effectiveness. For example, if a strategy contributed 80% of  
20 study participants does this indicate that the strategy was effective or simply that few other  
21 strategies were used? Likewise, if a strategy was low cost but resulted in few participants being  
22 randomised was it more or less effective than an expensive strategy that delivered large numbers of  
23 participants? Greater transparency in how strategies to identify participants are selected and  
24 assessed, and the costs involved would assist with the interpretation of study results in this area.  
25  
26  
27  
28  
29  
30  
31  
32  
33  
34  
35  
36  
37  
38  
39

40  
41 Of the estimated large number of men's health RCTs conducted worldwide since 2000, only 16  
42 studies of recruitment strategy evaluation were found, and 12 of these studies were related to  
43 prostate cancer (4 from a single prostate cancer trial). Consequently, this review likely describes only  
44 a small fraction of the recruitment practices used to recruit men aged 50 years and older to RCTs  
45 and may be subject to publication bias. We included only single-gender, men's RCTs in order to  
46 focus on gender-specific recruitment strategies. Several included studies described recruitment  
47 strategies that appeared to be male-focused (identifying participants through veteran's groups and  
48 health services,[35,40] holding screening sessions at men's health events,[39,40] offering screening  
49 outside normal working hours[37] and producing brochures in colours expected to appeal to  
50  
51  
52  
53  
54  
55  
56  
57  
58  
59  
60

1  
2  
3 men[38]). However, no study explicitly presented a gender-sensitized approach to recruitment or  
4 addressed the literature on men's health preferences.[60] Since studies evaluating recruitment to  
5 RCTs of both men and women were excluded, the results presented in this review are likely to be  
6 most relevant to the small but growing number of RCTs in men only.[61] However, our approach to  
7 synthesizing recruitment evidence and evaluating strategy effectiveness by recruitment stage may  
8 be relevant to recruitment to RCTs more broadly.  
9

10  
11 This review considered only quantitative evidence from recruitment evaluation studies, a common  
12 approach in systematic reviews of recruitment strategies.[7,8,13,14] However, qualitative research  
13 methods also have the potential to address recruitment challenges[62] and several included studies  
14 presented both quantitative and qualitative evidence. Future systematic reviews of recruitment  
15 strategies may be strengthened by synthesizing all available evidence using a mixed methods  
16 approach.[63]  
17

18  
19 We recommend caution when implementing recruitment strategies based on our findings since  
20 generalisability is hampered by weak recruitment study design, and insufficient reporting of the  
21 intervention content, context, delivery and cost in many of the included studies. Based on recently  
22 proposed criteria,[64] additional evaluations of all potentially effective strategies identified in this  
23 review are likely to be of merit.  
24  
25

### 26 **Implications for research**

27  
28 Our review uncovered areas of uncertainty across all stages of the recruitment process. In particular,  
29 further research is needed to assess whether gender-sensitized strategies can enhance recruitment  
30 of men aged 50 years and over to RCTs, and to assess the effectiveness of online advertising and  
31 promotions to recruit this demographic group. Future research may benefit from being conducted as  
32 a prospectively designed Study Within a Trial (SWAT), following the recent guidance provided by  
33 Trial Forge[65]. Researchers are encouraged to reveal how strategy effectiveness was assessed and  
34  
35  
36  
37  
38  
39  
40  
41  
42  
43  
44  
45  
46  
47  
48  
49  
50  
51  
52  
53  
54  
55  
56  
57  
58  
59  
60

1  
2  
3 to report cost outcomes. Since there are many uncertainties in recruitment methods, research  
4  
5 should address one or more of the priority recruitment questions recently identified by the  
6  
7  
8  
9  
10  
11  
12  
13  
14  
15  
16  
17  
18  
19  
20  
21  
22  
23  
24  
25  
26  
27  
28  
29  
30  
31  
32  
33  
34  
35  
36  
37  
38  
39  
40  
41  
42  
43  
44  
45  
46  
47  
48  
49  
50  
51  
52  
53  
54  
55  
56  
57  
58  
59  
60

to report cost outcomes. Since there are many uncertainties in recruitment methods, research should address one or more of the priority recruitment questions recently identified by the Prioritising Recruitment in Randomised Trials (PRioRiT<sub>y</sub>) study.[66] This will not only improve the impact of individual studies but also deepen the body of recruitment evidence in general.[8]

## ABBREVIATIONS

CINAHL: Cumulative Index to Nursing and Allied Health Literature

ORRCA: Online Resource for Recruitment Research in Clinical Trials

PPI: Patient and public involvement

PRioRiT<sub>y</sub> study: Prioritising Recruitment in Randomised Trials study

PRISMA: Preferred Reporting Items for Systematic Reviews and Meta-Analyses

QuinteT: Qualitative Research Integrated within Trials

RCT: randomised controlled trial

SEAR framework: Screened, Eligible, Approached, Randomised framework

## DECLARATIONS

### Funding

KB is supported by a postgraduate scholarship from the NHMRC Clinical Trials Centre, University of Sydney.

### Competing interests

None to declare

### Author contributions

The review was conceived by KB and GW. KB performed the database searches. KB and GW performed eligibility checking. KB extracted the data from included studies and KB and LA performed the quality assessments. KB wrote the first draft of the manuscript. KB, LA, AK, WH and GW reviewed and refined the manuscript and approved the final manuscript.

### Acknowledgements

We thank Rod Dyson and Sherilyn Goldstone for their contributions to this work.

### Data sharing

Extracted, summary, recruitment data are available on request from the corresponding author ([karen.bracken@ctc.usyd.edu.au](mailto:karen.bracken@ctc.usyd.edu.au))

### Ethics approval and consent to participate

Not applicable

## REFERENCES

1. Walters SJ, Bonacho dos Anjos Henriques-Cadby I, Bortolami O, et al. Recruitment and retention of participants in randomised controlled trials: a review of trials funded and published by the United Kingdom Health Technology Assessment Programme. *BMJ Open* 2017;7:e015276. doi: 10.1136/bmjopen-2016-015276
2. Sully BGO, Julius SA, Nicholl J. A reinvestigation of recruitment to randomised, controlled, multicentre trials: a review of trials funded by two UK funding agencies. *Trials* 2013;14:166. doi: 10.1186/1745-6215-14-166
3. McDonald AM, Knight RC, Campbell MK, et al. What influences recruitment to randomised controlled trials? A review of trials funded by two UK funding agencies. *Trials* 2006;7:9. doi: 10.1186/1745-6215-7-9
4. Tudur Smith C, Hickey H, Clarke M, et al. The trials methodological research agenda: results from a priority setting exercise. *Trials* 2014;15:32. doi: 10.1186/1745-6215-15-32
5. Bower P, Brueton V, Gamble C, et al. Interventions to improve recruitment and retention in clinical trials: a survey and workshop to assess current practice and future priorities. *Trials* 2014;15:399. doi: 10.1186/1745-6215-15-399
6. Treweek S, Lockhart P, Pitkethly M, et al. Methods to improve recruitment to randomised controlled trials: Cochrane systematic review and meta-analysis. *BMJ Open* 2013;3:e002360. doi: 10.1136/bmjopen-2012-002360
7. Caldwell PH, Hamilton S, Tan A, et al. Strategies for increasing recruitment to randomised controlled trials: systematic review. *PLoS Med* 2010;7:e1000368.
8. Treweek S, Pitkethly M, Cook J, et al. Strategies to improve recruitment to randomised trials. *Cochrane Database Syst Rev* 2018:MR000013. doi: 10.1002/14651858.MR000013.pub6
9. Trivedi RB, Szarka JG, Beaver K, et al. Recruitment and retention rates in behavioral trials involving patients and a support person: a systematic review. *Contemp Clin Trials* 2013;36:307-18. doi: 10.1016/j.cct.2013.07.009
10. Amon KL, Campbell AJ, Hawke C, et al. Facebook as a recruitment tool for adolescent health research: a systematic review. *Acad Pediatr* 2014;14:439-47.e4. doi: 10.1016/j.acap.2014.05.049
11. Cooper C, Ketley D, Livingston G. Systematic review and meta-analysis to estimate potential recruitment to dementia intervention studies. *Int J Geriatr Psychiatry* 2014;29:515-25. doi: 10.1002/gps.4034
12. Provencher V, Mortenson WB, Tanguay-Garneau L, et al. Challenges and strategies pertaining to recruitment and retention of frail elderly in research studies: a systematic review. *Arch Gerontol Geriatr* 2014;59:18-24. doi: 10.1016/j.archger.2014.03.006
13. Boland J, Currow DC, Wilcock A, et al. A systematic review of strategies used to increase recruitment of people with cancer or organ failure into clinical trials: implications for palliative care research. *J Pain Symptom Manage* 2015;49:762-72.e5. doi: 10.1016/j.jpainsymman.2014.09.018
14. Lam E, Partridge SR, Allman-Farinelli M. Strategies for successful recruitment of young adults to healthy lifestyle programmes for the prevention of weight gain: a systematic review. *Obes Rev* 2016;17:178-200. doi: 10.1111/obr.12350
15. Galli L, Knight R, Robertson S, et al. Using marketing theory to inform strategies for recruitment: a recruitment optimisation model and the txt2stop experience. *Trials* 2014;15:182. doi: 10.1186/1745-6215-15-182 [published Online First: 2014/06/03]
16. Doyal L. Sex, gender, and health: the need for a new approach. *BMJ* 2001;323:1061-63.
17. Payne S. How can gender equity be addressed through health systems? Copenhagen: World Health Organization 2009.
18. U.S. Food and Drug Administration. Guideline for the study and evaluation of gender differences in the clinical evaluation of drugs; notice. *Fed Regist* 1993;58:39406.

19. Coakley M, Fadiran EO, Parrish LJ, et al. Dialogues on diversifying clinical trials: successful strategies for engaging women and minorities in clinical trials. *J Womens Health* 2012;21:713-16.
20. Australian Burden of Disease Study. Impact and causes of illness and death in Australia: Australian Institute of Health and Welfare; 2011 revised 2016 Available from: <https://www.aihw.gov.au/getmedia/d4df9251-c4b6-452f-a877-8370b6124219/19663.pdf.aspx?inline=true> accessed 23 March 2018.
21. The Health of Australian Males: Australian Institute of Health and Welfare; 2017 Available from: <https://www.aihw.gov.au/reports/men-women/male-health/contents/who-are> accessed 23 March 2018.
22. Macdonald JJ. Shifting paradigms: a social-determinants approach to solving problems in men's health policy and practice. *Med J Aust* 2006;185:456.
23. Smith JA, Robertson S. Men's health promotion: a new frontier in Australia and the UK? *Health Promot Int* 2008;23:283-89. doi: 10.1093/heapro/dan019
24. Hunt K, Wyke S, Gray CM, et al. A gender-sensitised weight loss and healthy living programme for overweight and obese men delivered by Scottish Premier League football clubs (FFIT): a pragmatic randomised controlled trial. *Lancet (London, England)* 2014;383:1211-21. doi: 10.1016/S0140-6736(13)62420-4
25. Rubin RR, Fujimoto WY, Marrero DG, et al. The Diabetes Prevention Program: recruitment methods and results. *Control Clin Trials* 2002;23:157-71. doi: 10.1016/s0197-2456(01)00184-2
26. Tate DF, LaRose JG, Griffin LP, et al. Recruitment of young adults into a randomized controlled trial of weight gain prevention: message development, methods, and cost. *Trials* 2014;15:326. doi: 10.1186/1745-6215-15-326
27. Pagoto SL, Schneider KL, Oleski JL, et al. Male inclusion in randomized controlled trials of lifestyle weight loss interventions. *Obesity (Silver Spring)* 2012;20:1234-39.
28. Whitaker C, Stevelink S, Fear N. The Use of Facebook in Recruiting Participants for Health Research Purposes: A Systematic Review. *J Med Internet Res* 2017;19:e290. doi: 10.2196/jmir.7071
29. Huesch MD, Mukherjee D, Saunders EFH. E-recruitment into a bipolar disorder trial using Facebook tailored advertising. *Clin Trials* 2018;1740774518784018. doi: 10.1177/1740774518784018
30. Christensen T, Riis AH, Hatch EE, et al. Costs and Efficiency of Online and Offline Recruitment Methods: A Web-Based Cohort Study. *J Med Internet Res* 2017;19:e58. doi: 10.2196/jmir.6716 [published Online First: 01.03.2017]
31. Carter-Harris L, Bartlett Ellis R, Warrick A, et al. Beyond Traditional Newspaper Advertisement: Leveraging Facebook-Targeted Advertisement to Recruit Long-Term Smokers for Research. *J Med Internet Res* 2016;18:e117. doi: 10.2196/jmir.5502 [published Online First: 2016/06/17]
32. Wilson C, Rooshenas L, Paramasivan S, et al. Development of a framework to improve the process of recruitment to randomised controlled trials (RCTs): the SEAR (Screened, Eligible, Approached, Randomised) framework. *Trials* 2018;19:50. doi: 10.1186/s13063-017-2413-6
33. Study Quality Assessment Tools: National Heart, Lung, and Blood Institute; Available from: <https://www.nhlbi.nih.gov/health-topics/study-quality-assessment-tools> accessed 28 November 2017.
34. Bhar SS, Wiltsey-Stirman S, Zembroski D, et al. Recruiting older men for geriatric suicide research. *Int Psychogeriatr* 2013;25:88-95.
35. Cauley JA, Fluharty L, Ellenberg SS, et al. Recruitment and Screening for the Testosterone Trials. *J Gerontol A Biol Sci Med Sci* 2015;70:1105-11. doi: 10.1093/gerona/glv031
36. Chlebowski RT, Menon R, Chaisanguanthum RM, et al. Prospective evaluation of two recruitment strategies for a randomized controlled cancer prevention trial. *Clin Trials* 2010;7:744-8. doi: 10.1177/1740774510383886



- 1
  - 2
  - 3
  - 4
  - 5
  - 6
  - 7
  - 8
  - 9
  - 10
  - 11
  - 12
  - 13
  - 14
  - 15
  - 16
  - 17
  - 18
  - 19
  - 20
  - 21
  - 22
  - 23
  - 24
  - 25
  - 26
  - 27
  - 28
  - 29
  - 30
  - 31
  - 32
  - 33
  - 34
  - 35
  - 36
  - 37
  - 38
  - 39
  - 40
  - 41
  - 42
  - 43
  - 44
  - 45
  - 46
  - 47
  - 48
  - 49
  - 50
  - 51
  - 52
  - 53
  - 54
  - 55
  - 56
  - 57
  - 58
  - 59
  - 60
37. Cook ED, Arnold KB, Hermos JA, et al. Impact of supplemental site grants to increase African American accrual for the Selenium and Vitamin E Cancer Prevention Trial. *Clin Trials* 2010;7:90-99.
38. Heiney SP, Arp Adams S, Drake BF, et al. Successful subject recruitment for a prostate cancer behavioral intervention trial. *Clin Trials* 2010;7:411-7. doi: 10.1177/1740774510373491
39. Kumar N, Crocker T, Smith T, et al. Challenges and potential solutions to meeting accrual goals in a Phase II chemoprevention trial for prostate cancer. *Contemp Clin Trials* 2012;33:279-85. doi: 10.1016/j.cct.2011.11.004
40. Kusek JW, Ahrens A, Burrows PK, et al. Recruitment for a clinical trial of drug treatment for benign prostatic hyperplasia. *Urology* 2002;59:63-7.
41. Lee JY, Foster HE, Jr., McVary KT, et al. Recruitment of participants to a clinical trial of botanical therapy for benign prostatic hyperplasia. *J Altern Complement Med* 2011;17:469-72.
42. Moinpour CM, Atkinson JO, Thomas SM, et al. Minority recruitment in the prostate cancer prevention trial. *Ann Epidemiol* 2000;10:S85-91.
43. Donovan J, Mills N, Smith M, et al. Improving design and conduct of randomised trials by embedding them in qualitative research: ProtecT (prostate testing for cancer and treatment) study. *Br Med J* 2002;325:766-70.
44. Donovan JL, Peters TJ, Noble S, et al. Who can best recruit to randomized trials? Randomized trial comparing surgeons and nurses recruiting patients to a trial of treatments for localized prostate cancer (the ProtecT study). *J Clin Epidemiol* 2003;56:605-9.
45. Donovan JL, Lane JA, Peters TJ, et al. Development of a complex intervention improved randomization and informed consent in a randomized controlled trial. *J Clin Epidemiol* 2009;62:29-36. doi: 10.1016/j.jclinepi.2008.02.010
46. Eccles BK, Cross W, Rosario DJ, et al. SABRE 1 (Surgery Against Brachytherapy—a Randomised Evaluation): feasibility randomised controlled trial (RCT) of brachytherapy vs radical prostatectomy in low–intermediate risk clinically localised prostate cancer. *BJU Int* 2013;112:330-37.
47. Wallace K, Fleshner N, Jewett M, et al. Impact of a multi-disciplinary patient education session on accrual to a difficult clinical trial: the Toronto experience with the surgical prostatectomy versus interstitial radiation intervention trial. *J Clin Oncol* 2006;24:4158-62. doi: 10.1200/JCO.2006.06.3875
48. Ford ME, Havstad SL, Davis SD. A randomized trial of recruitment methods for older African American men in the Prostate, Lung, Colorectal and Ovarian (PLCO) Cancer Screening Trial. *Clin Trials* 2004;1:343-51. doi: 10.1191/1740774504cn029oa
49. Lane JA, Wade J, Down L, et al. A Peer Review Intervention for Monitoring and Evaluating sites (PRIME) that improved randomized controlled trial conduct and performance. *J Clin Epidemiol* 2011;64:628-36. doi: 10.1016/j.jclinepi.2010.10.003
50. Huynh L, Johns B, Liu SH, et al. Cost-effectiveness of health research study participant recruitment strategies: a systematic review. *Clin Trials* 2014;11:576-83. doi: 10.1177/1740774514540371
51. Silagy CA, Campion K, McNeil JJ, et al. Comparison of recruitment strategies for a large-scale clinical trial in the elderly. *J Clin Epidemiol* 1991;44:1105-14. doi: 10.1016/0895-4356(91)90013-Y
52. Ngune I, Jiwa M, Dadich A, et al. Effective recruitment strategies in primary care research: a systematic review. *Qual Prim Care* 2012;20:115-23.
53. Menon U, Gentry-Maharaj A, Ryan A, et al. Recruitment to multicentre trials—lessons from UKCTOCS: descriptive study. *BMJ* 2008;337 doi: 10.1136/bmj.a2079
54. Hinshaw LB, Jackson SA, Chen MY. Direct mailing was a successful recruitment strategy for a lung-cancer screening trial. *J Clin Epidemiol* 2007;60:853-7. doi: 10.1016/j.jclinepi.2006.11.005 [published Online First: 2007/07/04]



- 1  
2  
3  
4  
5  
6  
7  
8  
9  
10  
11  
12  
13  
14  
15  
16  
17  
18  
19  
20  
21  
22  
23  
24  
25  
26  
27  
28  
29  
30  
31  
32  
33  
34  
35  
36  
37  
38  
39  
40  
41  
42  
43  
44  
45  
46  
47  
48  
49  
50  
51  
52  
53  
54  
55  
56  
57  
58  
59  
60
55. Rooshenas L, Scott LJ, Blazeby JM, et al. The QuinteT Recruitment Intervention supported five randomized trials to recruit to target: a mixed-methods evaluation. *J Clin Epidemiol* 2019;106:108-20. doi: 10.1016/j.jclinepi.2018.10.004
  56. Juraschek SP, Plante TB, Charleston J, et al. Use of online recruitment strategies in a randomized trial of cancer survivors. *Clin Trials* 2017;1740774517745829. doi: 10.1177/1740774517745829 [published Online First: 2018/01/25]
  57. Copeland RJ, Horspool K, Humphreys L, et al. Recruiting to a large-scale physical activity randomised controlled trial – experiences with the gift of hindsight. *Trials* 2016;17:1-12. doi: 10.1186/s13063-016-1229-0
  58. UyBico SJ, Pavel S, Gross CP. Recruiting vulnerable populations into research: a systematic review of recruitment interventions. *J Gen Intern Med* 2007;22:852-63. doi: 10.1007/s11606-007-0126-3
  59. Gardner HR, Fraser C, MacLennan G, et al. A protocol for a systematic review of non-randomised evaluations of strategies to improve participant recruitment to randomised controlled trials. *Syst Rev* 2016;5:131. doi: 10.1186/s13643-016-0308-3 [published Online First: 2016/08/04]
  60. Smith JA, Braunack-Mayer AJ, Wittert GA, et al. Qualities men value when communicating with general practitioners: implications for primary care settings. *The Medical Journal of Australia* 2008;189:618-21.
  61. The Clinical Trials Landscape in Australia 2006-2015: Australian New Zealand Clinical Trials Registry; Available from: <http://www.anzctr.org.au/docs/ClinicalTrialsInAustralia2006-2015.pdf> accessed 10 Jan 2018.
  62. Elliott D, Husbands S, Hamdy FC, et al. Understanding and Improving Recruitment to Randomised Controlled Trials: Qualitative Research Approaches. *Eur Urol* 2017;72:789-98. doi: 10.1016/j.eururo.2017.04.036
  63. Pearson A, White H, Bath-Hextall F, et al. A mixed-methods approach to systematic reviews. *International journal of evidence-based healthcare* 2015;13:121-31.
  64. Treweek S, Bevan S, Bower P, et al. Trial Forge Guidance 2: How to decide if a further Study Within A Trial (SWAT) is needed [pre-print] Available from: <https://www.researchsquare.com/article/94854a88-d672-450d-b31a-b983828ccf49/v1> accessed 11 Dec 2018.
  65. Treweek S, Bevan S, Bower P, et al. Trial Forge Guidance 1: what is a Study Within A Trial (SWAT)? *Trials* 2018;19:139. doi: 10.1186/s13063-018-2535-5
  66. Healy P, Galvin S, Williamson PR, et al. Identifying trial recruitment uncertainties using a James Lind Alliance Priority Setting Partnership – the PRioRiTy (Prioritising Recruitment in Randomised Trials) study. *Trials* 2018;19:147. doi: 10.1186/s13063-018-2544-4

1  
2  
3 **Figure 1: Search and screening results**  
4  
5  
6  
7  
8  
9  
10  
11  
12  
13  
14  
15  
16  
17  
18  
19  
20  
21  
22  
23  
24  
25  
26  
27  
28  
29  
30  
31  
32  
33  
34  
35  
36  
37  
38  
39  
40  
41  
42  
43  
44  
45  
46  
47  
48  
49  
50  
51  
52  
53  
54  
55  
56  
57  
58  
59  
60

For peer review only

1  
2  
3  
4  
5  
6  
7  
8  
9  
10  
11  
12  
13  
14  
15  
16  
17  
18  
19  
20  
21  
22  
23  
24  
25  
26  
27  
28  
29  
30  
31  
32  
33  
34  
35  
36  
37  
38  
39  
40  
41  
42  
43  
44  
45  
46  
47  
48  
49  
50  
51  
52  
53  
54  
55  
56  
57  
58  
59  
60

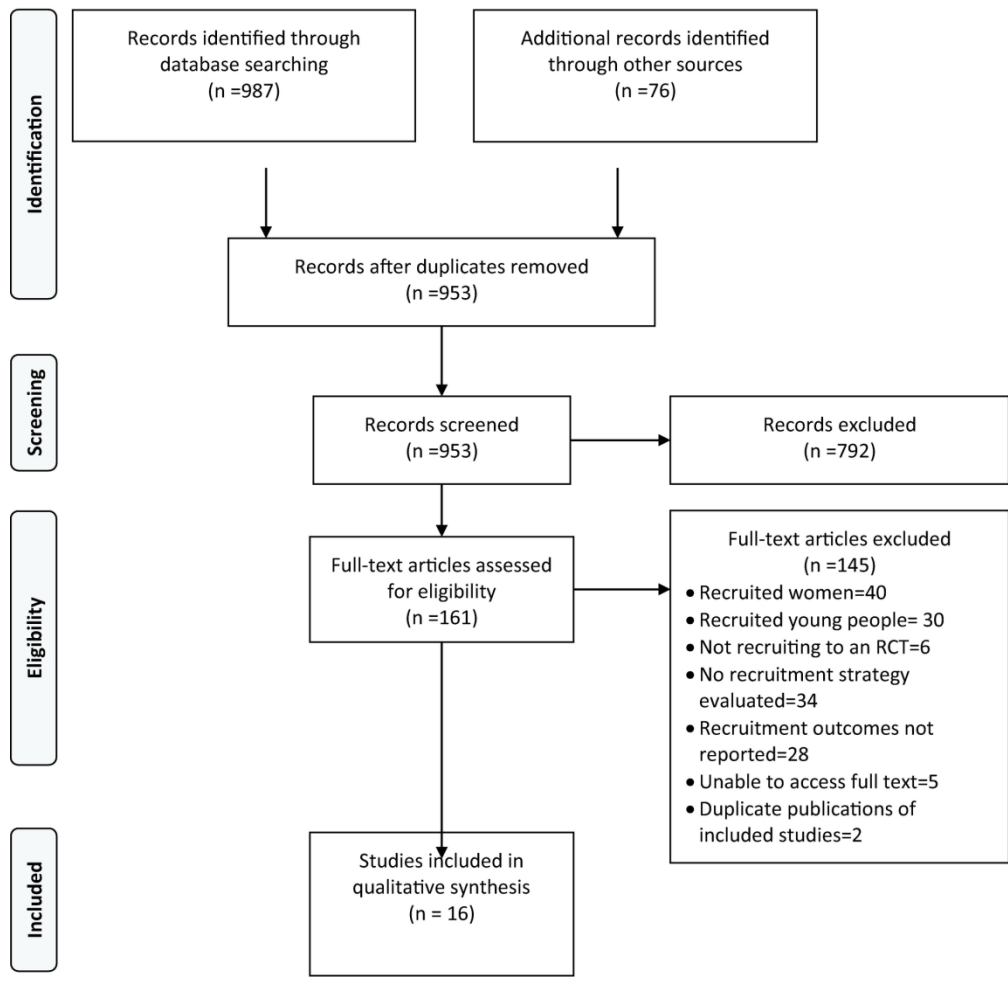

Figure 1: Search and screening results

180x187mm (300 x 300 DPI)

### Database search strategies

Searches undertaken 28-30 August 2017 and updated 1 December 2017

Database(s): Ovid MEDLINE(R) 1946 to November Week 4 2017

Search Strategy:

- 1 Patient Selection/ (62722)
- 2 (recruit\* or enrol\*).ti. (29374)
- 3 1 or 2 (89212)
- 4 (male or men or men's or mens or man).tw. (1328352)
- 5 3 and 4 (4910)
- 6 randomized controlled trial.pt. (505126)
- 7 controlled clinical trial.pt. (100403)
- 8 randomized.ab. (391531)
- 9 placebo.ab. (189148)
- 10 clinical trials as topic.sh. (197003)
- 11 randomly.ab. (266025)
- 12 trial.ti. (175432)
- 13 or/6-12 (1131407)
- 14 exp animals/ not humans.sh. (4742733)
- 15 13 not 14 (1035827)
- 16 5 and 15 (881)
- 17 limit 16 to (english language and yr="2000 - 2017") (717)

Database(s): Embase Classic 1947 to 1973, Embase 1974 to 2017 November 29

Search Strategy:

- 1 patient selection/ (82554)
- 2 (recruit\* or enrol\*).ti. (37067)
- 3 1 or 2 (118188)
- 4 male/ (7776297)
- 5 (male or men or men's or mens or man).tw. (2046754)
- 6 4 or 5 (8236464)
- 7 Randomized Controlled Trial/ (485342)
- 8 rct.tw. (26750)
- 9 7 or 8 (502579)
- 10 3 and 6 and 9 (2490)
- 11 limit 10 to (human and english language and exclude medline journals and yr="2000 -Current") (112)

Database: CINAHL

Search strategy:

- S1 ((MH "Research Subject Recruitment")) OR (TI recruit\*) OR (TI enrol\*)
- S2 ((MH "Male") OR (MH "Men")) OR (TI (men OR male\* OR man OR mens OR men's))
- S3 (MH "Clinical Trials+")
- S4 S1 and S2 and S3
- S5 S4 Limiters - English Language; Published Date: 20000101-20171231; Exclude MEDLINE records (108)

1  
2  
3 Database: ORRCA

4 Search strategy:

5  
6 Inclusion:

- 7 • Gender = Male only

8  
9 Exclusion:

- 10 • Aged <18 years
- 11 • Published before 2000
- 12 • Study outcome "Reason for participant refusal" only

13  
14  
15  
16  
17  
18  
19  
20  
21  
22  
23  
24  
25  
26  
27  
28  
29  
30  
31  
32  
33  
34  
35  
36  
37  
38  
39  
40  
41  
42  
43  
44  
45  
46  
47  
48  
49  
50  
51  
52  
53  
54  
55  
56  
57  
58  
59  
60

For peer review only



# PRISMA 2009 Checklist

| Section/topic                      | #  | Checklist item                                                                                                                                                                                                                                                                                              | Reported on page #   |
|------------------------------------|----|-------------------------------------------------------------------------------------------------------------------------------------------------------------------------------------------------------------------------------------------------------------------------------------------------------------|----------------------|
| <b>TITLE</b>                       |    |                                                                                                                                                                                                                                                                                                             |                      |
| Title                              | 1  | Identify the report as a systematic review, meta-analysis, or both.                                                                                                                                                                                                                                         | 1                    |
| <b>ABSTRACT</b>                    |    |                                                                                                                                                                                                                                                                                                             |                      |
| Structured summary                 | 2  | Provide a structured summary including, as applicable: background; objectives; data sources; study eligibility criteria, participants, and interventions; study appraisal and synthesis methods; results; limitations; conclusions and implications of key findings; systematic review registration number. | 2-3                  |
| <b>INTRODUCTION</b>                |    |                                                                                                                                                                                                                                                                                                             |                      |
| Rationale                          | 3  | Describe the rationale for the review in the context of what is already known.                                                                                                                                                                                                                              | 4-5                  |
| Objectives                         | 4  | Provide an explicit statement of questions being addressed with reference to participants, interventions, comparisons, outcomes, and study design (PICOS).                                                                                                                                                  | 5-6                  |
| <b>METHODS</b>                     |    |                                                                                                                                                                                                                                                                                                             |                      |
| Protocol and registration          | 5  | Indicate if a review protocol exists, if and where it can be accessed (e.g., Web address), and, if available, provide registration information including registration number.                                                                                                                               | 9                    |
| Eligibility criteria               | 6  | Specify study characteristics (e.g., PICOS, length of follow-up) and report characteristics (e.g., years considered, language, publication status) used as criteria for eligibility, giving rationale.                                                                                                      | 5-6                  |
| Information sources                | 7  | Describe all information sources (e.g., databases with dates of coverage, contact with study authors to identify additional studies) in the search and date last searched.                                                                                                                                  | 6                    |
| Search                             | 8  | Present full electronic search strategy for at least one database, including any limits used, such that it could be repeated.                                                                                                                                                                               | Supplementary file 1 |
| Study selection                    | 9  | State the process for selecting studies (i.e., screening, eligibility, included in systematic review, and, if applicable, included in the meta-analysis).                                                                                                                                                   | 6-7                  |
| Data collection process            | 10 | Describe method of data extraction from reports (e.g., piloted forms, independently, in duplicate) and any processes for obtaining and confirming data from investigators.                                                                                                                                  | 7                    |
| Data items                         | 11 | List and define all variables for which data were sought (e.g., PICOS, funding sources) and any assumptions and simplifications made.                                                                                                                                                                       | 7                    |
| Risk of bias in individual studies | 12 | Describe methods used for assessing risk of bias of individual studies (including specification of whether this was done at the study or outcome level), and how this information is to be used in any data synthesis.                                                                                      | 7-8                  |
| Summary measures                   | 13 | State the principal summary measures (e.g., risk ratio, difference in means).                                                                                                                                                                                                                               | 7                    |
| Synthesis of results               | 14 | Describe the methods of handling data and combining results of studies, if done, including measures of consistency (e.g., $I^2$ ) for each meta-analysis.                                                                                                                                                   | 8                    |

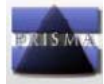

# PRISMA 2009 Checklist

| Section/topic                 | #  | Checklist item                                                                                                                                                                                           | Reported on page #      |
|-------------------------------|----|----------------------------------------------------------------------------------------------------------------------------------------------------------------------------------------------------------|-------------------------|
| Risk of bias across studies   | 15 | Specify any assessment of risk of bias that may affect the cumulative evidence (e.g., publication bias, selective reporting within studies).                                                             | N/A                     |
| Additional analyses           | 16 | Describe methods of additional analyses (e.g., sensitivity or subgroup analyses, meta-regression), if done, indicating which were pre-specified.                                                         | N/A                     |
| <b>RESULTS</b>                |    |                                                                                                                                                                                                          |                         |
| Study selection               | 17 | Give numbers of studies screened, assessed for eligibility, and included in the review, with reasons for exclusions at each stage, ideally with a flow diagram.                                          | 9 + Figure 1            |
| Study characteristics         | 18 | For each study, present characteristics for which data were extracted (e.g., study size, PICOS, follow-up period) and provide the citations.                                                             | Table 1                 |
| Risk of bias within studies   | 19 | Present data on risk of bias of each study and, if available, any outcome level assessment (see item 12).                                                                                                | Tables 1, 3-5           |
| Results of individual studies | 20 | For all outcomes considered (benefits or harms), present, for each study: (a) simple summary data for each intervention group (b) effect estimates and confidence intervals, ideally with a forest plot. | A) Tables 6-9<br>B) N/A |
| Synthesis of results          | 21 | Present results of each meta-analysis done, including confidence intervals and measures of consistency.                                                                                                  | N/A                     |
| Risk of bias across studies   | 22 | Present results of any assessment of risk of bias across studies (see Item 15).                                                                                                                          | N/A                     |
| Additional analysis           | 23 | Give results of additional analyses, if done (e.g., sensitivity or subgroup analyses, meta-regression [see Item 16]).                                                                                    | N/A                     |
| <b>DISCUSSION</b>             |    |                                                                                                                                                                                                          |                         |
| Summary of evidence           | 24 | Summarize the main findings including the strength of evidence for each main outcome; consider their relevance to key groups (e.g., healthcare providers, users, and policy makers).                     | 34-37                   |
| Limitations                   | 25 | Discuss limitations at study and outcome level (e.g., risk of bias), and at review-level (e.g., incomplete retrieval of identified research, reporting bias).                                            | 36-37                   |
| Conclusions                   | 26 | Provide a general interpretation of the results in the context of other evidence, and implications for future research.                                                                                  | 35 & 37-38              |
| <b>FUNDING</b>                |    |                                                                                                                                                                                                          |                         |
| Funding                       | 27 | Describe sources of funding for the systematic review and other support (e.g., supply of data); role of funders for the systematic review.                                                               | 38                      |

From: Moher D, Liberati A, Tetzlaff J, Altman DG, The PRISMA Group (2009). Preferred Reporting Items for Systematic Reviews and Meta-Analyses: The PRISMA Statement. PLoS Med 6(7): e1000097. doi:10.1371/journal.pmed1000097

For more information, visit: [www.prisma-statement.org](http://www.prisma-statement.org).
