# Supplementary material for: Recruitment strategies in randomised controlled trials of men aged 50 years and older: a systematic review
Source: PubMed Central journal article supplement — BMJ Open. 2019 Apr 3;9(4):e025580. doi: 10.1136/bmjopen-2018-025580 (PMC6500287; doi:10.1136/bmjopen-2018-025580), 2019-04-03
Supplement: bmjopen-2018-025580supp001.pdf [file bmjopen-2018-025580supp001.pdf]

## Database search strategies

Searches undertaken 28-30 August 2017 and updated 1 December 2017

Database(s): Ovid MEDLINE(R) 1946 to November Week 4 2017

Search Strategy:

- 1 Patient Selection/ (62722)
- 2 (recruit\* or enrol\*).ti. (29374)
- 3 1 or 2 (89212)
- 4 (male or men or men's or mens or man).tw. (1328352)
- 5 3 and 4 (4910)
- 6 randomized controlled trial.pt. (505126)
- 7 controlled clinical trial.pt. (100403)
- 8 randomized.ab. (391531)
- 9 placebo.ab. (189148)
- 10 clinical trials as topic.sh. (197003)
- 11 randomly.ab. (266025)
- 12 trial.ti. (175432)
- 13 or/6-12 (1131407)
- 14 exp animals/ not humans.sh. (4742733)
- 15 13 not 14 (1035827)
- 16 5 and 15 (881)
- 17 limit 16 to (english language and yr="2000 - 2017") (717)

Database(s): Embase Classic 1947 to 1973, Embase 1974 to 2017 November 29

Search Strategy:

- 1 patient selection/ (82554)
- 2 (recruit\* or enrol\*).ti. (37067)
- 3 1 or 2 (118188)
- 4 male/ (7776297)
- 5 (male or men or men's or mens or man).tw. (2046754)
- 6 4 or 5 (8236464)
- 7 Randomized Controlled Trial/ (485342)
- 8 rct.tw. (26750)
- 9 7 or 8 (502579)
- 10 3 and 6 and 9 (2490)
- 11 limit 10 to (human and english language and exclude medline journals and yr="2000 -Current") (112)

Database: CINAHL

Search strategy:

- S1 ((MH "Research Subject Recruitment")) OR (TI recruit\*) OR (TI enrol\*)
- S2 ((MH "Male") OR (MH "Men")) OR (TI (men OR male\* OR man OR mens OR men's))
- S3 (MH "Clinical Trials+")
- S4 S1 and S2 and S3
- S5 S4 Limiters - English Language; Published Date: 20000101-20171231; Exclude MEDLINE records (108)

Database: ORRCA

Search strategy:

Inclusion:

- Gender = Male only

Exclusion:

- Aged <18 years
- Published before 2000
- Study outcome "Reason for participant refusal" only
